# Supplementary material for: Anti-inflammatory alkaloid glycoside and quinoline alkaloid derivates from the stems of Clausena lansium
Source: Royal Society of Chemistry journal article supplement (doi:10.1039/c5ra14173g), 2015-01-01
Supplement: c5ra14173g1.pdf [file c5ra14173g1.pdf]

**Anti-inflammatory alkaloid Glycoside and Quinoline alkaloid  
derivates from the stems of *Clausena lansium***

Jie Liu,<sup>a</sup> Chuang-Jun Li,<sup>a</sup> Lin Ni,<sup>a</sup> Jing-Zhi Yang,<sup>a</sup> Li Li,<sup>a</sup> Cai-xia Zang,<sup>a</sup> Xiu-Qi Bao,<sup>a</sup> Dan Zhang,<sup>a</sup> Dong-Ming Zhang<sup>\*a</sup>

<sup>a</sup> State Key Laboratory of Bioactive Substance and Function of Natural Medicines, Institute of Materia Medica, Chinese Academy of Medical Sciences and Peking Union Medical College, Beijing 100050, People's Republic of China  
E-mail: zhangdm@imm.ac.cn; Tel/fax: +86-10-63165227.

**Supporting Information**

## List of Supporting Information

|                                                                                                                      |    |
|----------------------------------------------------------------------------------------------------------------------|----|
| Figure S1. The $^1\text{H}$ NMR (400 MHz) spectrum of Clausenaside A (1) in $\text{DMSO-}d_6$ .....                  | 4  |
| Figure S2. The $^{13}\text{C}$ NMR (100 MHz) spectrum of Clausenaside A (1) in $\text{DMSO-}d_6$ .....               | 5  |
| Figure S3. The DEPT spectrum of Clausenaside A (1) in $\text{DMSO-}d_6$ .....                                        | 6  |
| Figure S4. The HSQC spectrum of Clausenaside A (1) in $\text{DMSO-}d_6$ .....                                        | 7  |
| Figure S5. The HMBC spectrum of Clausenaside A (1) in $\text{DMSO-}d_6$ .....                                        | 8  |
| Figure S6. The $^1\text{H-}^1\text{H}$ COSY spectrum of Clausenaside A (1) in $\text{DMSO-}d_6$ .....                | 9  |
| Figure S7. The experimental CD spectrum of Clausenaside A (1).....                                                   | 10 |
| Figure S8. The IR spectrum of Clausenaside A (1).....                                                                | 11 |
| Figure S9. The HRESIMS of Clausenaside A (1).....                                                                    | 12 |
| Figure S10. The $^1\text{H}$ NMR (400 MHz) spectrum of ( <i>S</i> )-(+)-tembamide (1a) in $\text{DMSO-}d_6$ .....    | 13 |
| Figure S11. The $^{13}\text{C}$ NMR (150 MHz) spectrum of ( <i>S</i> )-(+)-tembamide (1a) in $\text{DMSO-}d_6$ ..... | 14 |
| Figure S12. The experimental CD spectrum of ( <i>S</i> )-(+)-tembamide (1a).....                                     | 15 |
| Figure S13. The HRESIMS of ( <i>S</i> )-(+)-tembamide (1a).....                                                      | 16 |
| Figure S14. The $^1\text{H}$ NMR (600 MHz) spectrum of ( <i>S</i> )-MTPA-ester (1aa) in $\text{DMSO-}d_6$ .....      | 17 |
| Figure S15. The $^{13}\text{C}$ NMR (150 MHz) spectrum of ( <i>S</i> )-MTPA-ester (1aa) in $\text{DMSO-}d_6$ .....   | 18 |
| Figure S16. The HSQC spectrum of ( <i>S</i> )-MTPA-ester (1aa) in $\text{DMSO-}d_6$ .....                            | 19 |
| Figure S17. The HMBC spectrum of ( <i>S</i> )-MTPA-ester (1aa) in $\text{DMSO-}d_6$ .....                            | 20 |
| Figure S18. The $^1\text{H}$ NMR (600 MHz) spectrum of ( <i>R</i> )-MTPA-ester (1ab) in $\text{DMSO-}d_6$ .....      | 21 |
| Figure S19. The $^{13}\text{C}$ NMR (150 MHz) spectrum of ( <i>R</i> )-MTPA-ester (1ab) in $\text{DMSO-}d_6$ .....   | 22 |
| Figure S20. The HSQC spectrum of ( <i>R</i> )-MTPA-ester (1ab) in $\text{DMSO-}d_6$ .....                            | 23 |
| Figure S21. The HMBC spectrum of ( <i>R</i> )-MTPA-ester (1ab) in $\text{DMSO-}d_6$ .....                            | 24 |
| Figure S22. The $^1\text{H}$ NMR (400 MHz) spectrum of Clausenaside B (2) in $\text{DMSO-}d_6$ .....                 | 25 |
| Figure S23. The $^{13}\text{C}$ NMR (100 MHz) spectrum of Clausenaside B (2) in $\text{DMSO-}d_6$ .....              | 26 |
| Figure S24. The DEPT spectrum of Clausenaside B (2) in $\text{DMSO-}d_6$ .....                                       | 27 |
| Figure S25. The HSQC spectrum of Clausenaside B (2) in $\text{DMSO-}d_6$ .....                                       | 28 |
| Figure S26. The HMBC spectrum of Clausenaside B (2) in $\text{DMSO-}d_6$ .....                                       | 29 |
| Figure S27. The $^1\text{H-}^1\text{H}$ COSY spectrum of Clausenaside B (2) in $\text{DMSO-}d_6$ .....               | 30 |
| Figure S28. The experimental CD spectrum of Clausenaside B (2).....                                                  | 31 |
| Figure S29. The IR spectrum of Clausenaside B (2).....                                                               | 32 |
| Figure S30. The HRESIMS of Clausenaside B (2).....                                                                   | 33 |
| Figure S31. The $^1\text{H}$ NMR (400 MHz) spectrum of Clausenaside C (3) in $\text{DMSO-}d_6$ .....                 | 34 |
| Figure S32. The $^{13}\text{C}$ NMR (100 MHz) spectrum of Clausenaside C (3) in $\text{DMSO-}d_6$ .....              | 35 |
| Figure S33. The DEPT spectrum of Clausenaside C (3) in $\text{DMSO-}d_6$ .....                                       | 36 |
| Figure S34. The HSQC spectrum of Clausenaside C (3) in $\text{DMSO-}d_6$ .....                                       | 37 |
| Figure S35. The HMBC spectrum of Clausenaside C (3) in $\text{DMSO-}d_6$ .....                                       | 38 |
| Figure S36. The $^1\text{H-}^1\text{H}$ COSY spectrum of Clausenaside C (3) in $\text{DMSO-}d_6$ .....               | 39 |
| Figure S37. The experimental CD spectrum of Clausenaside C (3).....                                                  | 40 |
| Figure S38. The IR spectrum of Clausenaside C (3).....                                                               | 41 |
| Figure S39. The HRESIMS of Clausenaside C (3).....                                                                   | 42 |
| Figure S40. The $^1\text{H}$ NMR (600 MHz) spectrum of Clausenaside D (4) in $\text{DMSO-}d_6$ .....                 | 43 |
| Figure S41. The $^{13}\text{C}$ NMR (150 MHz) spectrum of Clausenaside D (4) in $\text{DMSO-}d_6$ .....              | 44 |
| Figure S42. The DEPT spectrum of Clausenaside D (4) in $\text{DMSO-}d_6$ .....                                       | 45 |

|                                                                                                                                                           |    |
|-----------------------------------------------------------------------------------------------------------------------------------------------------------|----|
| Figure S43. The HSQC spectrum of Clausenaside D (4) in DMSO- <i>d</i> <sub>6</sub> .....                                                                  | 46 |
| Figure S44. The HMBC spectrum of Clausenaside D (4) in DMSO- <i>d</i> <sub>6</sub> .....                                                                  | 47 |
| Figure S45. The <sup>1</sup> H- <sup>1</sup> H COSY spectrum of Clausenaside D (4) in DMSO- <i>d</i> <sub>6</sub> .....                                   | 48 |
| Figure S46. The IR spectrum of Clausenaside D (4).....                                                                                                    | 49 |
| Figure S47. The HRESIMS of Clausenaside D (4).....                                                                                                        | 50 |
| Figure S48. The <sup>1</sup> H NMR (600 MHz) spectrum of Clausenaside E (5) in DMSO- <i>d</i> <sub>6</sub> .....                                          | 51 |
| Figure S49. The <sup>13</sup> C NMR (150 MHz) spectrum of Clausenaside E (5) in DMSO- <i>d</i> <sub>6</sub> .....                                         | 52 |
| Figure S50. The DEPT spectrum of Clausenaside E (5) in DMSO- <i>d</i> <sub>6</sub> .....                                                                  | 53 |
| Figure S51. The HSQC spectrum of Clausenaside E (5) in DMSO- <i>d</i> <sub>6</sub> .....                                                                  | 54 |
| Figure S52. The HMBC spectrum of Clausenaside E (5) in DMSO- <i>d</i> <sub>6</sub> .....                                                                  | 55 |
| Figure S53. The <sup>1</sup> H- <sup>1</sup> H COSY spectrum of Clausenaside E (5) in DMSO- <i>d</i> <sub>6</sub> .....                                   | 56 |
| Figure S54. The IR spectrum of Clausenaside E (5).....                                                                                                    | 57 |
| Figure S55. The HRESIMS of Clausenaside E (5).....                                                                                                        | 58 |
| Figure S56. The <sup>1</sup> H NMR (600 MHz) spectrum of Clausenaside F (6) in MeOH- <i>d</i> <sub>4</sub> .....                                          | 59 |
| Figure S57. The <sup>13</sup> C NMR (150 MHz) spectrum of Clausenaside F (6) in MeOH- <i>d</i> <sub>4</sub> .....                                         | 60 |
| Figure S58. The HSQC spectrum of Clausenaside F (6) in MeOH- <i>d</i> <sub>4</sub> .....                                                                  | 61 |
| Figure S59. The HMBC spectrum of Clausenaside F (6) in MeOH- <i>d</i> <sub>4</sub> .....                                                                  | 62 |
| Figure S60. The <sup>1</sup> H- <sup>1</sup> H COSY spectrum of Clausenaside F (6) in MeOH- <i>d</i> <sub>4</sub> .....                                   | 63 |
| Figure S61. The IR spectrum of Clausenaside F (6).....                                                                                                    | 64 |
| Figure S62. The HRESIMS of Clausenaside F (6).....                                                                                                        | 65 |
| Figure S63. The <sup>1</sup> H NMR (600 MHz) spectrum of Clausenaside G (7) in DMSO- <i>d</i> <sub>6</sub> .....                                          | 66 |
| Figure S64. The <sup>13</sup> C NMR (150 MHz) spectrum of Clausenaside G (7) in DMSO- <i>d</i> <sub>6</sub> .....                                         | 67 |
| Figure S65. The HSQC spectrum of Clausenaside G (7) in DMSO- <i>d</i> <sub>6</sub> .....                                                                  | 68 |
| Figure S66. The HMBC spectrum of Clausenaside G (7) in DMSO- <i>d</i> <sub>6</sub> .....                                                                  | 69 |
| Figure S67. The <sup>1</sup> H- <sup>1</sup> H COSY spectrum of Clausenaside G (7) in DMSO- <i>d</i> <sub>6</sub> .....                                   | 70 |
| Figure S68. The IR spectrum of Clausenaside G (7).....                                                                                                    | 71 |
| Figure S69. The HRESIMS of Clausenaside G (7).....                                                                                                        | 72 |
| Figure S70. Two conformations of Clausenaside G (7).....                                                                                                  | 73 |
| Figure S71. Calculated ECD spectra of 3 <i>S</i> (7a), Calculated ECD spectra of 3 <i>R</i> (7b) and experimental ECD spectrum of Clausenaside G (7)..... | 74 |
| Figure S72. The <sup>1</sup> H NMR (400 MHz) spectrum of Clausenaside H (8) in DMSO- <i>d</i> <sub>6</sub> .....                                          | 75 |
| Figure S73. The <sup>13</sup> C NMR (100 MHz) spectrum of Clausenaside H (8) in DMSO- <i>d</i> <sub>6</sub> .....                                         | 76 |
| Figure S74. The DEPT spectrum of Clausenaside H (8) in DMSO- <i>d</i> <sub>6</sub> .....                                                                  | 77 |
| Figure S75. The HSQC spectrum of Clausenaside H (8) in DMSO- <i>d</i> <sub>6</sub> .....                                                                  | 78 |
| Figure S76. The HMBC spectrum of Clausenaside H (8) in DMSO- <i>d</i> <sub>6</sub> .....                                                                  | 79 |
| Figure S77. The <sup>1</sup> H- <sup>1</sup> H COSY spectrum of Clausenaside H (8) in DMSO- <i>d</i> <sub>6</sub> .....                                   | 80 |
| Figure S78. The NOE difference spectrum of Clausenaside H (8) in DMSO- <i>d</i> <sub>6</sub> .....                                                        | 81 |
| Figure S73. The IR spectrum of Clausenaside H (8).....                                                                                                    | 82 |
| Figure S74. The HRESIMS of Clausenaside H (8).....                                                                                                        | 83 |

**Figure S1. The  $^1\text{H}$  NMR (400 MHz) spectrum of Clausenaside A (1) in  $\text{DMSO-}d_6$**

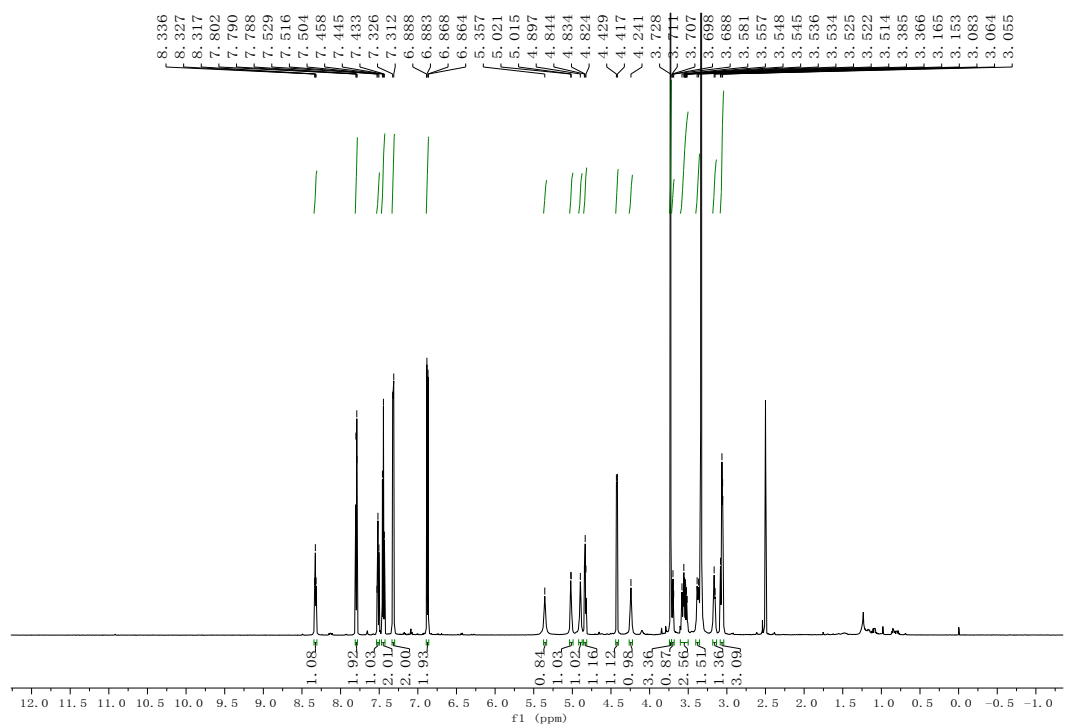

Figure S2. The  $^{13}\text{C}$  NMR (100 MHz) spectrum of Clausenaside A (1) in  $\text{DMSO-}d_6$

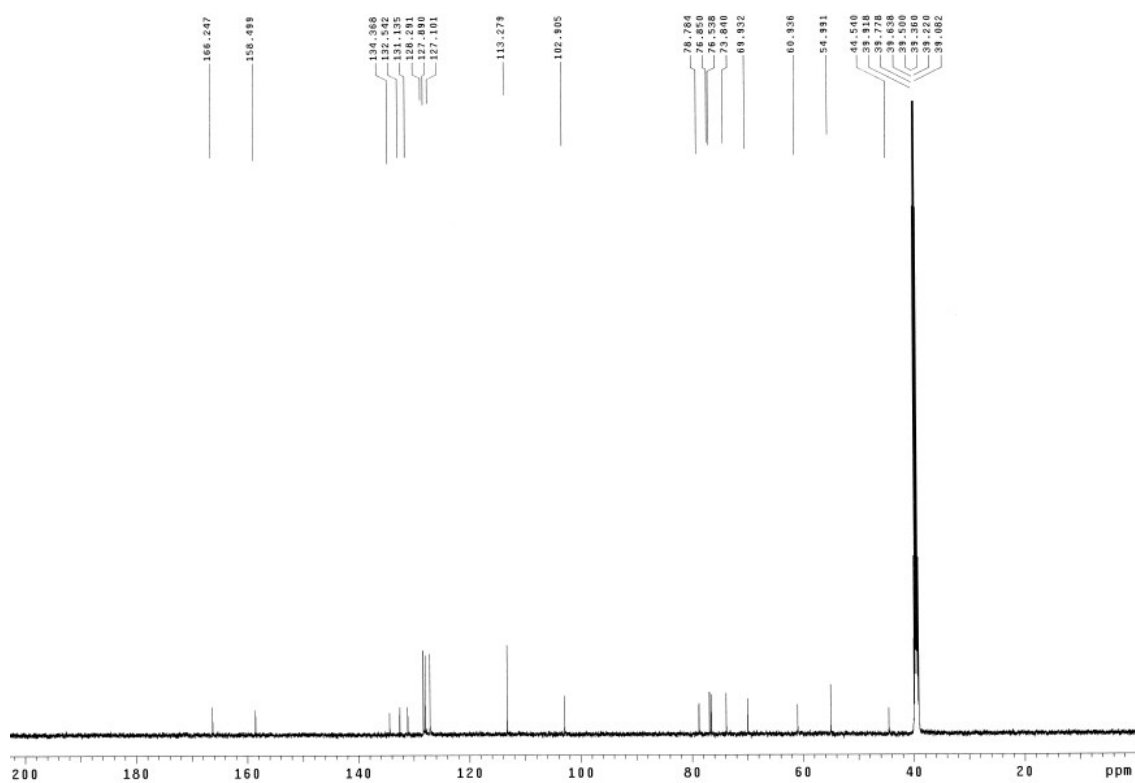

**Figure S3. The DEPT spectrum of Clausenaside A (1) in DMSO- $d_6$**

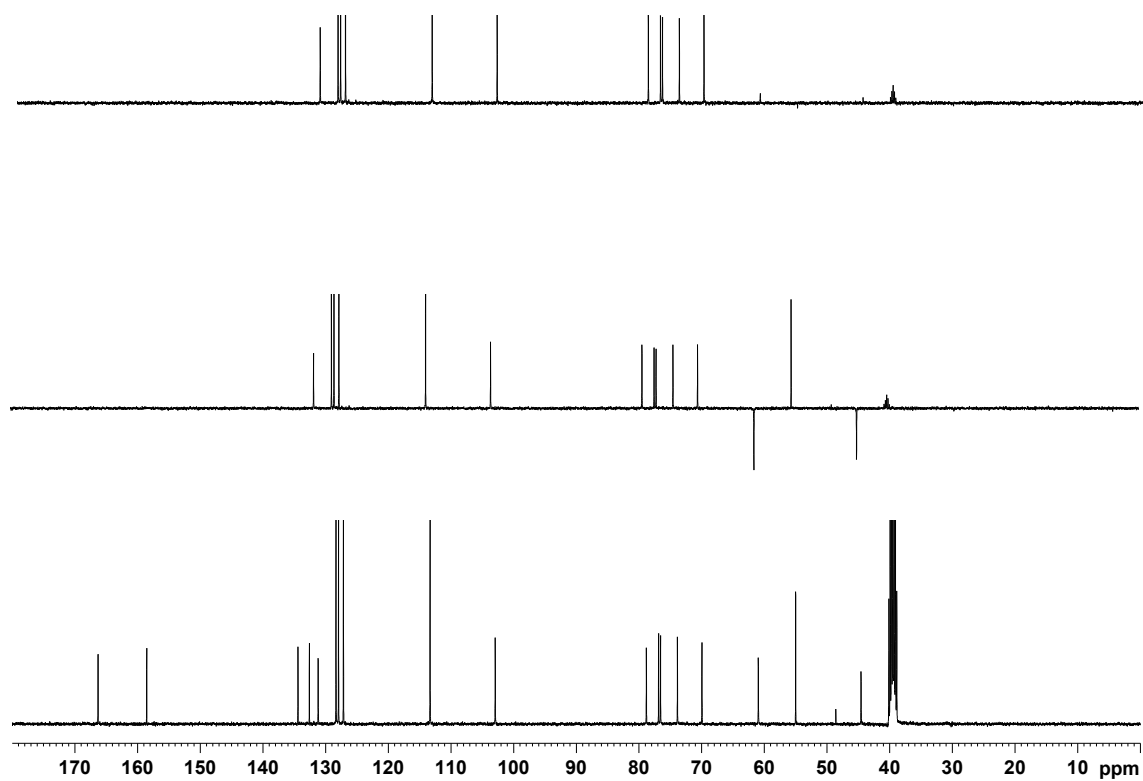

Figure S4. The HSQC spectrum of Clausenaside A (1) in DMSO- $d_6$

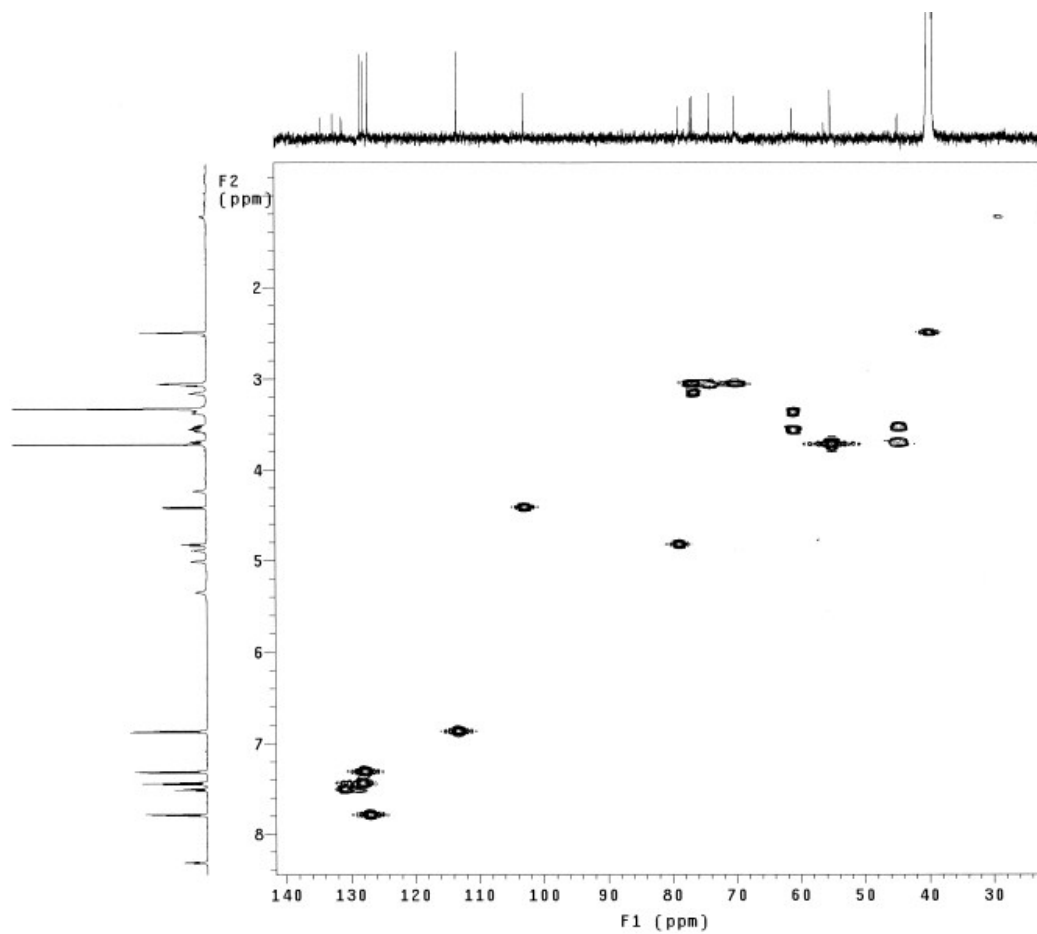

Figure S5. The HMBC spectrum of Clausenaside A (1) in DMSO- $d_6$

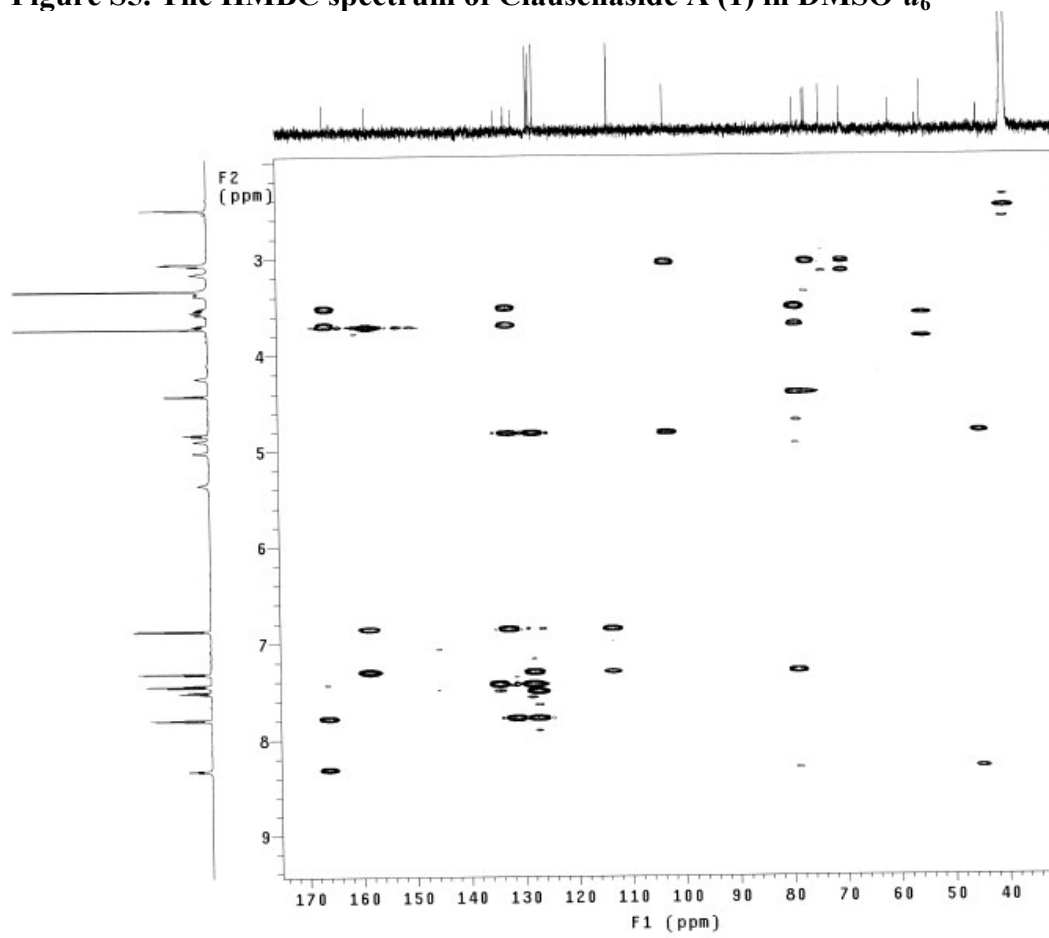





**Figure S7. The experimental CD spectrum of Clausenaside A (1)**

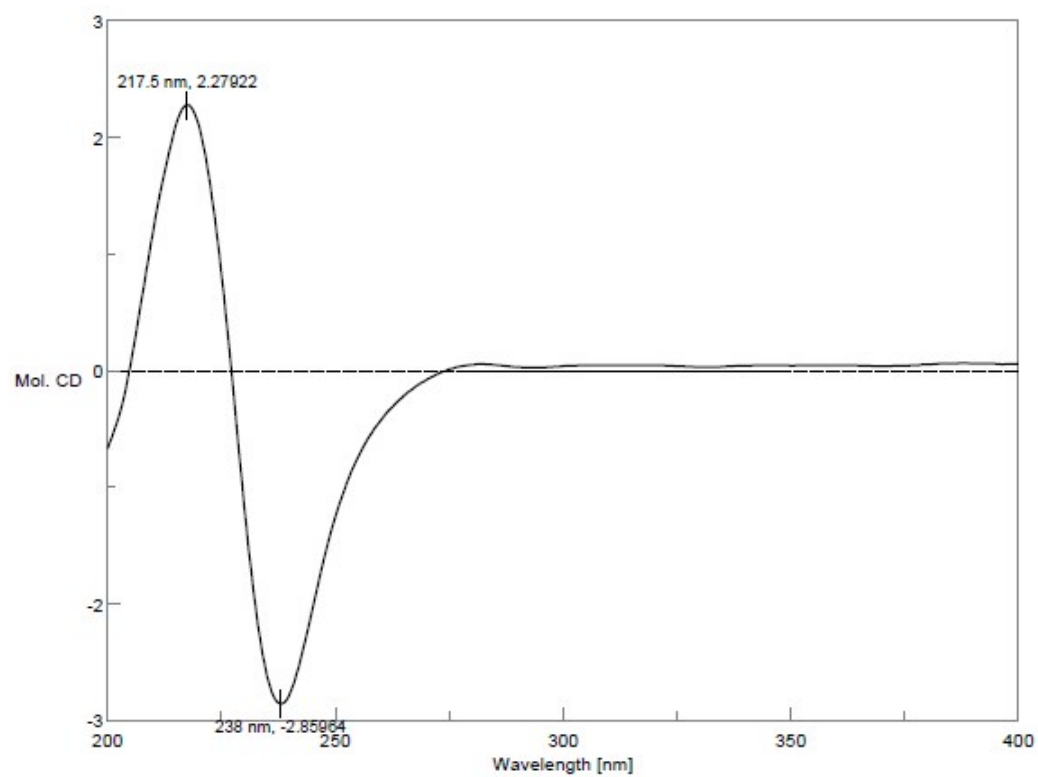

Figure S8. The IR spectrum of Clausenaside A (1)

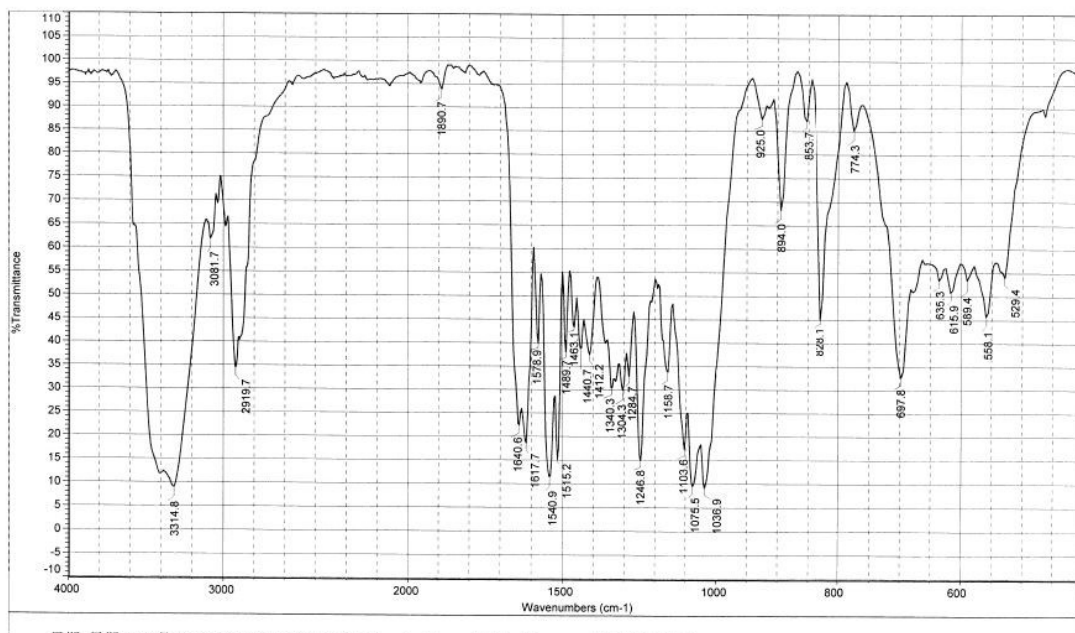

## Figure S9. The HRESIMS of Clausenaside A (1)

MS Formula Results: + Scan (5.735 min) Sub (2014011001.d)

| m/z      | Ion                 | Formula          | Abundance |       |         |          |            |            |                |             |             |            |          |     |
|----------|---------------------|------------------|-----------|-------|---------|----------|------------|------------|----------------|-------------|-------------|------------|----------|-----|
| 456.1634 | (M+Na) <sup>+</sup> | C22 H27 N Na O8  | 499566.3  |       |         |          |            |            |                |             |             |            |          |     |
| Best     | Formula (M)         | Ion Formula      | Calc m/z  | Score | Cross S | Mass     | Calc. Mass | Diff (ppm) | Abs Diff (ppm) | Abund Match | Spacing Mat | Mass Match | m/z      | DBE |
| •        | ☑                   | C22 H27 N O8     | 456.1629  | 99.97 |         | 433.1741 | 433.1737   | -1.09      | 1.09           | 99.99       | 99.94       | 99.96      | 456.1634 | 10  |
| •        | ☐                   | C23 H23 N5 O4    | 456.1642  | 99.79 |         | 433.1741 | 433.1735   | 1.98       | 1.98           | 99.43       | 99.39       | 99.88      | 456.1634 | 15  |
| •        | ☐                   | C23 H31 N O3 S2  | 456.1638  | 97.45 |         | 433.1741 | 433.1745   | 0.9        | 0.9            | 91.52       | 99.52       | 99.98      | 456.1634 | 9   |
| •        | ☐                   | C14 H31 N3 O10 S | 456.1622  | 97.41 |         | 433.1741 | 433.173    | -2.61      | 2.61           | 91.57       | 99.65       | 99.70      | 456.1634 | 1   |

**Figure S10.** The  $^1\text{H}$  NMR (400 MHz) spectrum of (*S*)-(+)-tembamide (**1a**) in  $\text{DMSO-}d_6$

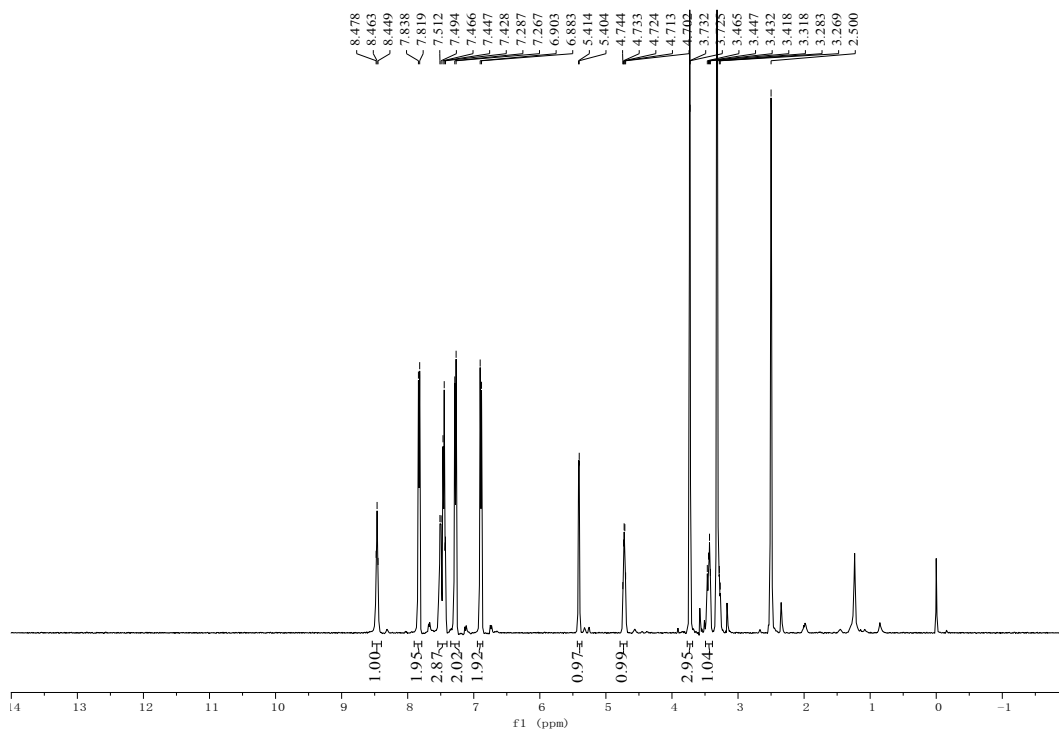

Figure S11. The  $^{13}\text{C}$  NMR (150 MHz) spectrum of (*S*)-(+)-tembamide (**1a**) in  $\text{DMSO-}d_6$

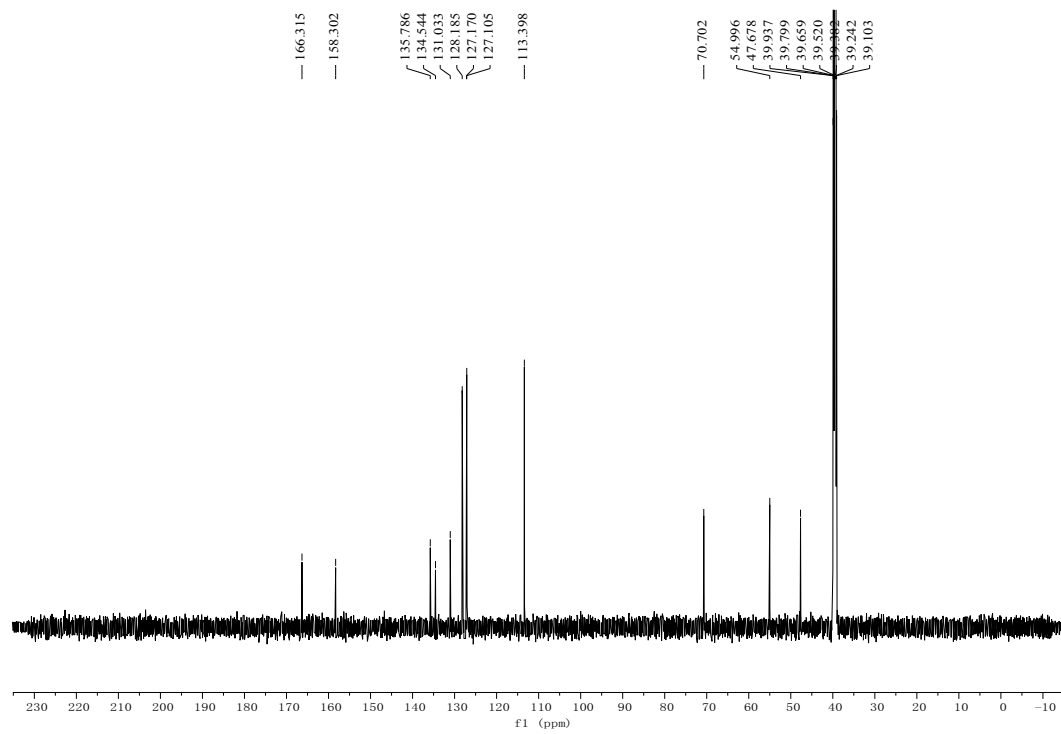

**Figure S12.** The experimental CD spectrum of (*S*)-(+)-tembamide (**1a**)

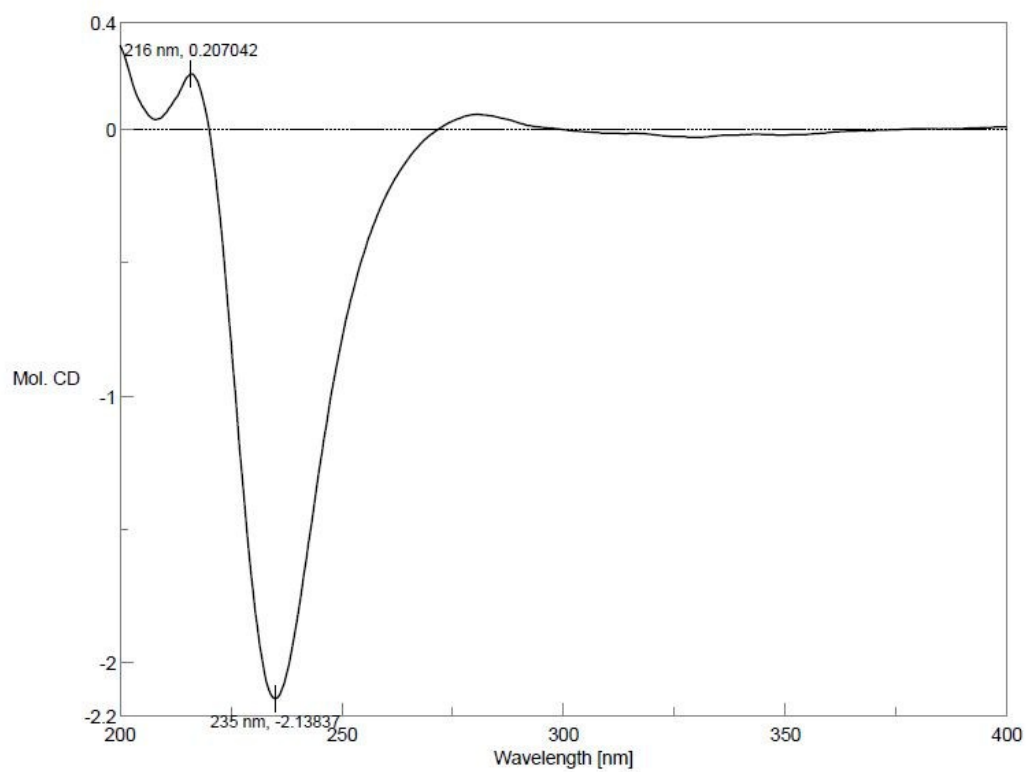

### Figure S13. The HRESIMS of (*S*)-(+)-tembamide (1a)

MS Formula Results: + Scan (5.910 min) Sub (2015010601.d)

| m/z      | Ion                 | Formula             | Abundance |           |          |           |          |            |                |            |             |               |     |
|----------|---------------------|---------------------|-----------|-----------|----------|-----------|----------|------------|----------------|------------|-------------|---------------|-----|
| 294.1109 | (M+Na) <sup>+</sup> | C16 H17 N Na O3     | 792599.5  |           |          |           |          |            |                |            |             |               |     |
| Best     | Formula (M)         | Ion Formula         | Score     | Cross Sco | Mass     | Calc Mass | Calc m/z | Diff (ppm) | Abs Diff (ppm) | Mass Match | Abund Match | Spacing Match | DBE |
| ✓        | C16 H17 N O3        | C16 H17 N Na O3     | 99.85     |           | 271.1217 | 271.1208  | 294.1101 | -3.05      | 3.05           | 99.76      | 99.94       | 99.94         | 9   |
| •        | C13 H18 F N O4      | C13 H18 F N Na O4   | 99.43     |           | 271.1217 | 271.122   | 294.1112 | 1.17       | 1.17           | 99.96      | 98.11       | 99.94         | 5   |
| •        | C13 H22 F N S Si    | C13 H22 F N Na S Si | 97.39     |           | 271.1217 | 271.1226  | 294.1118 | 3.5        | 3.5            | 99.68      | 91.75       | 99.59         | 4   |



**Figure S14.** The  $^1\text{H}$  NMR (600 MHz) spectrum of (*S*)-MTPA-ester (1aa) in  $\text{DMSO-}d_6$

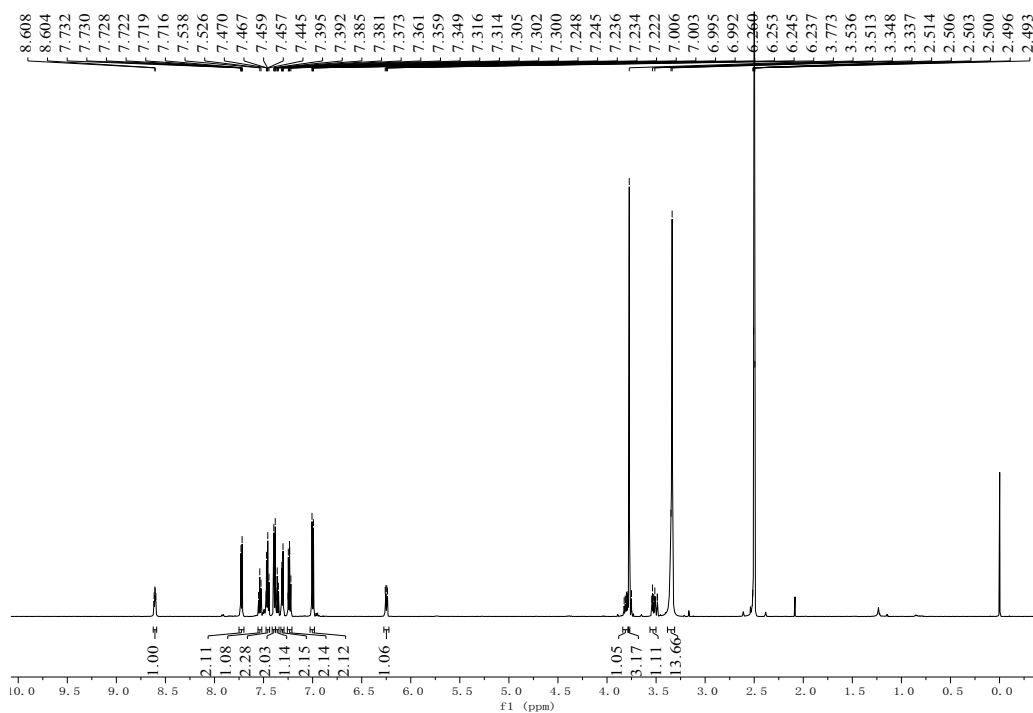

**Figure S15.** The  $^{13}\text{C}$  NMR (150 MHz) spectrum of (*S*)-MTPA-ester (1aa) in  $\text{DMSO-}d_6$

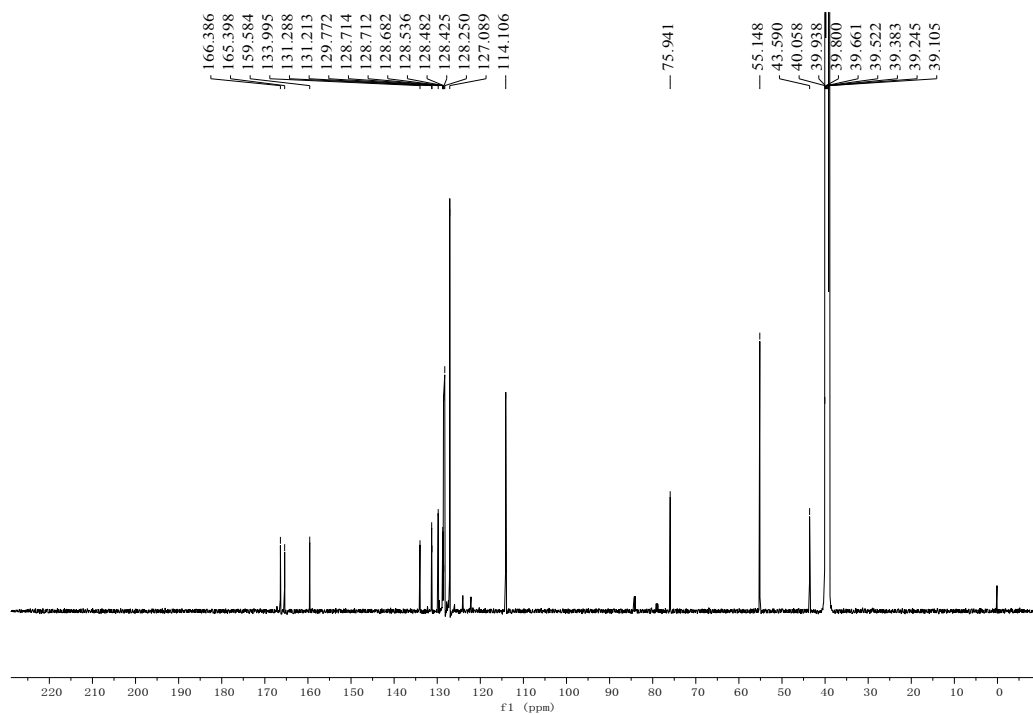

**Figure S16. The HSQC spectrum of (*S*)-MTPA-ester (1aa) in DMSO-*d*<sub>6</sub>**

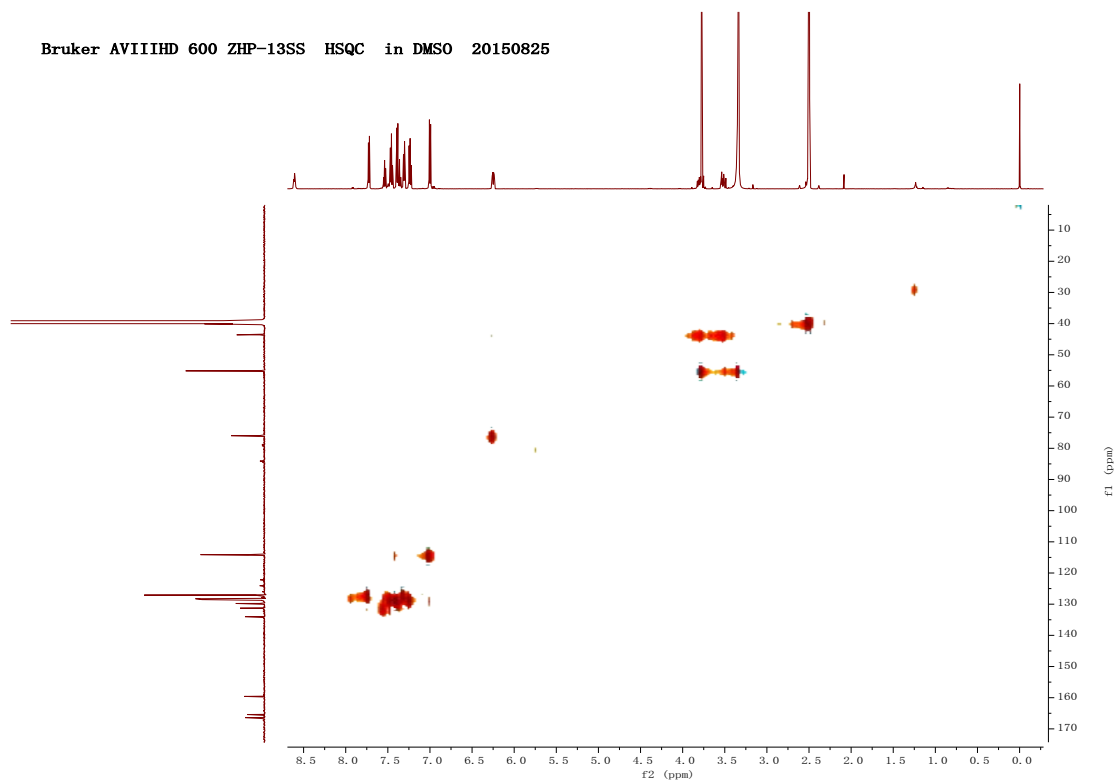

**Figure S17. The HMBC spectrum of (*S*)-MTPA-ester (1aa) in DMSO-*d*<sub>6</sub>**

Bruker AVIIIHD 600 ZHP-13SS HMBC in DMSO 20150825

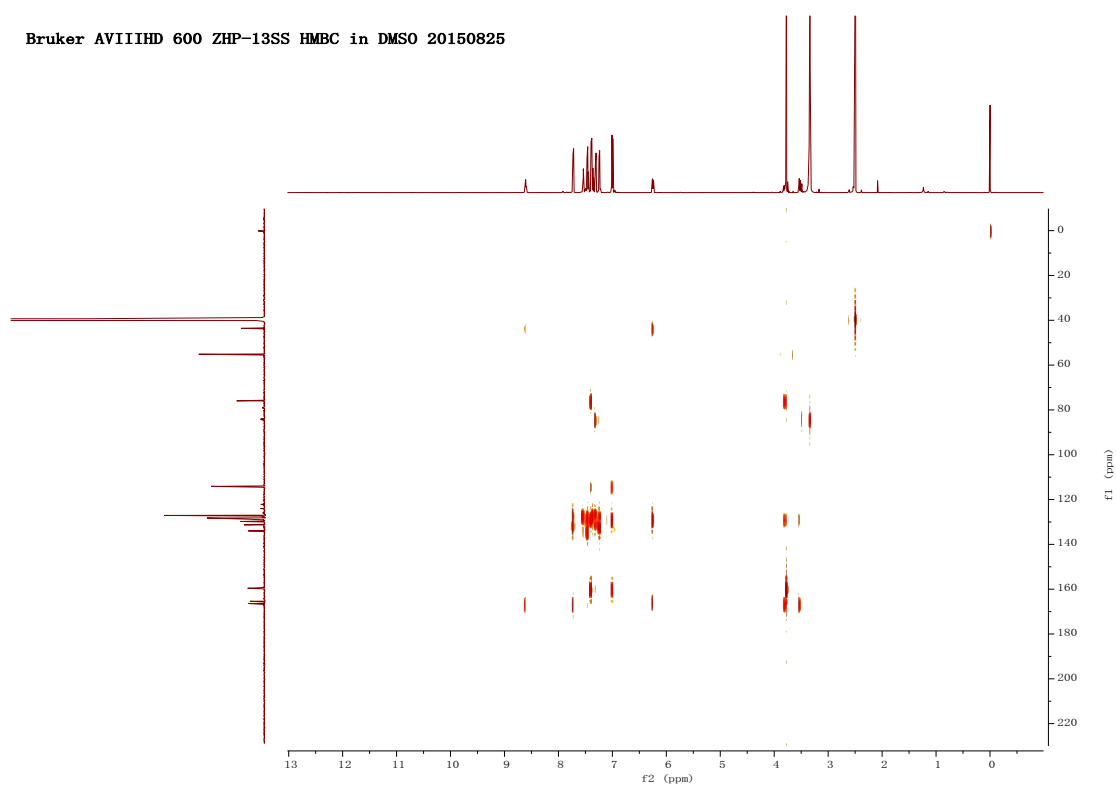

**Figure S18.** The  $^1\text{H}$  NMR (600 MHz) spectrum of (*R*)-MTPA-ester (**1ab**) in  $\text{DMSO}-d_6$

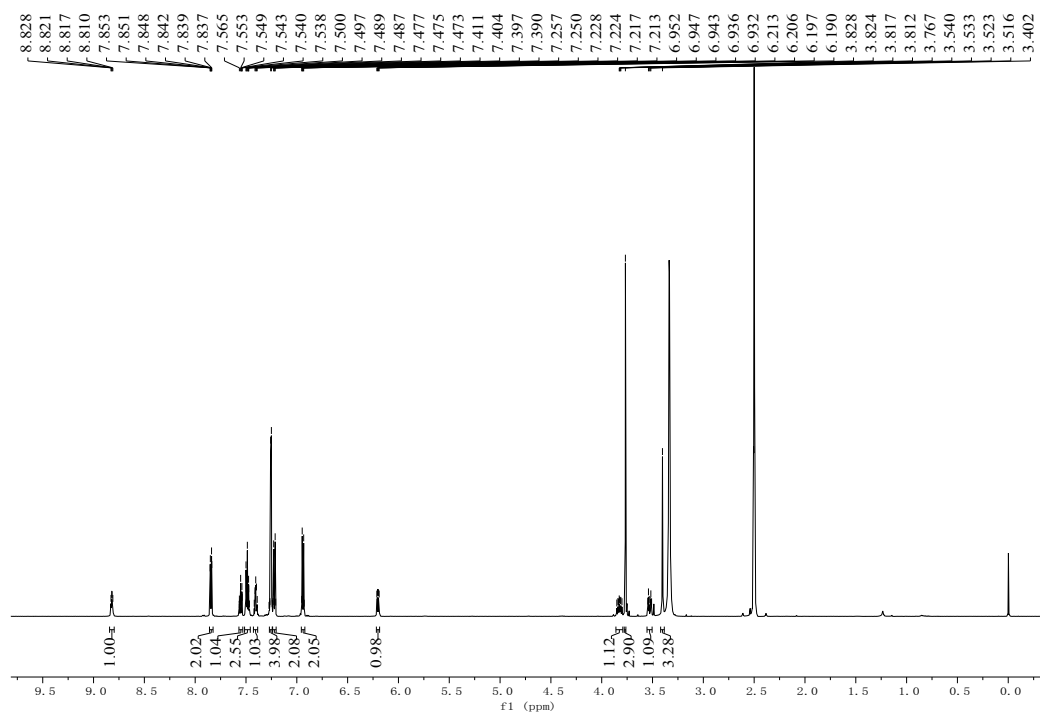

**Figure S19.** The  $^{13}\text{C}$  NMR (150 MHz) spectrum of (*R*)-MTPA-ester (**1ab**) in  $\text{DMSO-}d_6$

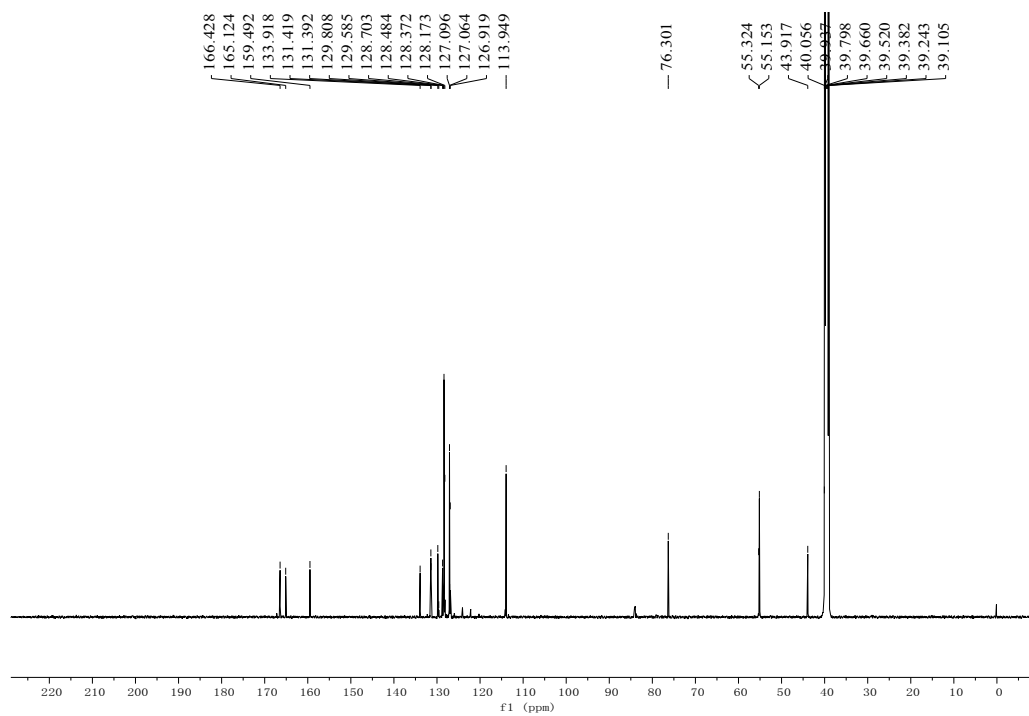

**Figure S20. The HSQC spectrum of (*R*)-MTPA-ester (1ab) in DMSO-*d*<sub>6</sub>**

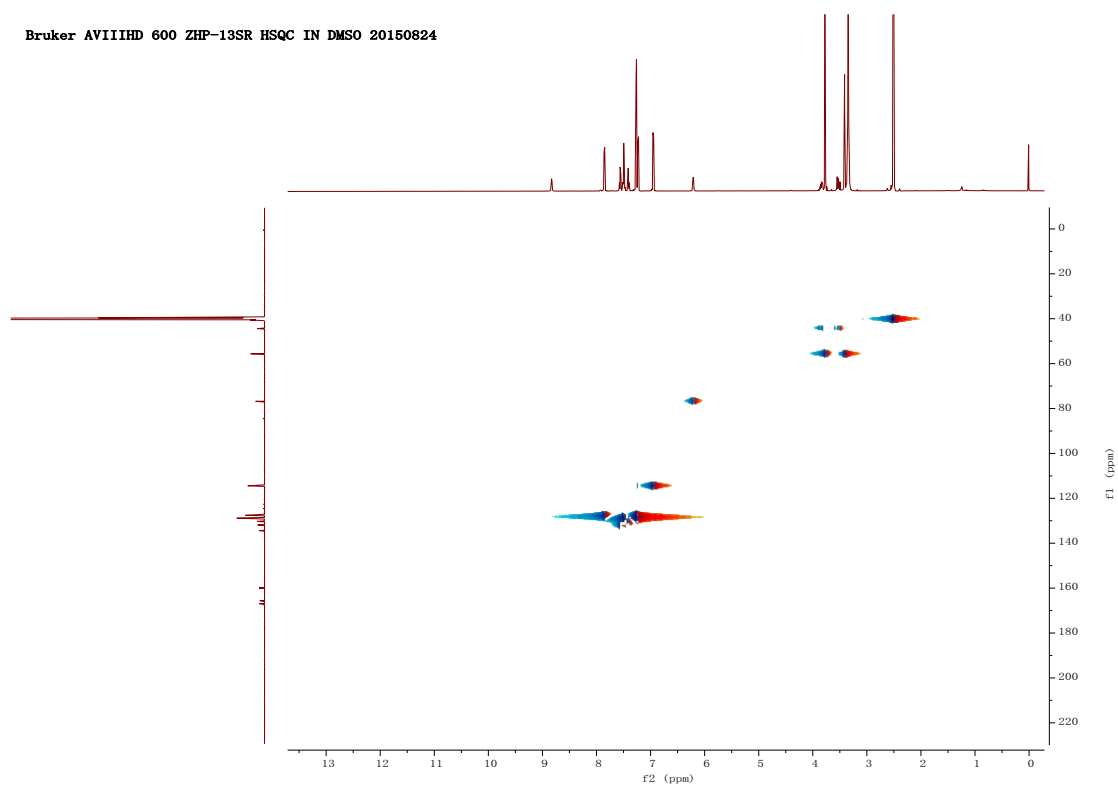

**Figure S21. The HMBC spectrum of (*R*)-MTPA-ester (1ab) in DMSO-*d*<sub>6</sub>**

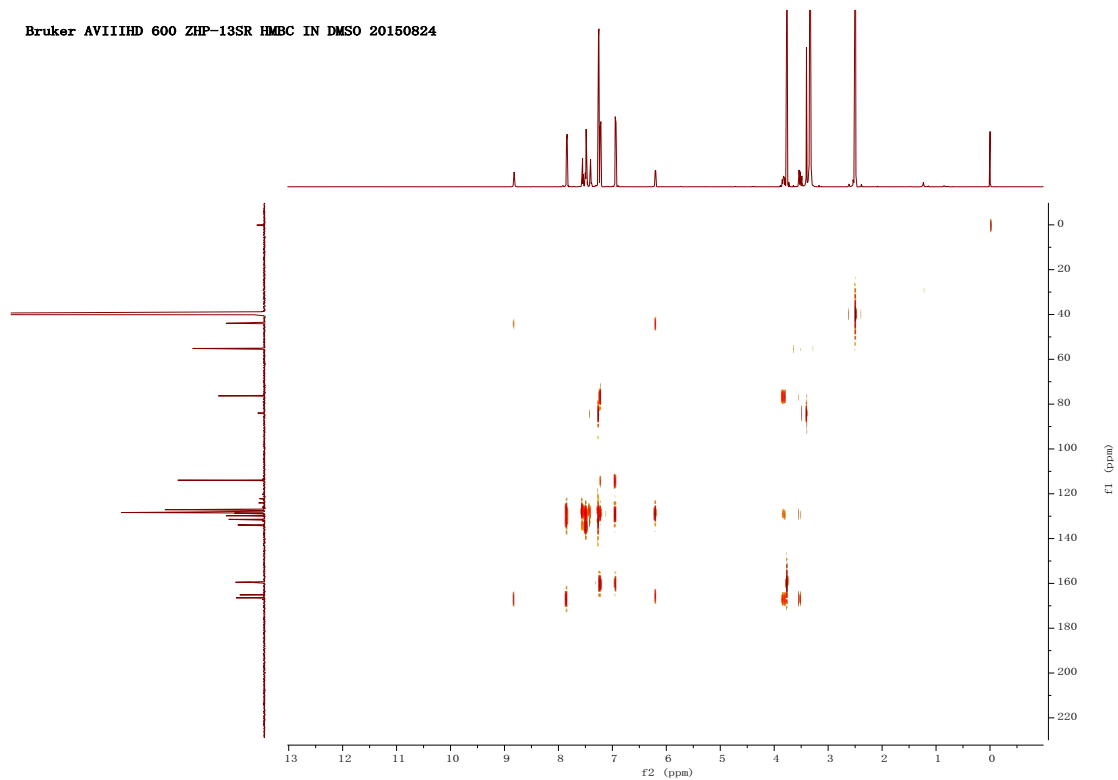



Figure S22. The  $^1\text{H}$  NMR (400 MHz) spectrum of Clausenaside B (2) in DMSO-

$d_6$

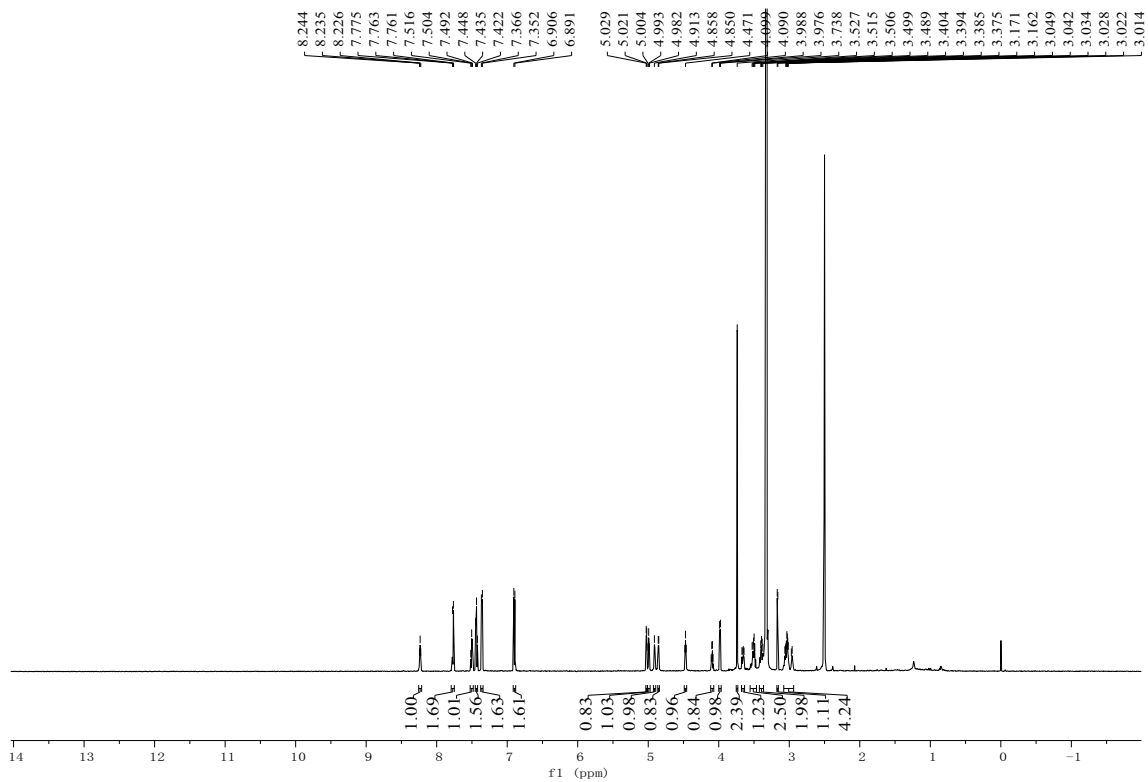

Figure S23. The  $^{13}\text{C}$  NMR (100 MHz) spectrum of Clausenaside B (2) in  $\text{DMSO-}d_6$

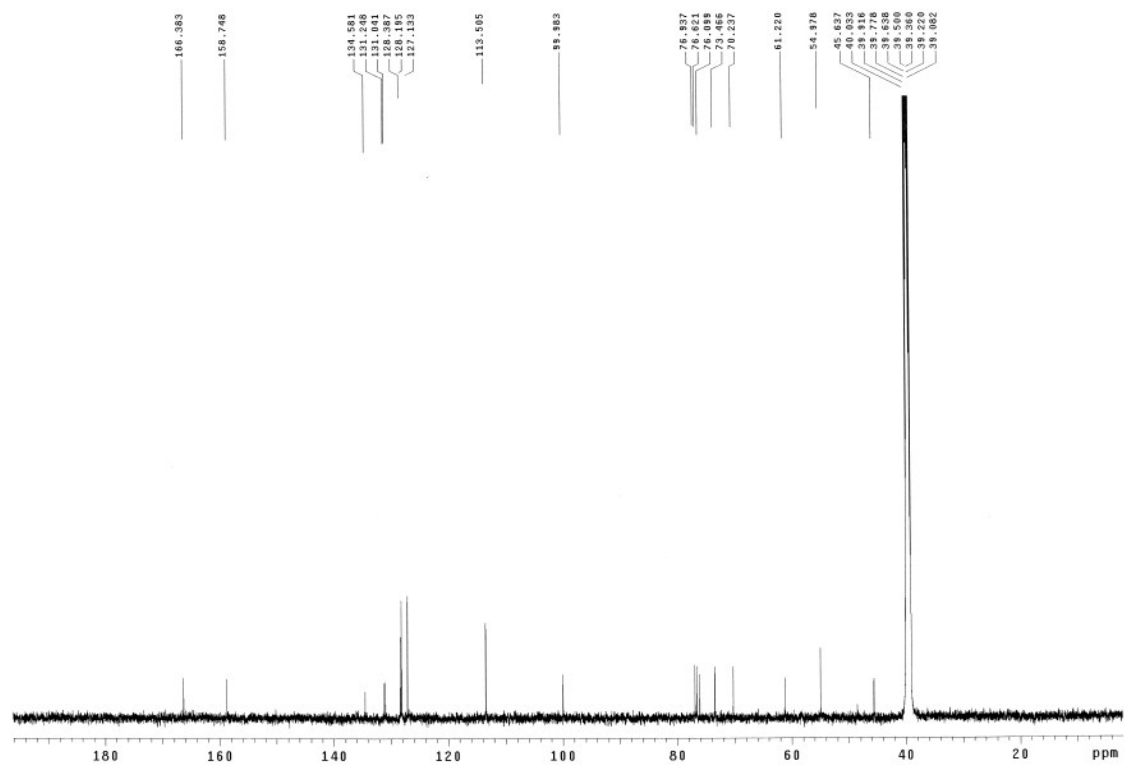

**Figure S24. The DEPT spectrum of Clausenaside B (2) in DMSO-*d*<sub>6</sub>**

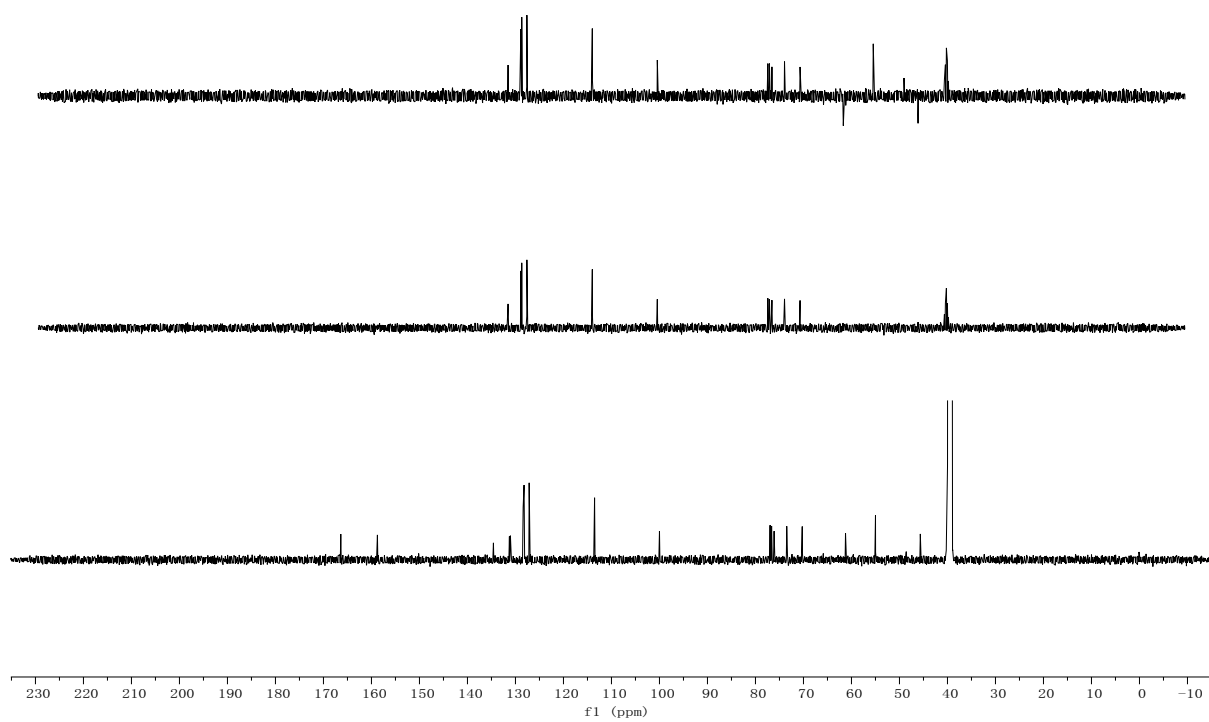

Figure S25. The HSQC spectrum of Clausenaside B (2) in DMSO-*d*<sub>6</sub>

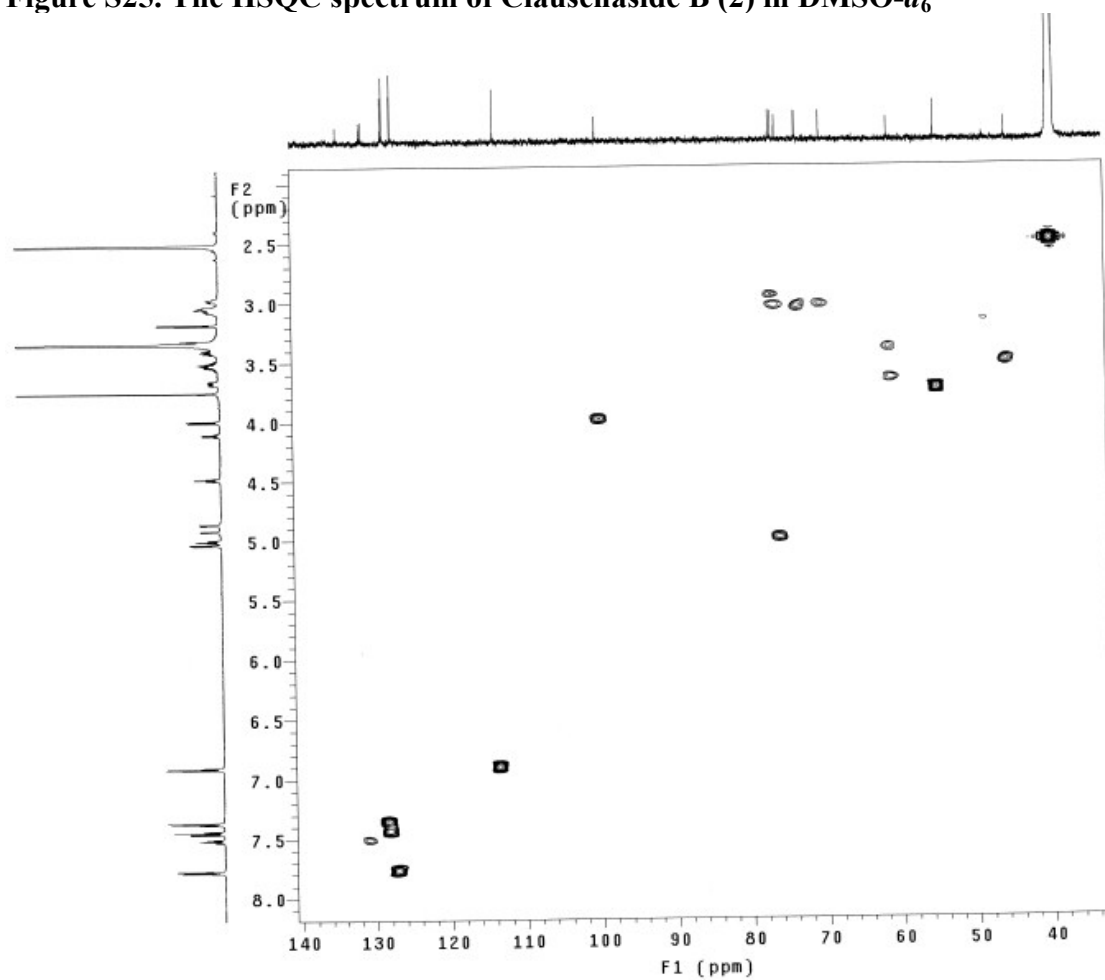

Figure S26. The HMBC spectrum of Clausenaside B (2) in DMSO-*d*<sub>6</sub>

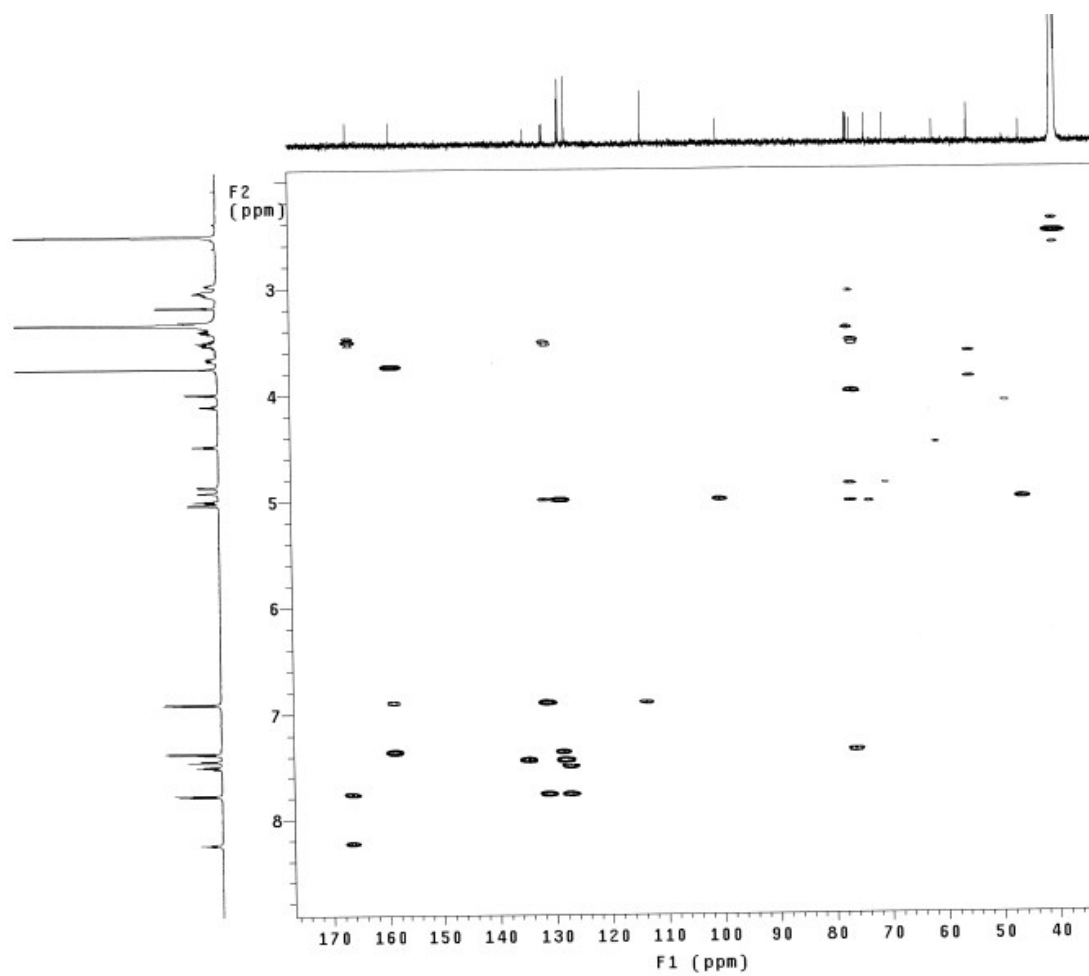

Figure S27. The  $^1\text{H}$ - $^1\text{H}$  COSY spectrum of Clausenaside B (2) in  $\text{DMSO-}d_6$

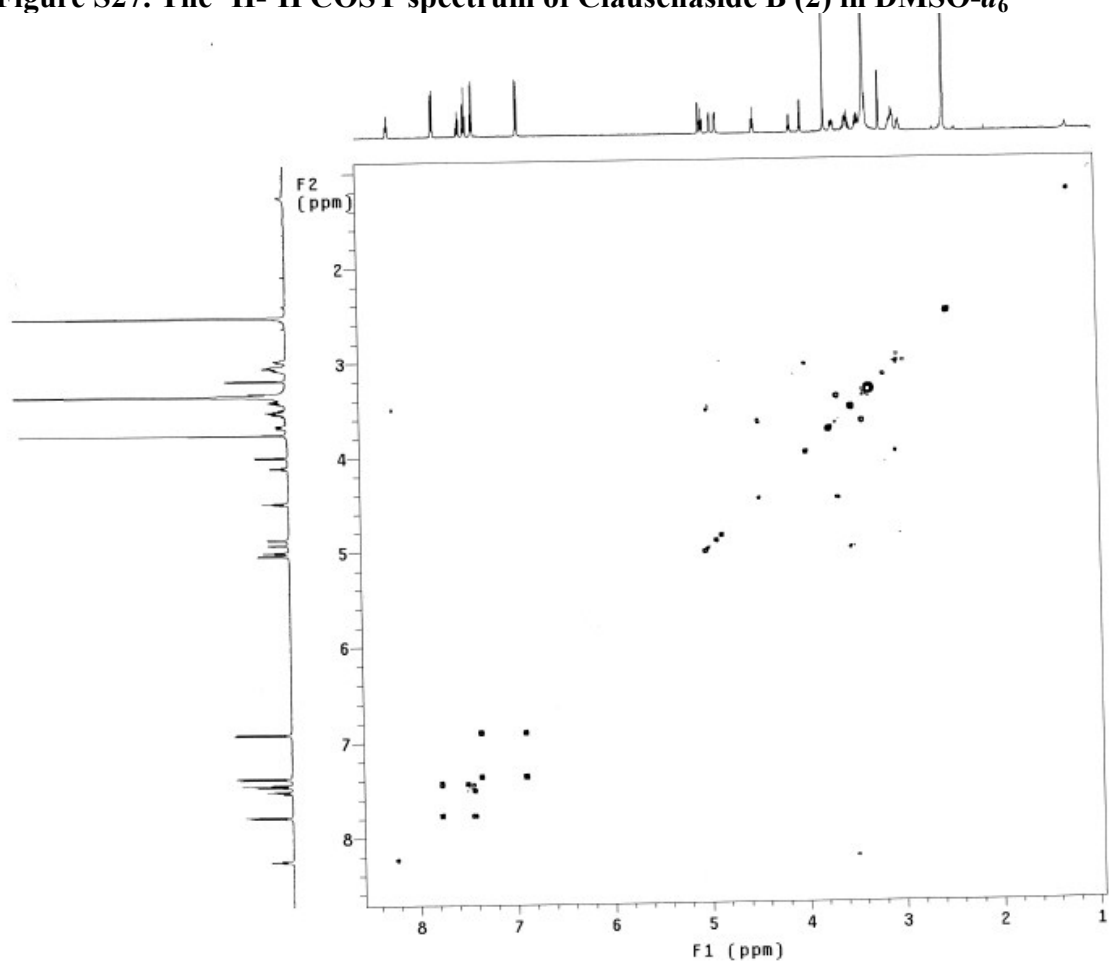

**Figure S28. The experimental CD spectrum of Clausenaside B (2)**

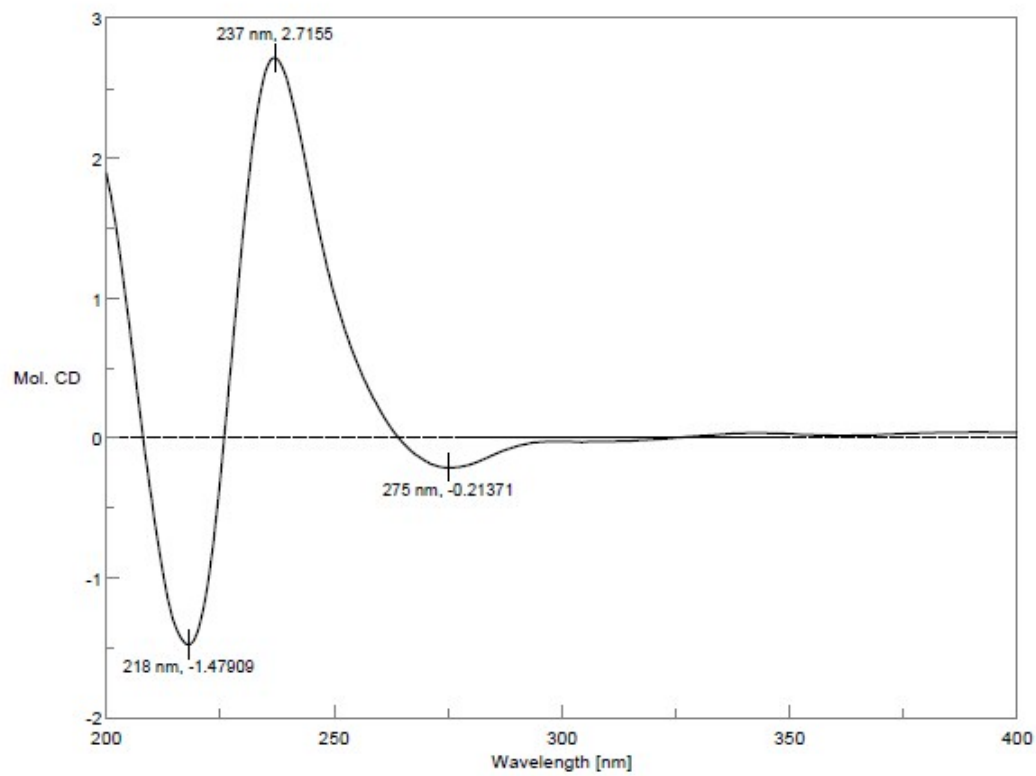

Figure S29. The IR spectrum of Clausenaside B (2)

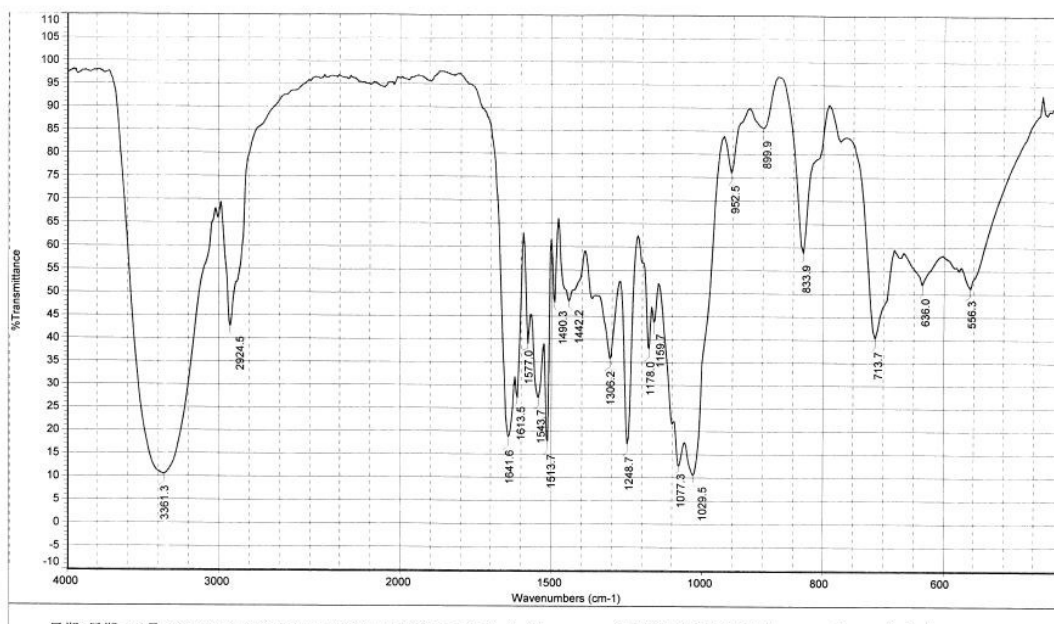



# Figure S30. The HRESIMS of Clausenaside B (2)

MS Formula Results: + Scan (5.615 min) Sub (2014121501.d)

| m/z      | Ion     | Formula              | Abundance |      |             |             |       |           |          |           |          |            |                |            |             |               |     |
|----------|---------|----------------------|-----------|------|-------------|-------------|-------|-----------|----------|-----------|----------|------------|----------------|------------|-------------|---------------|-----|
| 456.1635 | (M+Na)+ | C22 H27 N Na O8      | 1592229.4 | Best | Formula (M) | Ion Formula | Score | Cross Sco | Mass     | Calc Mass | Calc m/z | Diff (ppm) | Abs Diff (ppm) | Mass Match | Abund Match | Spacing Match | DBE |
|          |         | C22 H27 N Na O8      | 99.93     |      |             |             |       |           | 433.1743 | 433.1737  | 456.1629 | -1.5       | 1.5            | 99.93      | 99.9        | 99.97         | 10  |
|          |         | C19 H28 F N O9       | 99.49     |      |             |             |       |           | 433.1743 | 433.1748  | 456.164  | 1.14       | 1.14           | 99.96      | 98.31       | 99.97         | 6   |
|          |         | C21 H28 N3 O5 P      | 99.49     |      |             |             |       |           | 433.1743 | 433.1767  | 456.1659 | 5.4        | 5.4            | 99.11      | 99.74       | 99.93         | 10  |
|          |         | C22 H29 F N3 O P S   | 99.43     |      |             |             |       |           | 433.1743 | 433.1753  | 456.1645 | 2.26       | 2.26           | 99.84      | 98.66       | 99.54         | 10  |
|          |         | C21 H29 F N3 O2 P Si | 99.4      |      |             |             |       |           | 433.1743 | 433.1751  | 456.1643 | 1.71       | 1.71           | 99.91      | 98.43       | 99.56         | 10  |
|          |         | C25 H28 N3 P S       | 99.32     |      |             |             |       |           | 433.1743 | 433.1742  | 456.1634 | -0.38      | 0.38           | 100        | 97.93       | 99.61         | 14  |
|          |         | C25 H25 F N3 O P     | 99.3      |      |             |             |       |           | 433.1743 | 433.1719  | 456.1611 | -5.52      | 5.52           | 99.08      | 99.16       | 99.93         | 15  |
|          |         | C23 H28 F N O4 S     | 99.05     |      |             |             |       |           | 433.1743 | 433.1723  | 456.1615 | -4.64      | 4.64           | 99.35      | 98.08       | 99.64         | 10  |
|          |         | C18 H31 N O9 Si      | 98.95     |      |             |             |       |           | 433.1743 | 433.1768  | 456.166  | 5.72       | 5.72           | 99.01      | 98.31       | 99.59         | 5   |
|          |         | C22 H28 F N O5 Si    | 98.9      |      |             |             |       |           | 433.1743 | 433.1721  | 456.1613 | -5.19      | 5.19           | 99.18      | 97.81       | 99.65         | 10  |
|          |         | C24 H28 N3 O P Si    | 98.82     |      |             |             |       |           | 433.1743 | 433.1739  | 456.1631 | -0.93      | 0.93           | 99.97      | 96.21       | 99.63         | 14  |
|          |         | C13 H31 N3 O11 Si    | 98.46     |      |             |             |       |           | 433.1743 | 433.1728  | 456.162  | -3.58      | 3.58           | 99.61      | 95.78       | 99.38         | 1   |
|          |         | C19 H32 F N O5 S Si  | 97.87     |      |             |             |       |           | 433.1743 | 433.1754  | 456.1647 | 2.58       | 2.58           | 99.8       | 93.48       | 99.28         | 5   |
|          |         | C22 H31 N O4 S Si    | 97.74     |      |             |             |       |           | 433.1743 | 433.1743  | 456.1635 | -0.05      | 0.05           | 100        | 92.61       | 99.36         | 9   |
|          |         | C23 H31 N O3 S2      | 97.59     |      |             |             |       |           | 433.1743 | 433.1745  | 456.1638 | 0.5        | 0.5            | 99.99      | 92.1        | 99.36         | 9   |
|          |         | C20 H32 F N O4 S2    | 97.22     |      |             |             |       |           | 433.1743 | 433.1757  | 456.1649 | 3.13       | 3.13           | 99.7       | 91.38       | 99.29         | 5   |
|          |         | C15 H36 N O7 P S Si  | 97.1      |      |             |             |       |           | 433.1743 | 433.1719  | 456.1612 | -5.53      | 5.53           | 99.07      | 92.09       | 99.16         | 0   |
|          |         | C14 H31 N3 O10 S     | 97.03     |      |             |             |       |           | 433.1743 | 433.173   | 456.1622 | -3.02      | 3.02           | 99.72      | 90.53       | 99.44         | 1   |

Figure S31. The  $^1\text{H}$  NMR (400 MHz) spectrum of Clausenaside C (3) in  $\text{DMSO-}d_6$

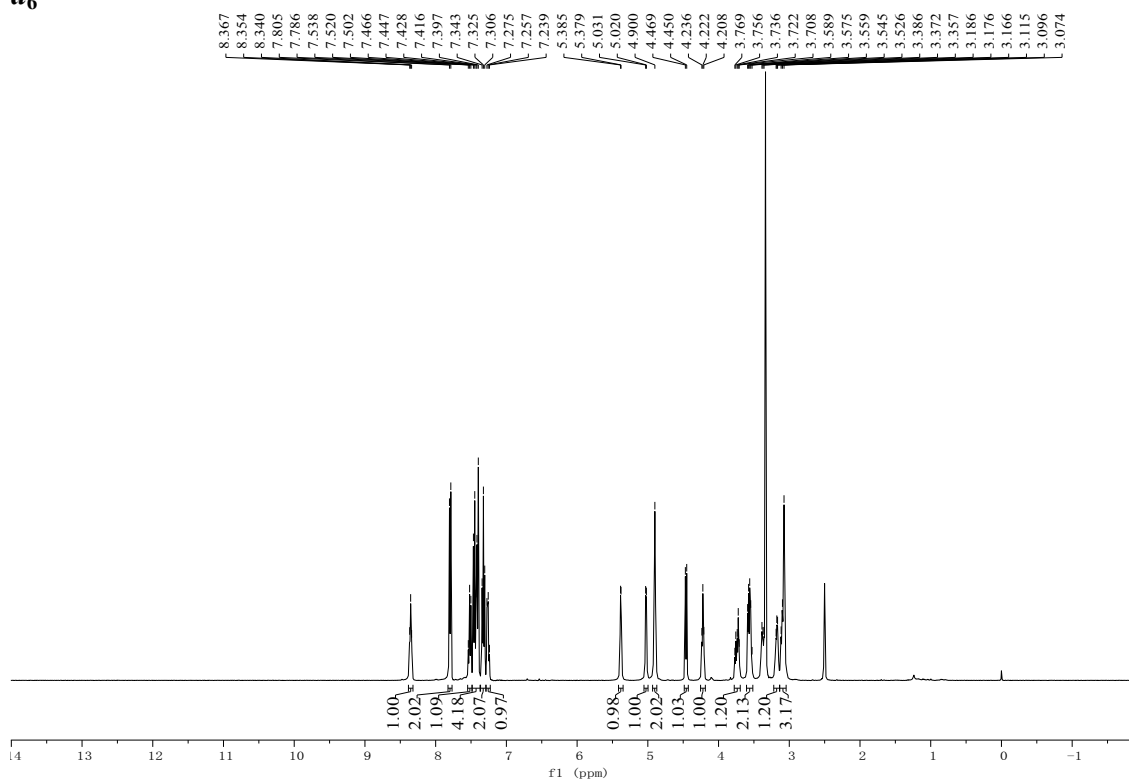

Figure S32. The  $^{13}\text{C}$  NMR (100 MHz) spectrum of Clausenaside C (3) in  $\text{DMSO-}d_6$

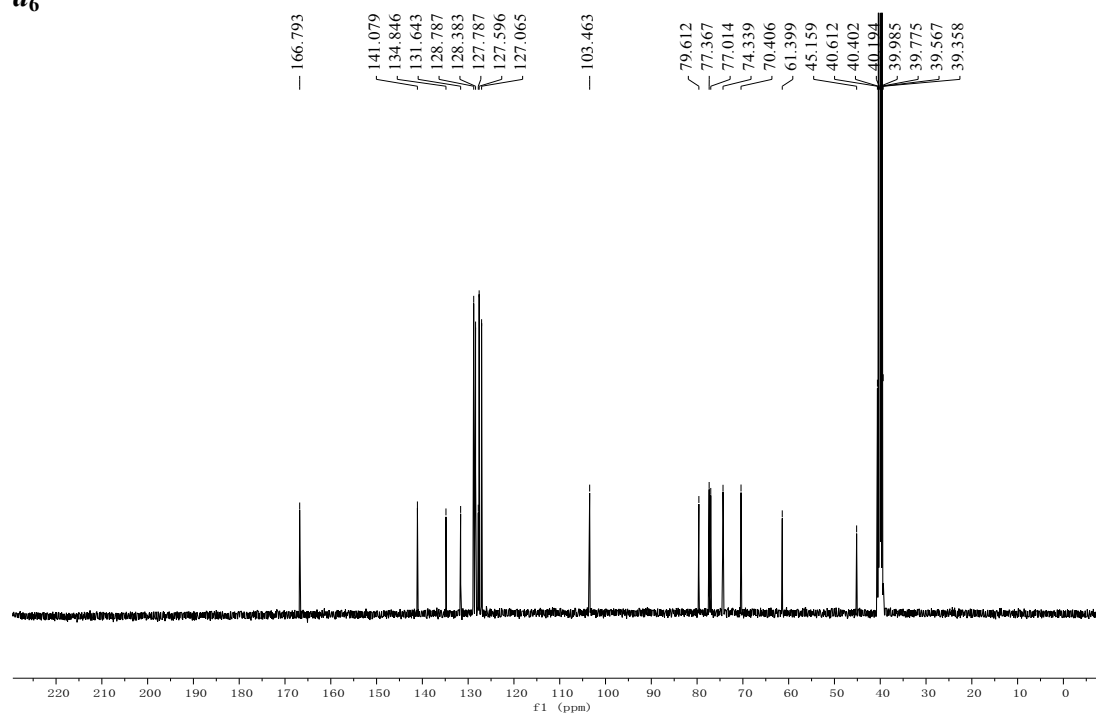

**Figure S33. The DEPT spectrum of Clausenaside C (3) in DMSO- $d_6$**

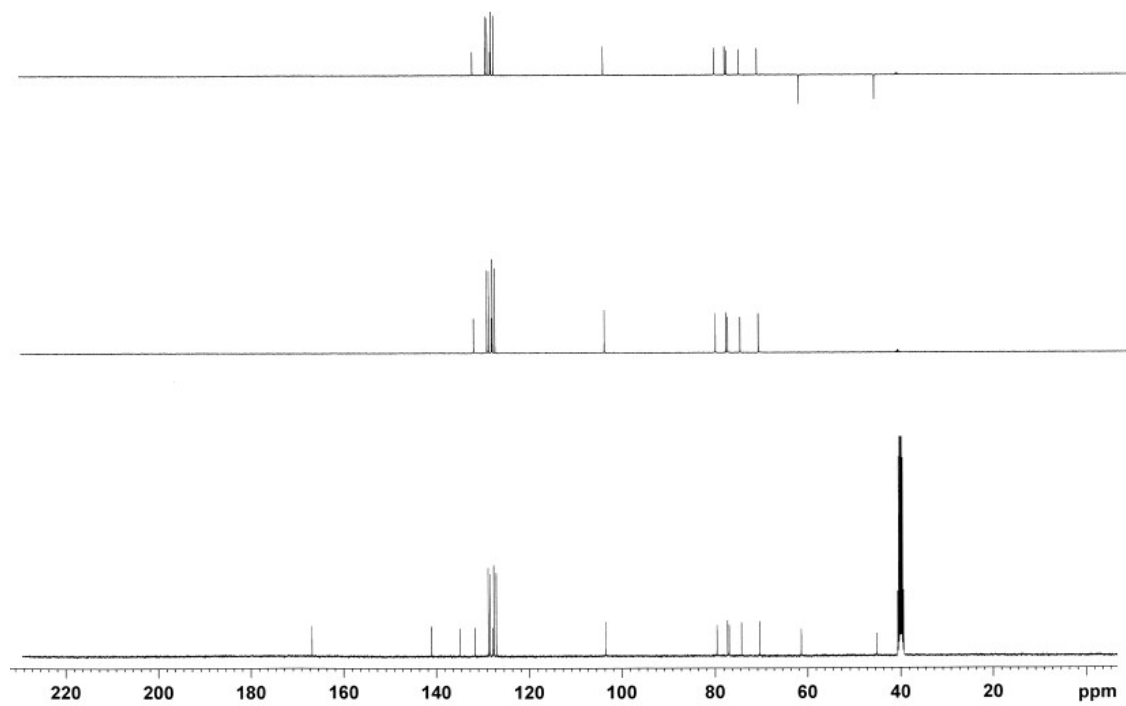

Figure S34. The HSQC spectrum of Clausenaside C (3) in DMSO-*d*<sub>6</sub>

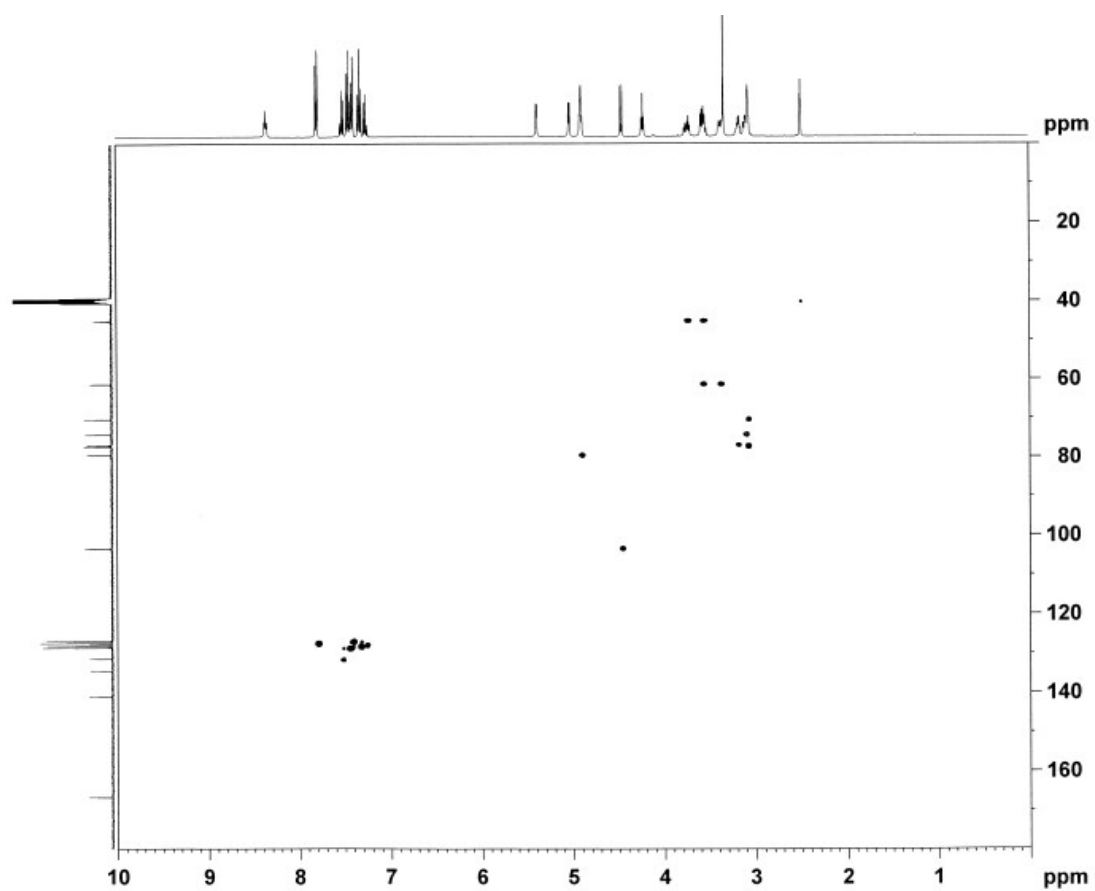

Figure S35. The HMBC spectrum of Clausenaside C (3) in DMSO- $d_6$

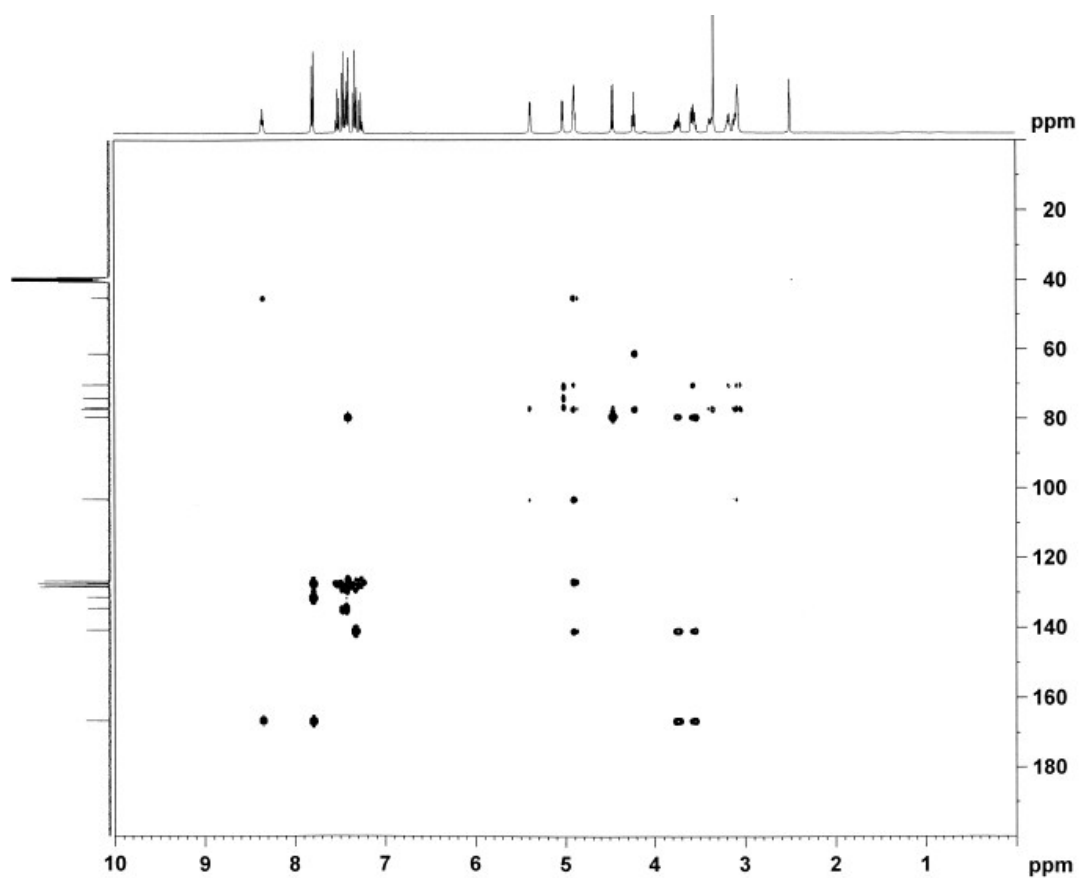

Figure S36. The  $^1\text{H}$ - $^1\text{H}$  COSY spectrum of Clausenaside C (3) in  $\text{DMSO-}d_6$

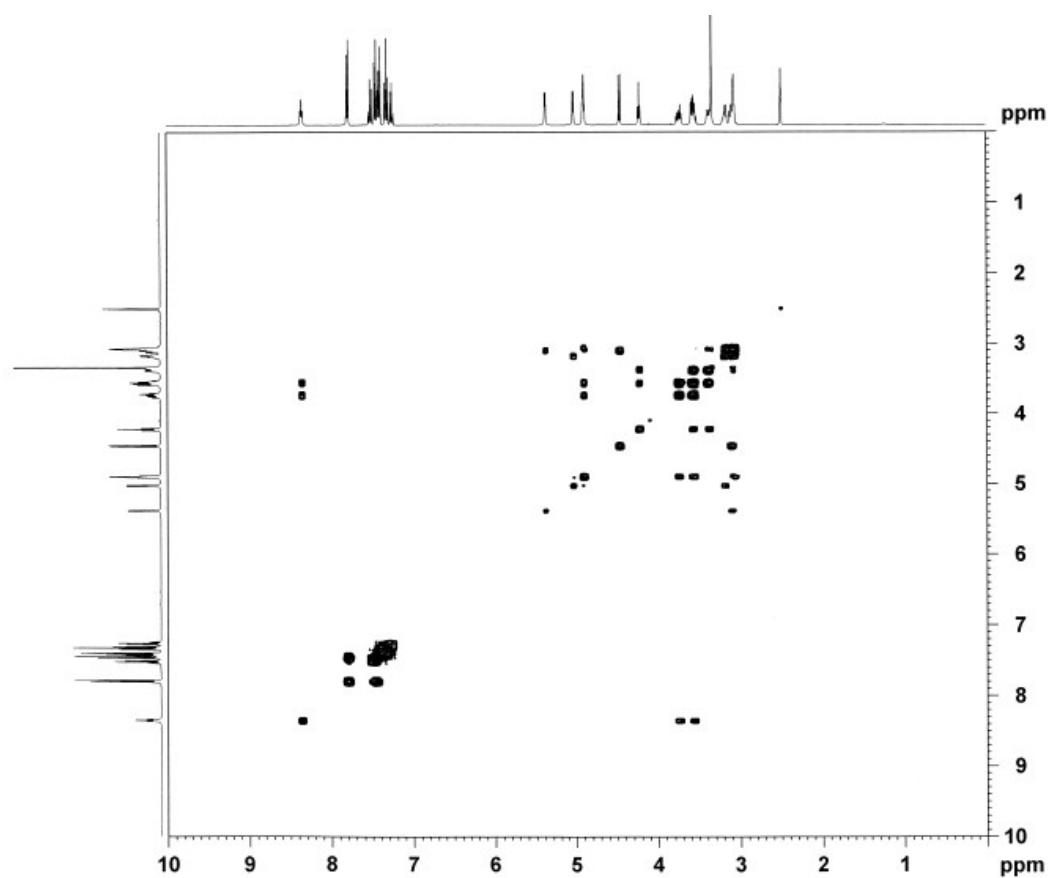

**Figure S37. The experimental CD spectrum of Clausenaside C (3)**

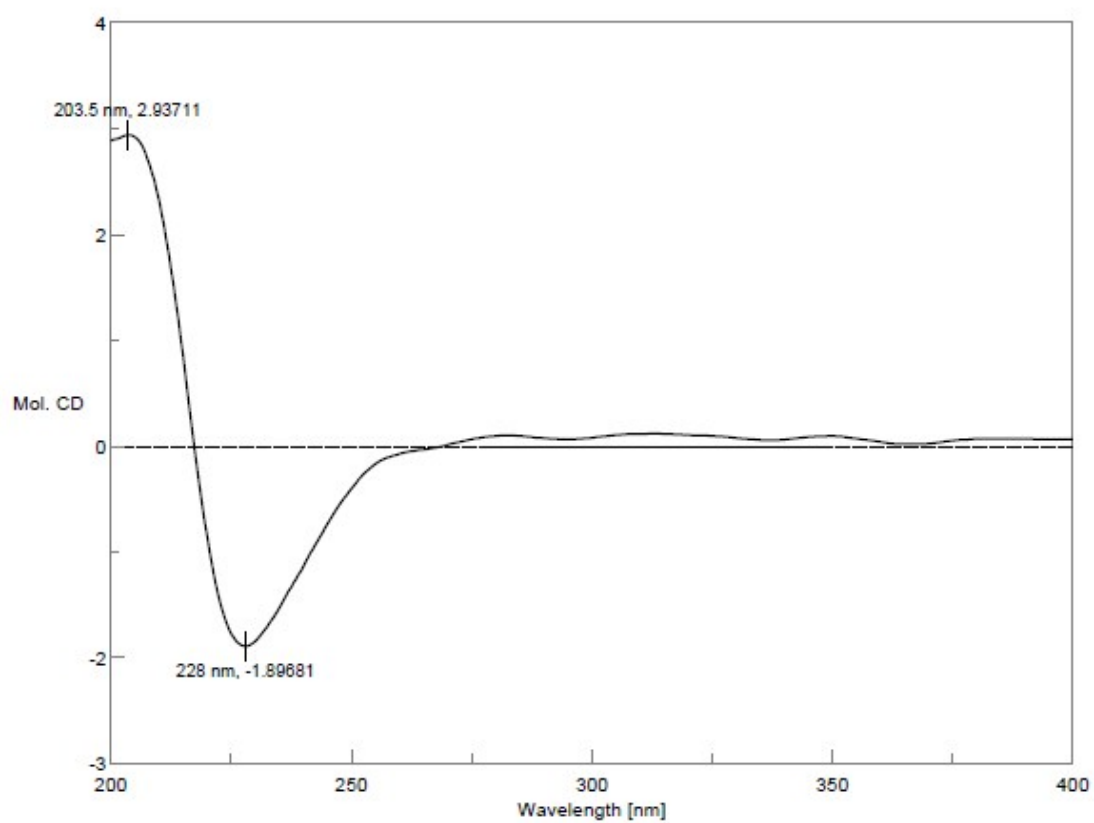



Figure S38. The IR spectrum of Clausenaside C (3)

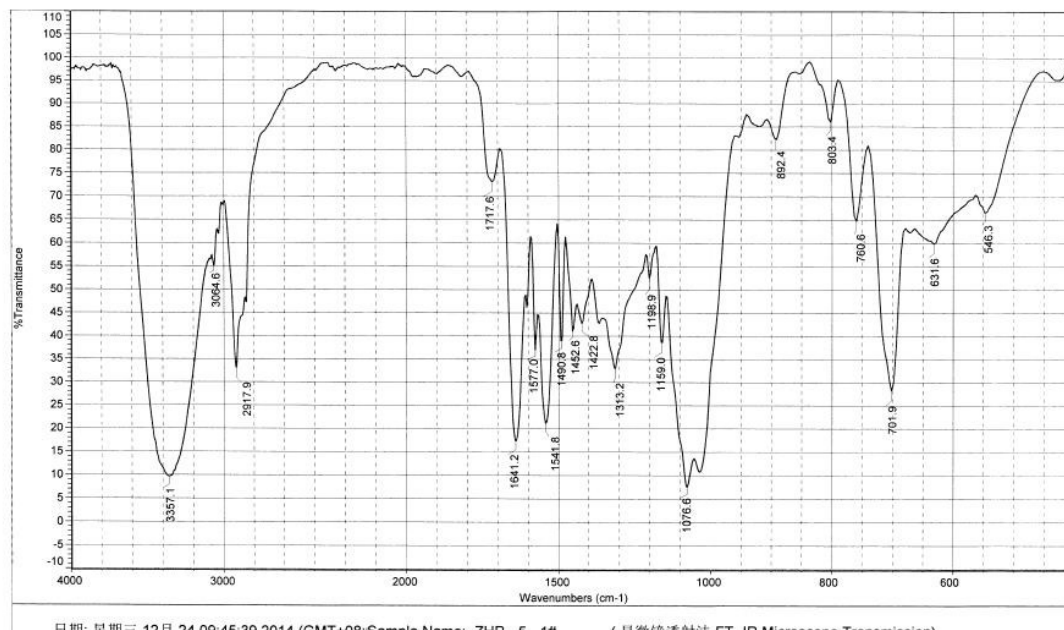

Figure S39. The HRESIMS of Clausenaside C (3)

MS Formula Results: + Scan (5.566 min) Sub (2014031201.d)

| m/z     | Ion                | Formula         | Abundance       |          |         |      |            |            |                |             |             |            |       |          |      |
|---------|--------------------|-----------------|-----------------|----------|---------|------|------------|------------|----------------|-------------|-------------|------------|-------|----------|------|
| 404.171 | (M+H) <sup>+</sup> | C21 H26 N O7    | 771528.8        |          |         |      |            |            |                |             |             |            |       |          |      |
| Best    | Formula (M)        | Ion Formula     | Calc. m/z       | Score    | Cross S | Mass | Calc. Mass | Diff (ppm) | Abs Diff (ppm) | Abund Match | Spacing Mat | Mass Match | m/z   | DBE      |      |
| +       | ☑                  | C21 H25 N O7    | C21 H26 N O7    | 404.1704 | 99.91   |      | 403.1637   | 403.1631   | -1.46          | 1.46        | 99.96       | 99.81      | 99.93 | 404.171  | 10   |
| +       | ☐                  | C22 H21 N5 O3   | C22 H22 N5 O3   | 404.1717 | 99.67   |      | 403.1637   | 403.1644   | 1.84           | 1.84        | 99.1        | 99.92      | 99.89 | 404.171  | 15   |
| +       | ☐                  | C19 H23 N4 O6   | C19 H24 N4 O6   | 404.169  | 99.59   |      | 403.1637   | 403.1618   | -4.8           | 4.8         | 99.91       | 99.91      | 99.24 | 404.171  | 10.5 |
| +       | ☐                  | C24 H23 N2 O4   | C24 H24 N2 O4   | 404.1731 | 99.12   |      | 403.1637   | 403.1658   | 5.18           | 5.18        | 98.51       | 99.83      | 99.12 | 404.171  | 14.5 |
| +       | ☐                  | C16 H27 N4 O6 S | C16 H28 N4 O6 S | 404.1724 | 98.79   |      | 403.1637   | 403.1651   | 3.55           | 3.55        | 96.75       | 99.62      | 99.69 | 404.171  | 5.5  |
| +       | ☐                  | C15 H31 O10 S   | C15 H32 O10 S   | 404.1711 | 98.69   |      | 403.1637   | 403.1638   | 0.25           | 0.25        | 93.69       | 99.55      | 100   | 404.171  | 0.5  |
| +       | ☐                  | C20 H27 N4 O S2 | C20 H28 N4 O S2 | 404.1699 | 97.88   |      | 403.1637   | 403.1626   | -2.66          | 2.66        | 92.73       | 99.43      | 99.77 | 404.171  | 9.5  |
| +       | ☐                  | C13 H29 N3 O9 S | C13 H30 N3 O9 S | 404.1681 | 97.62   |      | 403.1637   | 403.1625   | -3.1           | 3.1         | 92.52       | 99.6       | 99.68 | 404.171  | 11   |
| +       | ☐                  | C22 H29 N O2 S2 | C22 H30 N O2 S2 | 404.1712 | 97.59   |      | 403.1637   | 403.164    | 0.68           | 0.68        | 92.07       | 99.44      | 99.94 | 404.171  | 9    |
| Best    | Formula (M)        | Ion Formula     | Calc. m/z       | Score    | Cross S | Mass | Calc. Mass | Diff (ppm) | Abs Diff (ppm) | Abund Match | Spacing Mat | Mass Match | m/z   | DBE      |      |
| +       | ☑                  | C21 H25 N O7    | C21 H25 N O7    | 426.1523 | 99.94   |      | 403.1632   | 403.1631   | -0.18          | 0.18        | 99.83       | 99.97      | 100   | 426.1524 | 10   |
| +       | ☐                  | C22 H21 N5 O3   | C22 H21 N5 O3   | 426.1537 | 99.8    |      | 403.1632   | 403.1644   | 3.12           | 3.12        | 99.85       | 99.93      | 99.71 | 426.1524 | 10   |
| +       | ☐                  | C19 H23 N4 O6   | C19 H23 N4 O6   | 426.151  | 99.64   |      | 403.1632   | 403.1618   | -3.52          | 3.52        | 99.41       | 99.95      | 99.63 | 426.1524 | 10.5 |
| +       | ☐                  | C16 H27 N4 O6 S | C16 H27 N4 O6 S | 426.1544 | 98.15   |      | 403.1632   | 403.1651   | 4.83           | 4.83        | 94.97       | 99.67      | 99.3  | 426.1524 | 5.5  |
| +       | ☐                  | C20 H27 N4 O S2 | C20 H27 N4 O S2 | 426.1518 | 97.61   |      | 403.1632   | 403.1626   | -1.39          | 1.39        | 92.15       | 99.5       | 99.94 | 426.1524 | 9.5  |
| +       | ☐                  | C22 H29 N O2 S2 | C22 H29 N O2 S2 | 426.1532 | 97.5    |      | 403.1632   | 403.164    | 1.96           | 1.96        | 91.79       | 99.81      | 99.88 | 426.1524 | 9    |
| +       | ☐                  | C15 H31 O10 S   | C15 H31 N O10 S | 426.153  | 97.37   |      | 403.1632   | 403.1638   | 1.53           | 1.53        | 91.11       | 99.77      | 99.63 | 426.1524 | 0.5  |

Figure S40. The  $^1\text{H}$  NMR (600 MHz) spectrum of Clausenaside D (4) in  $\text{DMSO-}d_6$

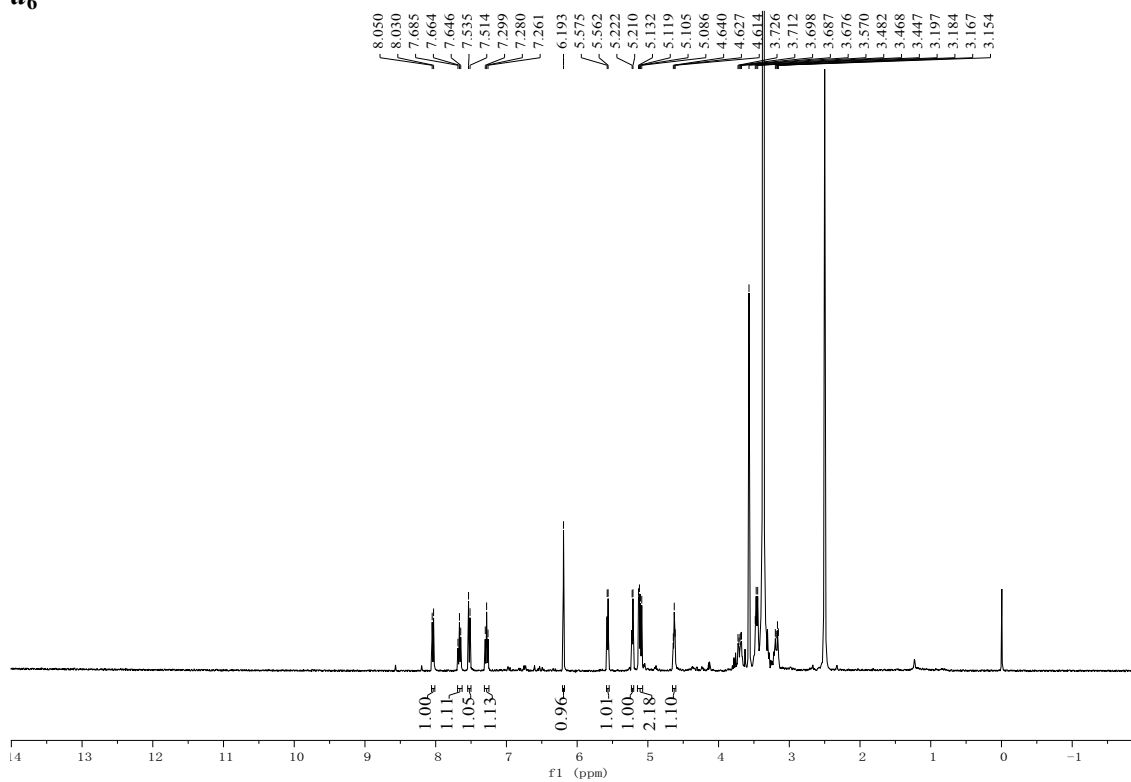



**Figure S42. The DEPT spectrum of Clausenaside D (4) in DMSO-*d*<sub>6</sub>**

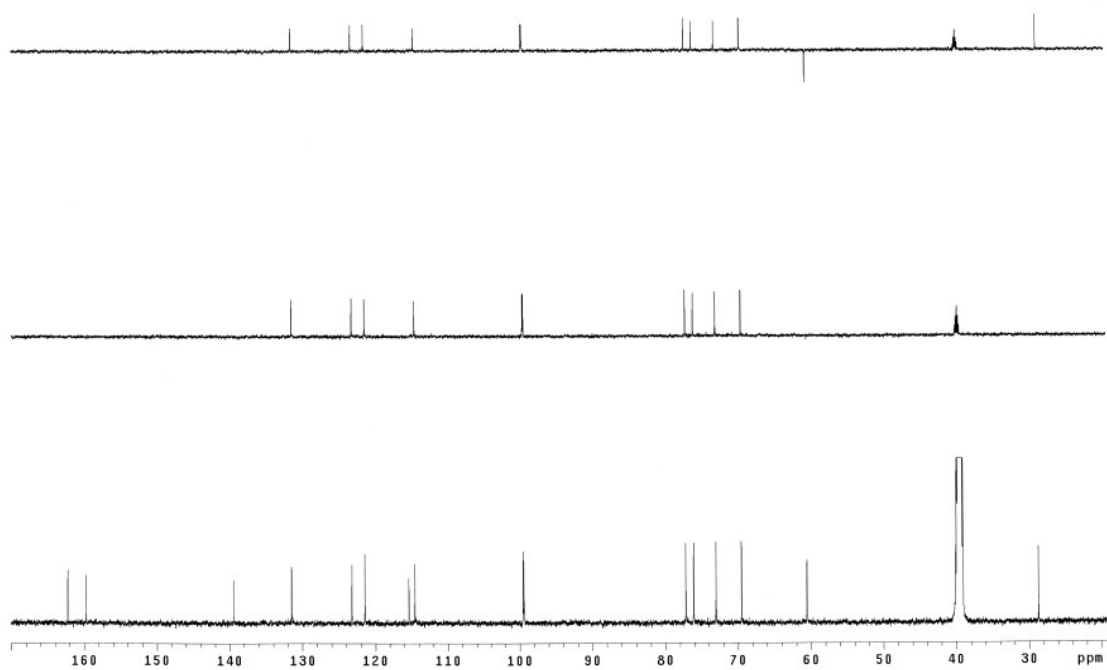

Figure S43. The HSQC spectrum of Clausenaside D (4) in DMSO-*d*<sub>6</sub>

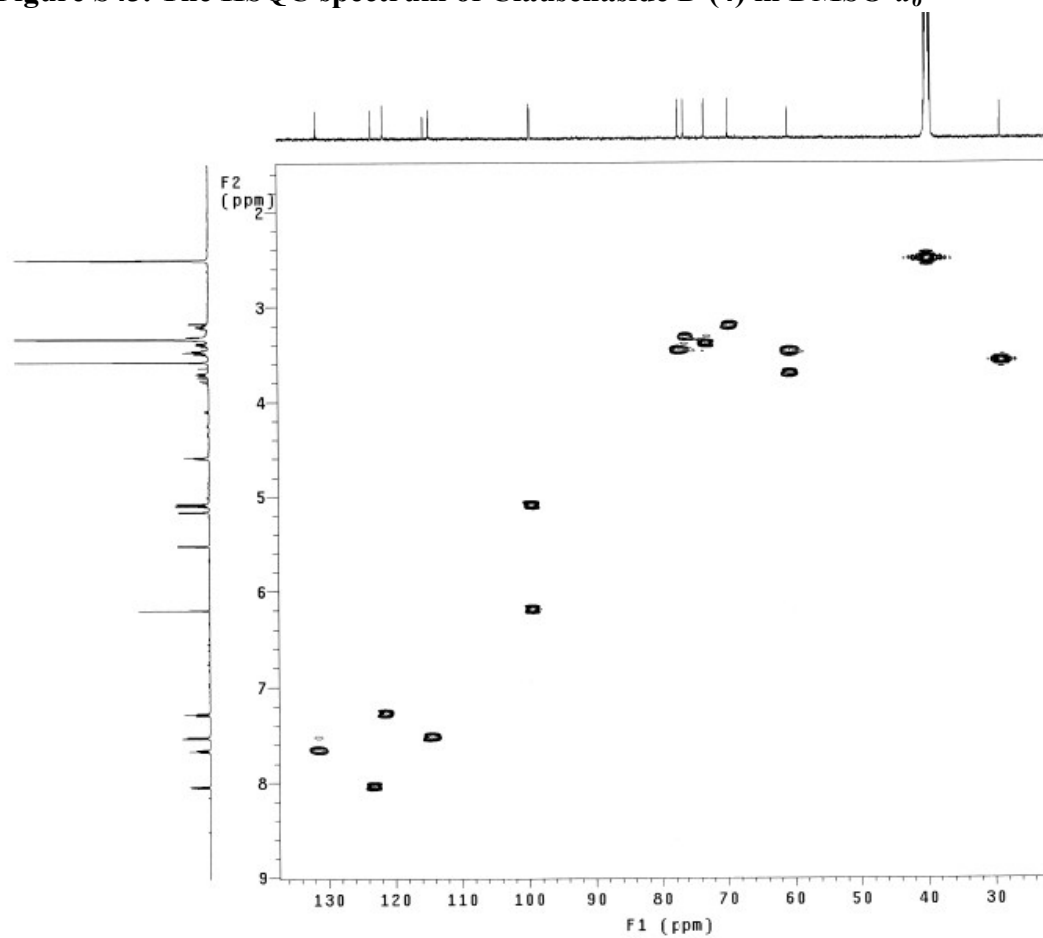

Figure S44. The HMBC spectrum of Clausenaside D (4) in DMSO-*d*<sub>6</sub>

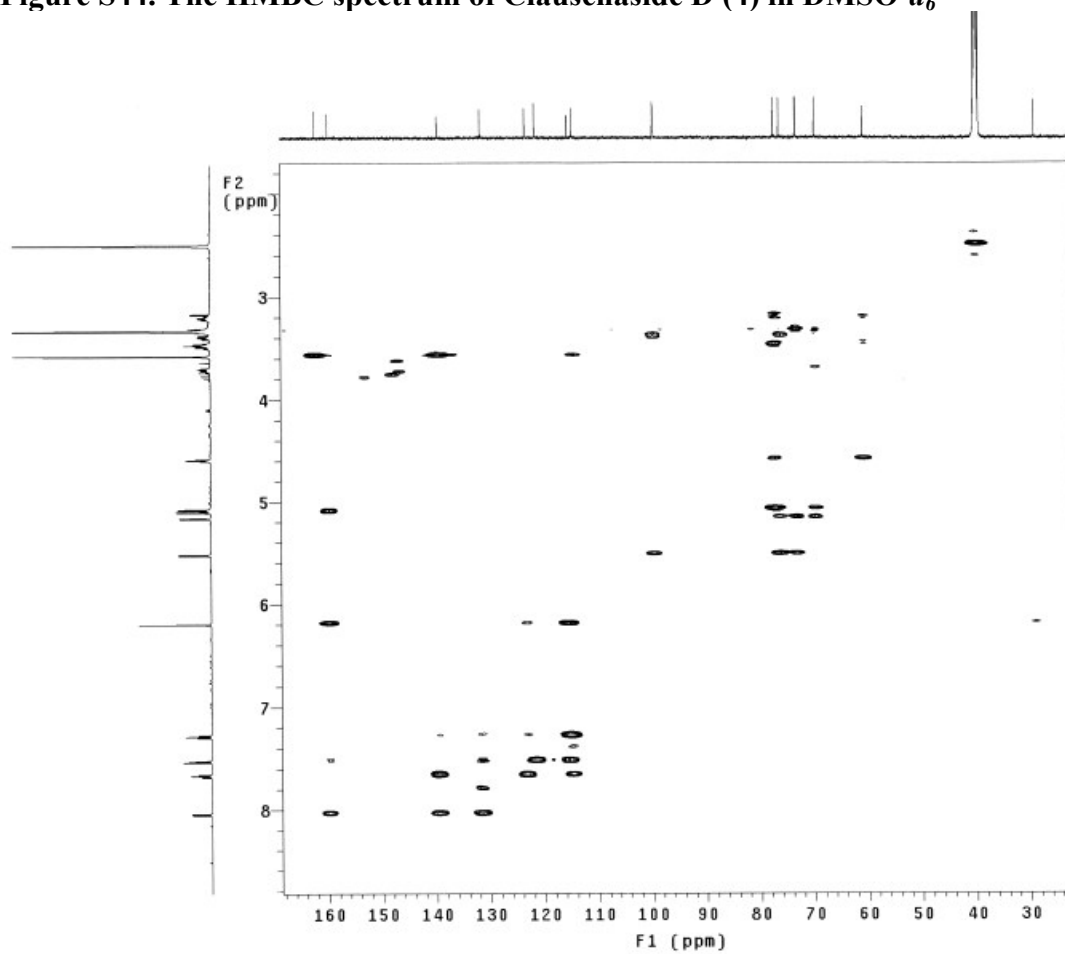

Figure S45. The  $^1\text{H}$ - $^1\text{H}$  COSY spectrum of Clausenaside D (4) in  $\text{DMSO-}d_6$

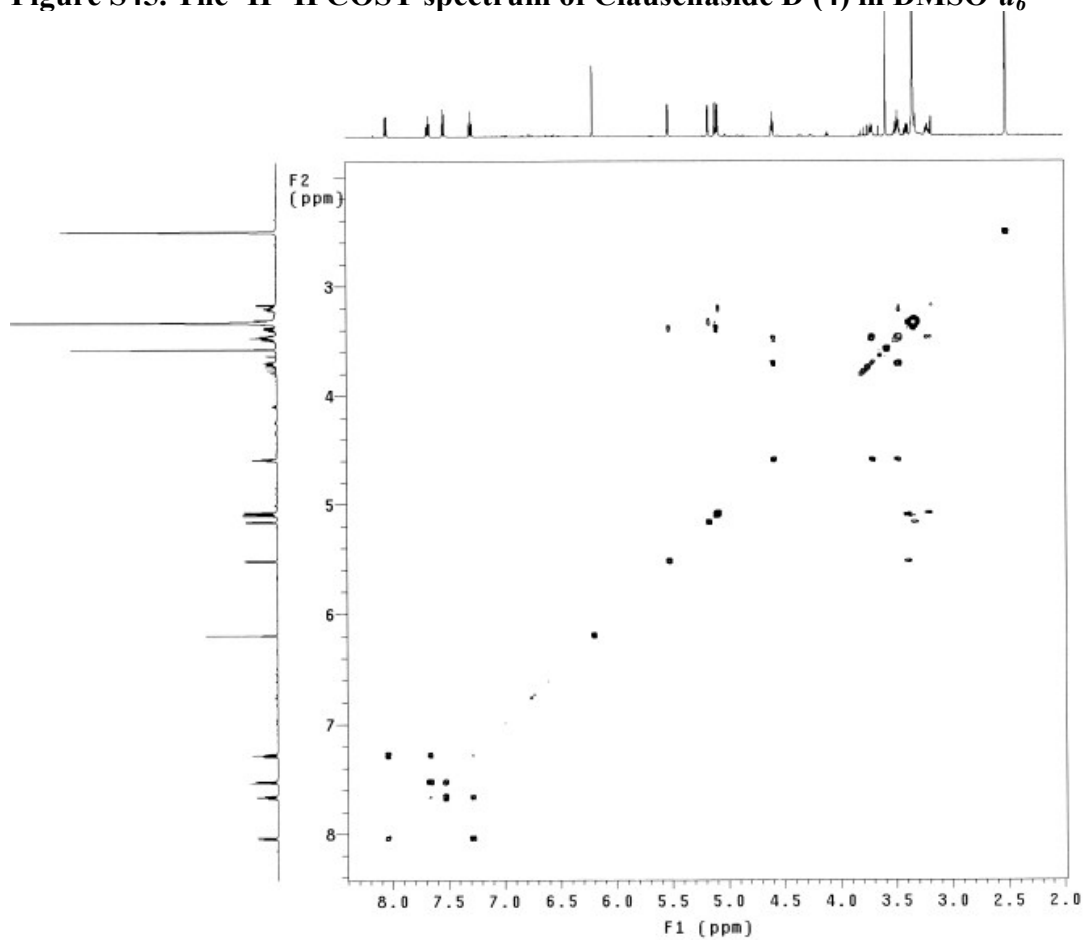



Figure S46. The IR spectrum of Clausenaside D (4)

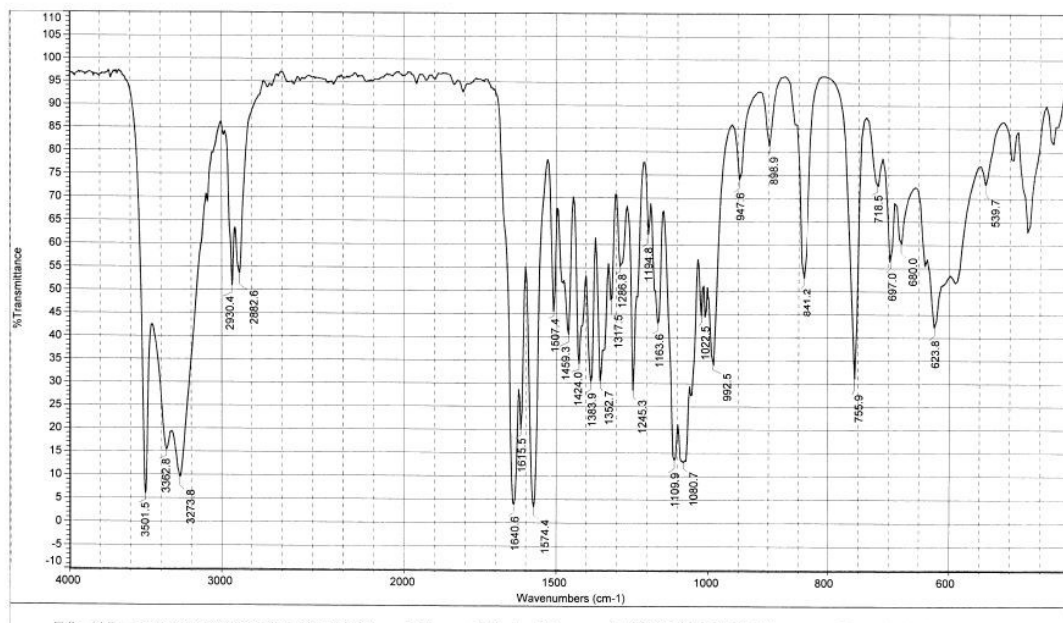

## Figure S47. The HRESIMS of Clausenaside D (4)

MS Formula Results: + Scan (4.227 min) Sub (2014051402.d)

| m/z      | Ion                                                           | Formula                                                       | Abundance |       |         |         |            |            |                 |              |             |            |          |     |
|----------|---------------------------------------------------------------|---------------------------------------------------------------|-----------|-------|---------|---------|------------|------------|-----------------|--------------|-------------|------------|----------|-----|
| 338.1232 | (M+H) <sup>+</sup>                                            | C <sub>16</sub> H <sub>20</sub> N <sub>2</sub> O <sub>7</sub> | 118451.9  |       |         |         |            |            |                 |              |             |            |          |     |
| Best     | Formula (M)                                                   | Ion Formula                                                   | Calc. m/z | Score | Cross S | Mass    | Calc. Mass | Diff (ppm) | Abs. Diff (ppm) | Abund. Match | Spacing Mat | Mass Match | m/z      | DBE |
| ✓        | C <sub>16</sub> H <sub>19</sub> N <sub>2</sub> O <sub>7</sub> | C <sub>16</sub> H <sub>20</sub> N <sub>2</sub> O <sub>7</sub> | 338.1234  | 99.96 |         | 337.116 | 337.1162   | 0.54       | 0.54            | 99.9         | 99.97       | 99.99      | 338.1232 | 8   |
|          | C <sub>17</sub> H <sub>16</sub> N <sub>2</sub> O <sub>3</sub> | C <sub>17</sub> H <sub>16</sub> N <sub>2</sub> O <sub>3</sub> | 338.1248  | 99.67 |         | 337.116 | 337.1175   | 4.5        | 4.5             | 99.67        | 99.86       | 99.36      | 338.1232 | 13  |

Figure S48. The  $^1\text{H}$  NMR (600 MHz) spectrum of Clausenaside E (5) in DMSO-

$d_6$

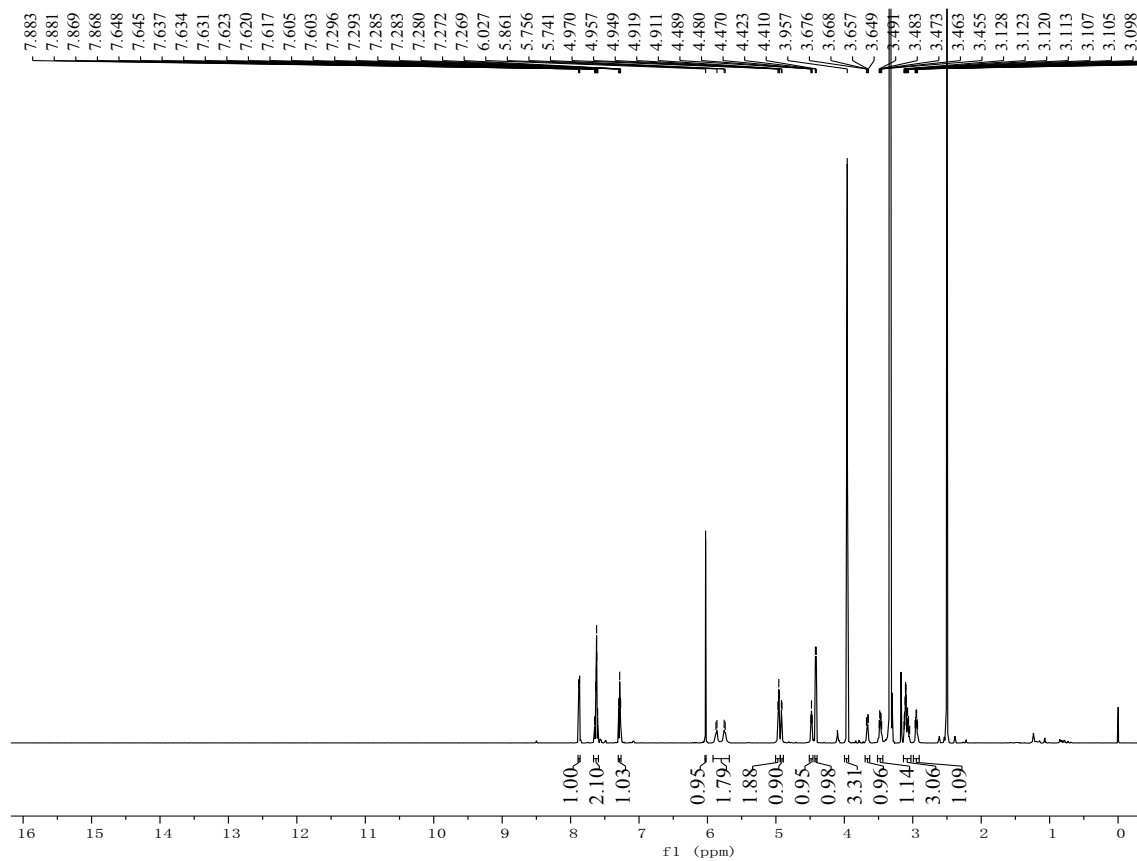

Figure S49. The  $^{13}\text{C}$  NMR (150 MHz) spectrum of Clausenaside E (5) in  $\text{DMSO-}d_6$

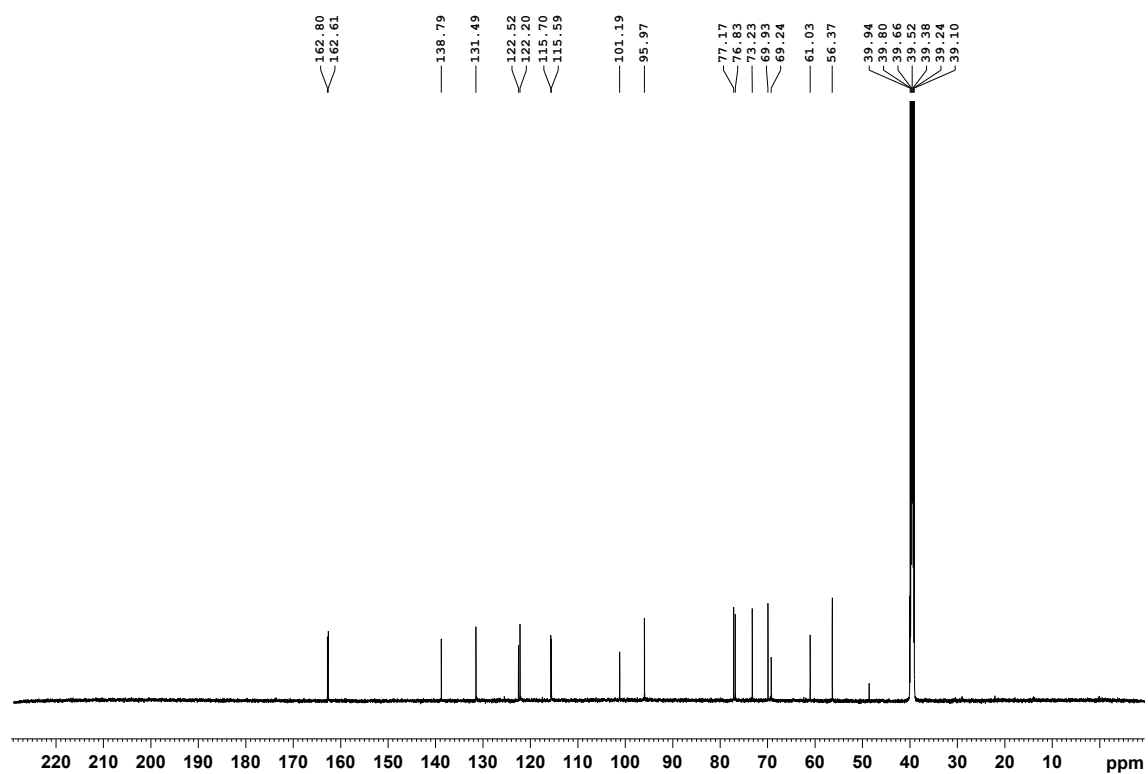

**Figure S50. The DEPT spectrum of Clausenaside E (5) in DMSO-*d*<sub>6</sub>**

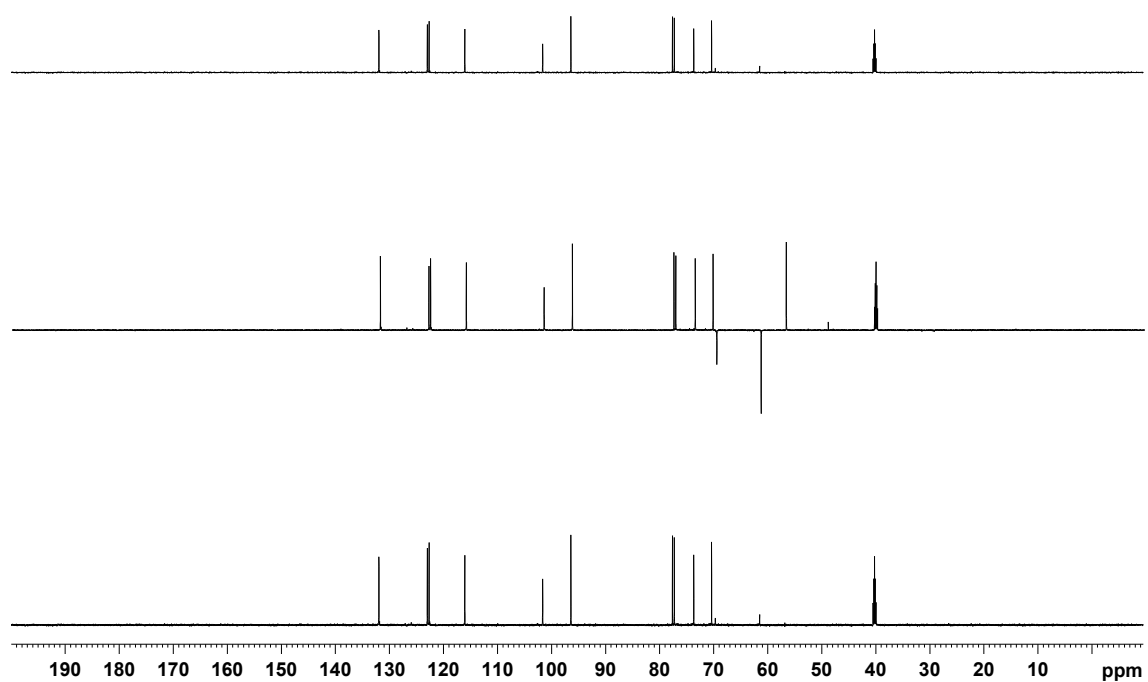

Figure S51. The HSQC spectrum of Clausenaside E (5) in DMSO- $d_6$

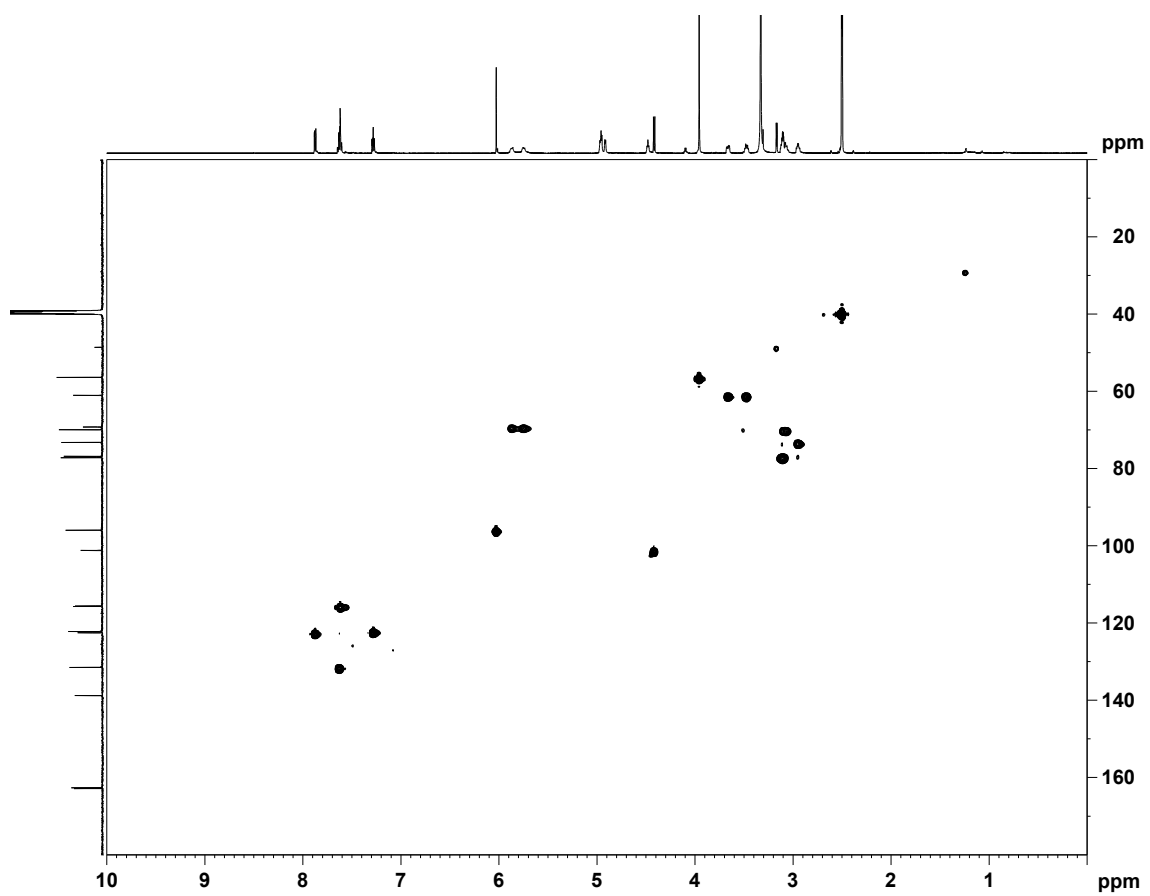

Figure S52. The HMBC spectrum of Clausenaside E (5) in DMSO- $d_6$

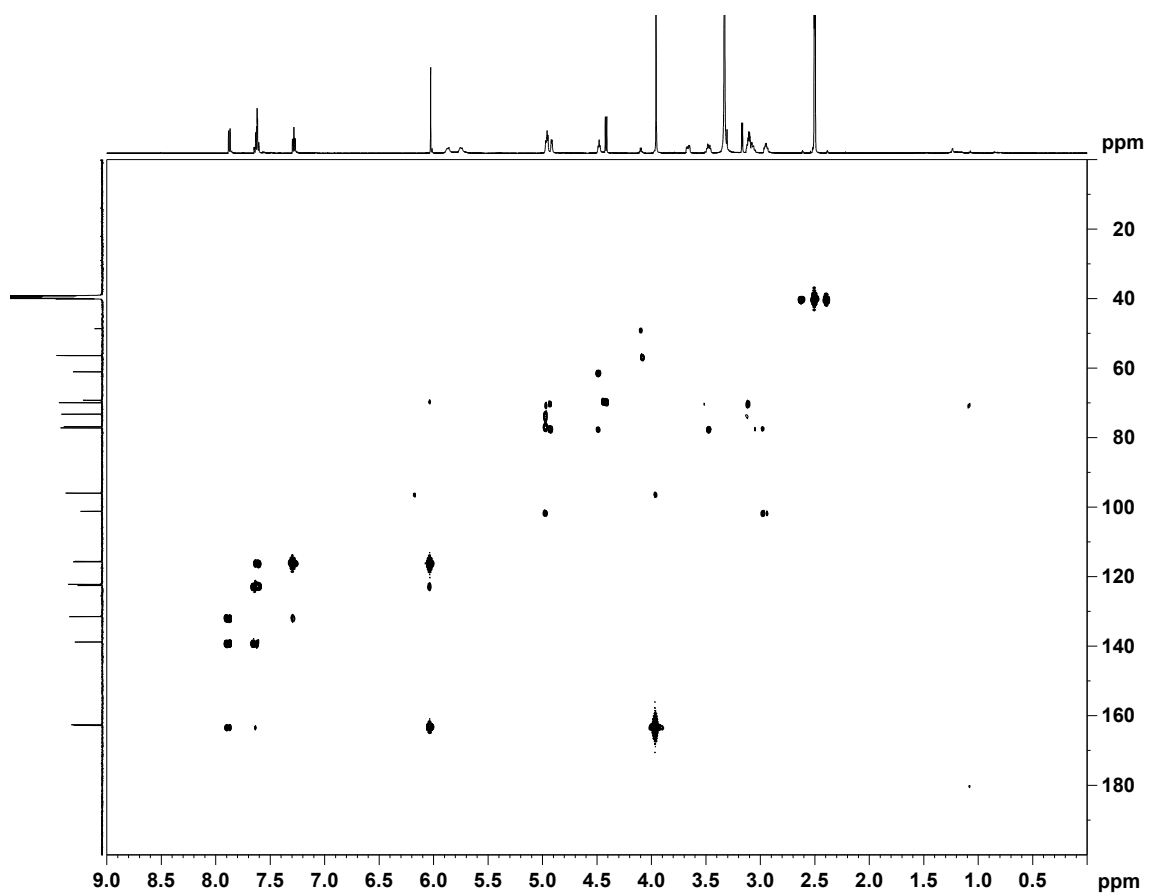

Figure S53. The  $^1\text{H}$ - $^1\text{H}$  COSY spectrum of Clausenaside E (5) in  $\text{DMSO-}d_6$

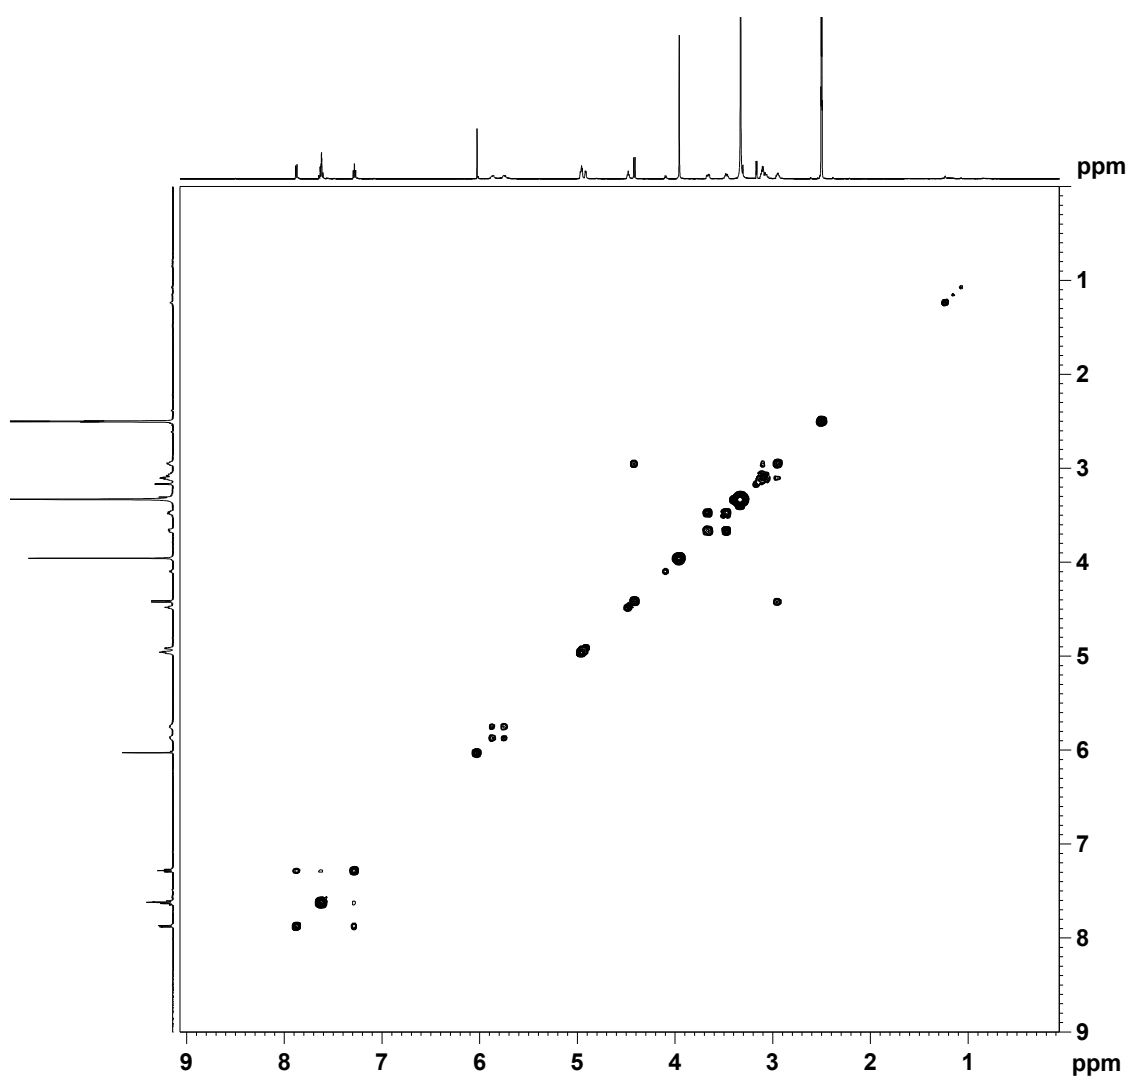



Figure S54. The IR spectrum of Clausenaside E (5)

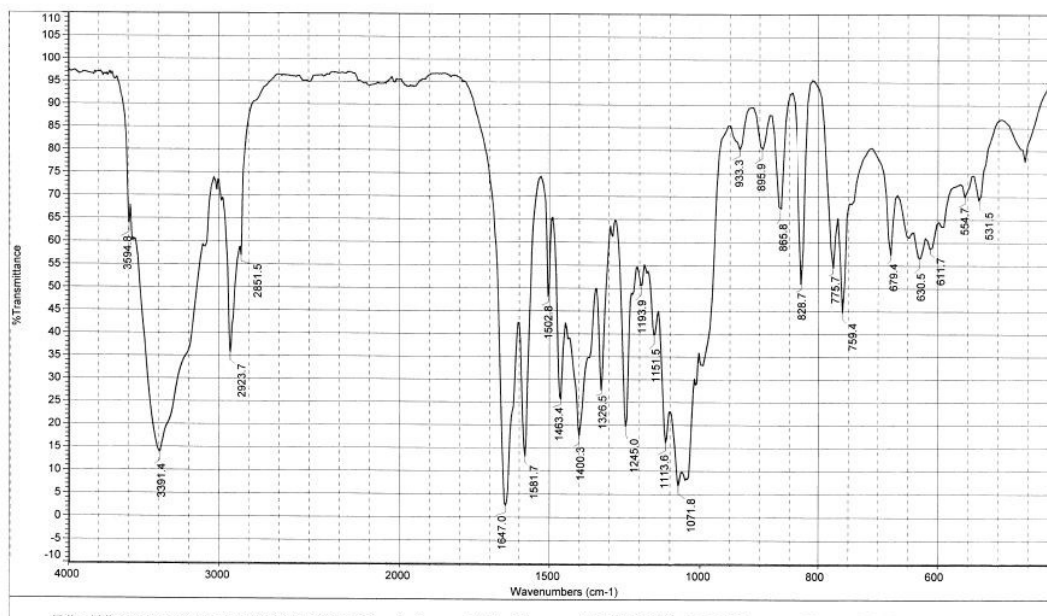

Figure S55. The HRESIMS of Clausenaside E (5)

MS Formula Results: + Scan (5.158 min) Sub (2014090101.d)

| m/z      | Ion                  | Formula                 | Abundance |             |          |            |            |             |               |     |
|----------|----------------------|-------------------------|-----------|-------------|----------|------------|------------|-------------|---------------|-----|
| 368.1346 | (M+H) <sup>+</sup>   | C17 H22 N O8            | 889722.2  |             |          |            |            |             |               |     |
| Best     | Formula (M)          | Ion Formula             | Score     | Cross Score | Calc m/z | Diff (ppm) | Mass Match | Abund Match | Spacing Match | DBE |
| ✓        | C17 H21 N O8         | C17 H22 N O8            | 99.9      |             | 368.134  | -1.68      | 99.91      | 99.84       | 99.95         | 8   |
|          | C14 H22 F N O9       | C14 H23 F N O9          | 99.34     |             | 368.1351 | 1.43       | 99.93      | 97.86       | 99.95         | 4   |
|          | C16 H23 F N3 O2 P Si | C16 H24 F N3 O2 P Si    | 99.31     |             | 368.1354 | 2.11       | 99.86      | 98.08       | 99.7          | 8   |
|          | C19 H22 N3 O P Si    | C19 H23 N3 O P Si       | 98.6      |             | 368.1343 | -1         | 99.97      | 95.34       | 99.77         | 12  |
| m/z      | Ion                  | Formula                 | Abundance |             |          |            |            |             |               |     |
| 390.1161 | (M+Na) <sup>+</sup>  | C17 H21 N Na O8         | 471258.3  |             |          |            |            |             |               |     |
| Best     | Formula (M)          | Ion Formula             | Score     | Cross Score | Calc m/z | Diff (ppm) | Mass Match | Abund Match | Spacing Match | DBE |
| ✓        | C17 H21 N O8         | C17 H21 N Na O8         | 99.96     |             | 390.1159 | -0.36      | 100        | 99.87       | 99.99         | 8   |
|          | C14 H22 F N O9       | C14 H22 F N Na O9       | 99.69     |             | 390.1171 | 2.75       | 99.78      | 99.28       | 100           | 4   |
|          | C20 H19 F N3 O P     | C20 H19 F N3 Na O P     | 98.88     |             | 390.1142 | -5.1       | 99.24      | 97.35       | 99.99         | 13  |
|          | C16 H23 F N3 O2 P Si | C16 H23 F N3 Na O2 P Si | 98.81     |             | 390.1173 | 3.44       | 99.66      | 96.69       | 99.68         | 8   |
|          | C17 H22 F N O5 Si    | C17 H22 F N Na O5 Si    | 98.47     |             | 390.1143 | -4.7       | 99.36      | 95.9        | 99.78         | 8   |
|          | C19 H22 N3 O P Si    | C19 H22 N3 Na O P Si    | 97.91     |             | 390.1162 | 0.33       | 100        | 92.89       | 99.75         | 12  |

Figure S56. The  $^1\text{H}$  NMR (600 MHz) spectrum of Clausenaside F (6) in  $\text{MeOH-}d_4$

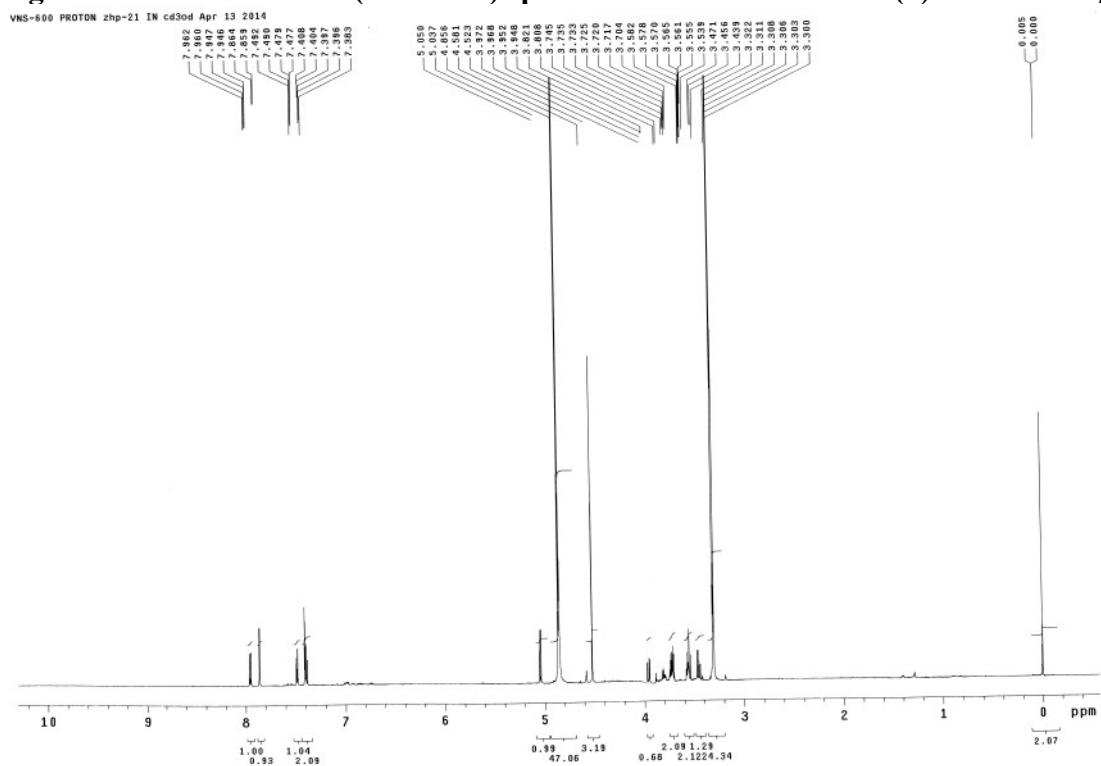

Figure S57. The  $^{13}\text{C}$  NMR (150 MHz) spectrum of Clausenaside F (6) in  $\text{MeOH-}d_4$

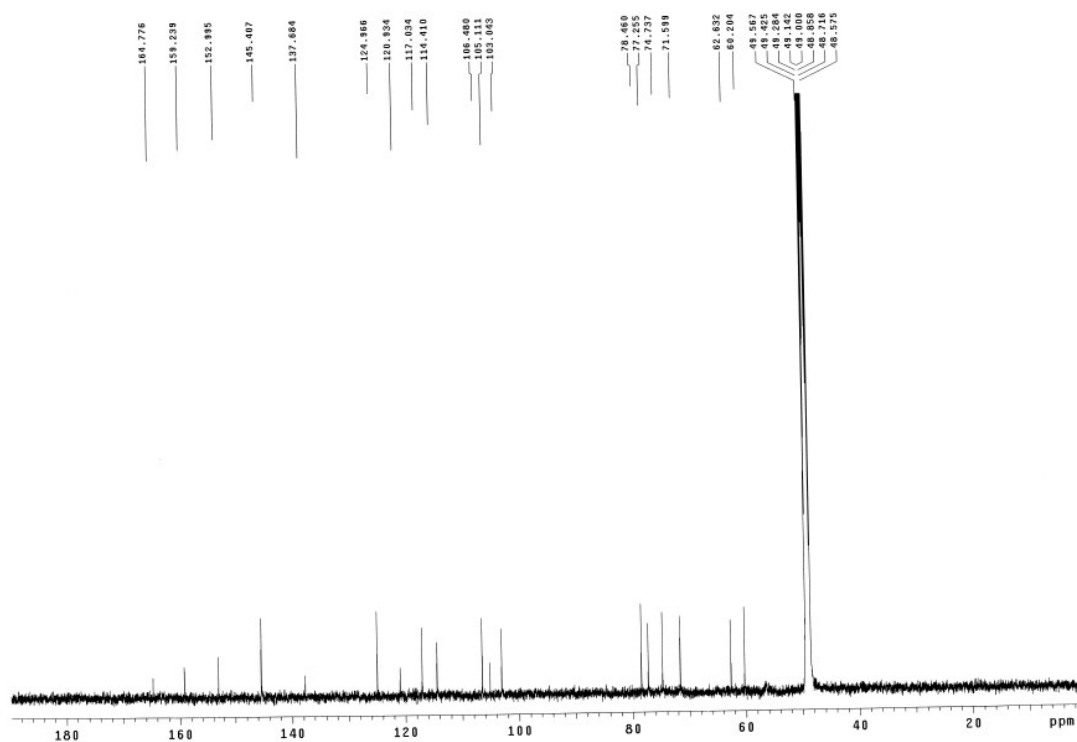

Figure S58. The HSQC spectrum of Clausenaside F (6) in MeOH- $d_4$

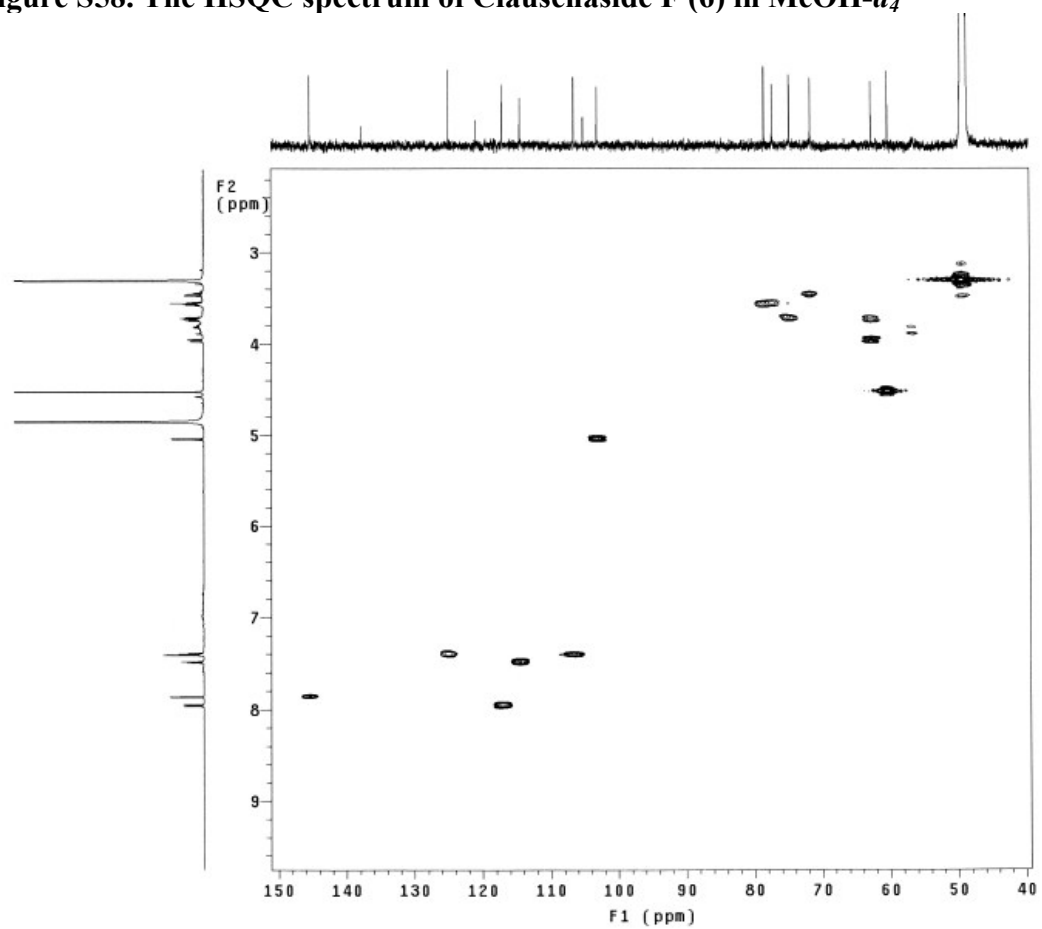

Figure S59. The HMBC spectrum of Clausenaside F (6) in MeOH- $d_4$

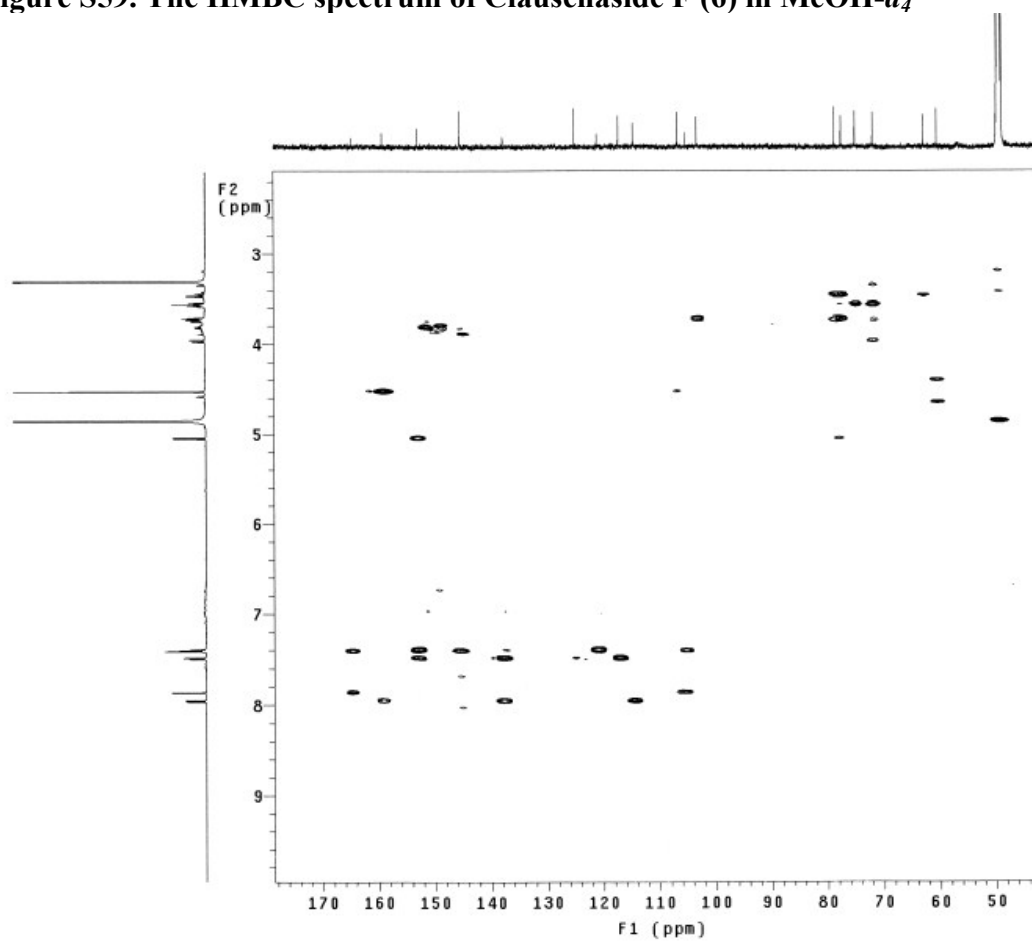

Figure S60. The  $^1\text{H}$ - $^1\text{H}$  COSY spectrum of Clausenaside F (6) in  $\text{MeOH-}d_4$

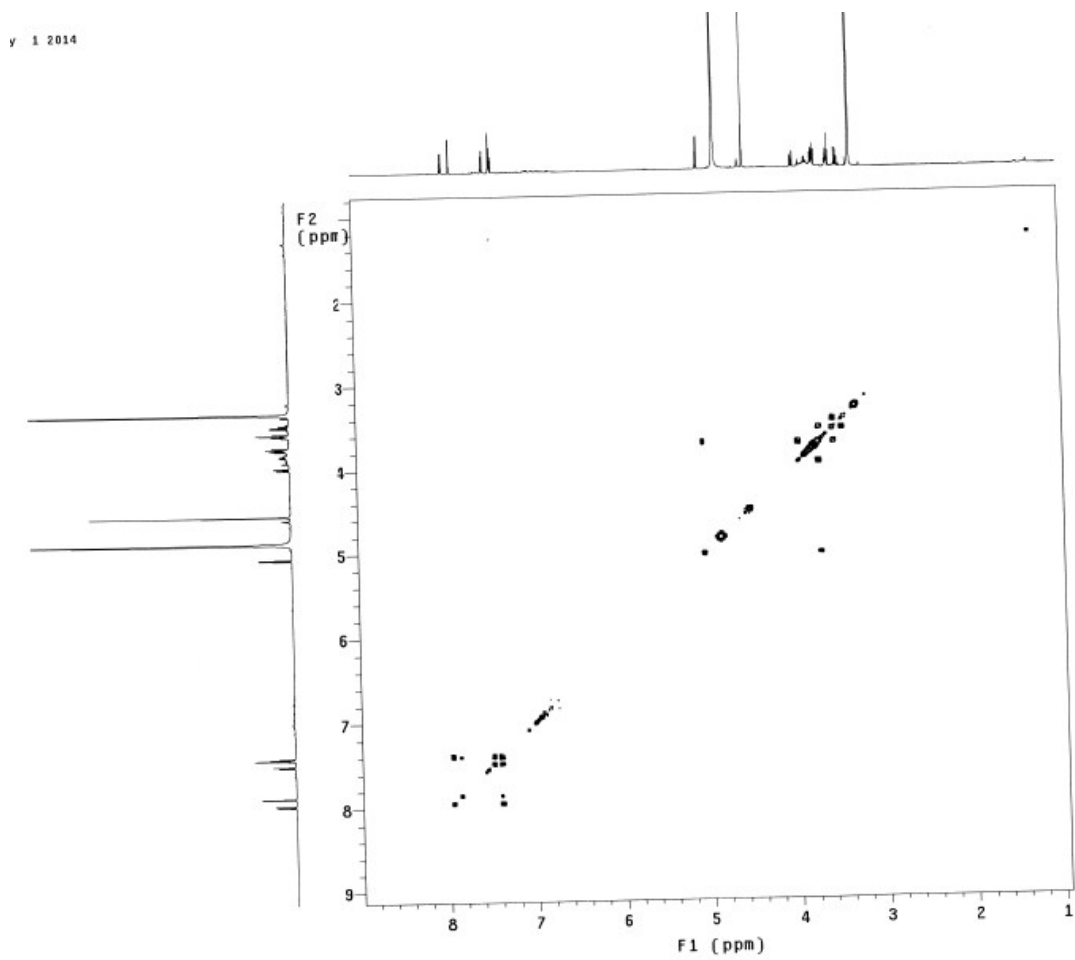

Figure S61. The IR spectrum of Clausenaside F (6)

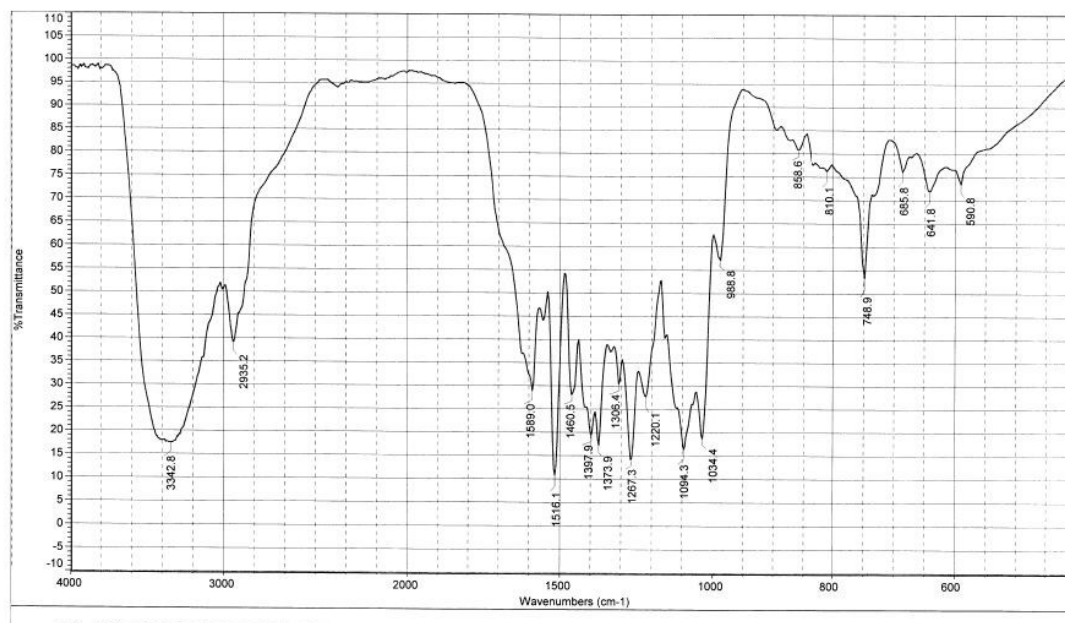



**Figure S62. The HRESIMS of Clausenaside F (6)**

MS Formula Results: + Scan (5.404 min) Sub (2014031202.d)

| m/z     | Ion                | Formula      | Abundance |
|---------|--------------------|--------------|-----------|
| 378.118 | (M+H) <sup>+</sup> | C18 H20 N O8 | 398447.1  |

  

| Best | Formula (M)      | Ion Formula      | Calc m/z | Score | Cross S | Mass     | Calc Mass | Diff (ppm) | Abs Diff (ppm) | Abund Match | Spacing Mat | Mass Match | m/z     | DRE  |
|------|------------------|------------------|----------|-------|---------|----------|-----------|------------|----------------|-------------|-------------|------------|---------|------|
| ✓    | C18 H19 N O8     | C18 H20 N O8     | 378.1183 | 99.97 |         | 377.1107 | 377.1111  | 0.85       | 0.85           | 99.93       | 100         | 99.98      | 378.118 | 10   |
| ✓    | C18 H17 N4 O7    | C18 H18 N4 O7    | 378.117  | 99.77 |         | 377.1107 | 377.1097  | -2.72      | 2.72           | 99.82       | 99.98       | 99.76      | 378.118 | 10.5 |
| ✓    | C19 H15 N5 O4    | C19 H16 N5 O4    | 378.1197 | 99.61 |         | 377.1107 | 377.1124  | 4.39       | 4.39           | 99.68       | 99.98       | 99.38      | 378.118 | 15   |
| ✓    | C22 H19 N O3 S   | C22 H20 N O3 S   | 378.1158 | 98.42 |         | 377.1107 | 377.1088  | -5.79      | 5.79           | 96.51       | 99.73       | 98.62      | 378.118 | 14   |
| ✓    | C25 H17 N2 S     | C25 H18 N2 S     | 378.1185 | 98.13 |         | 377.1107 | 377.1112  | 1.32       | 1.32           | 99.76       | 99.76       | 99.94      | 378.118 | 16.5 |
| ✓    | C17 H21 N4 O2 S2 | C17 H22 N4 O2 S2 | 378.1179 | 97.86 |         | 377.1108 | 377.1106  | -0.42      | 0.42           | 97.86       | 99.36       | 99.99      | 378.118 | 9.5  |
| ✓    | C12 H25 O11 S    | C12 H26 O11 S    | 378.119  | 97.21 |         | 377.1107 | 377.1118  | 2.68       | 2.68           | 96.91       | 99.64       | 99.77      | 378.118 | 8.5  |
| ✓    | C19 H23 N O3 S2  | C19 H24 N O3 S2  | 378.1192 | 97.2  |         | 377.1107 | 377.1119  | 3.15       | 3.15           | 91.19       | 99.46       | 99.68      | 378.118 | 9    |

  

| m/z      | Ion                 | Formula         | Abundance |
|----------|---------------------|-----------------|-----------|
| 400.0999 | (M+Na) <sup>+</sup> | C18 H19 N Na O8 | 244096.6  |

  

| Best | Formula (M)      | Ion Formula         | Calc m/z | Score | Cross S | Mass     | Calc Mass | Diff (ppm) | Abs Diff (ppm) | Abund Match | Spacing Mat | Mass Match | m/z      | DRE  |
|------|------------------|---------------------|----------|-------|---------|----------|-----------|------------|----------------|-------------|-------------|------------|----------|------|
| ✓    | C18 H19 N O8     | C18 H19 N Na O8     | 400.1003 | 99.95 |         | 377.1107 | 377.1111  | 0.96       | 0.96           | 99.92       | 99.95       | 99.97      | 400.0999 | 10   |
| ✓    | C18 H17 N4 O7    | C18 H17 N4 Na O7    | 400.0989 | 99.8  |         | 377.1107 | 377.1097  | -2.61      | 2.61           | 99.62       | 100         | 99.8       | 400.0999 | 10.5 |
| ✓    | C19 H15 N5 O4    | C19 H15 N5 Na O4    | 400.1016 | 99.52 |         | 377.1107 | 377.1124  | 4.5        | 4.5            | 99.32       | 100         | 99.41      | 400.0999 | 15   |
| ✓    | C22 H19 N O3 S   | C22 H19 N Na O3 S   | 400.0978 | 98.63 |         | 377.1107 | 377.1088  | -5.68      | 5.68           | 97.07       | 99.66       | 99.06      | 400.0999 | 14   |
| ✓    | C25 H17 N2 S     | C25 H17 N2 Na S     | 400.1005 | 98.2  |         | 377.1107 | 377.1112  | 1.43       | 1.43           | 94.03       | 99.71       | 99.84      | 400.0999 | 18.5 |
| ✓    | C17 H21 N4 O2 S2 | C17 H21 N4 Na O2 S2 | 400.0998 | 97.91 |         | 377.1107 | 377.1106  | -0.31      | 0.31           | 93.27       | 99.29       | 100        | 400.0999 | 9.5  |
| ✓    | C19 H23 N O3 S2  | C19 H23 N Na O3 S2  | 400.1012 | 97.63 |         | 377.1107 | 377.1119  | 3.26       | 3.26           | 92.77       | 99.36       | 99.69      | 400.0999 | 9    |
| ✓    | C12 H25 O11 S    | C12 H25 Na O11 S    | 400.101  | 97.62 |         | 377.1107 | 377.1118  | 2.79       | 2.79           | 92.44       | 99.53       | 99.77      | 400.0999 | 8.5  |
| ✓    | C16 H23 N3 O10 S | C16 H23 N3 Na O10 S | 400.0996 | 97.27 |         | 377.1107 | 377.1104  | -0.78      | 0.78           | 90.87       | 99.53       | 99.86      | 400.0999 | 1    |
| ✓    | C18 H25 O8 S2    | C18 H25 Na O8 S2    | 400.0985 | 97.18 |         | 377.1107 | 377.1093  | -3.85      | 3.85           | 91.41       | 99.33       | 99.57      | 400.0999 | 4.5  |

Figure S63. The  $^1\text{H}$  NMR (600 MHz) spectrum of Clausenaside G (7) in  $\text{DMSO-}d_6$

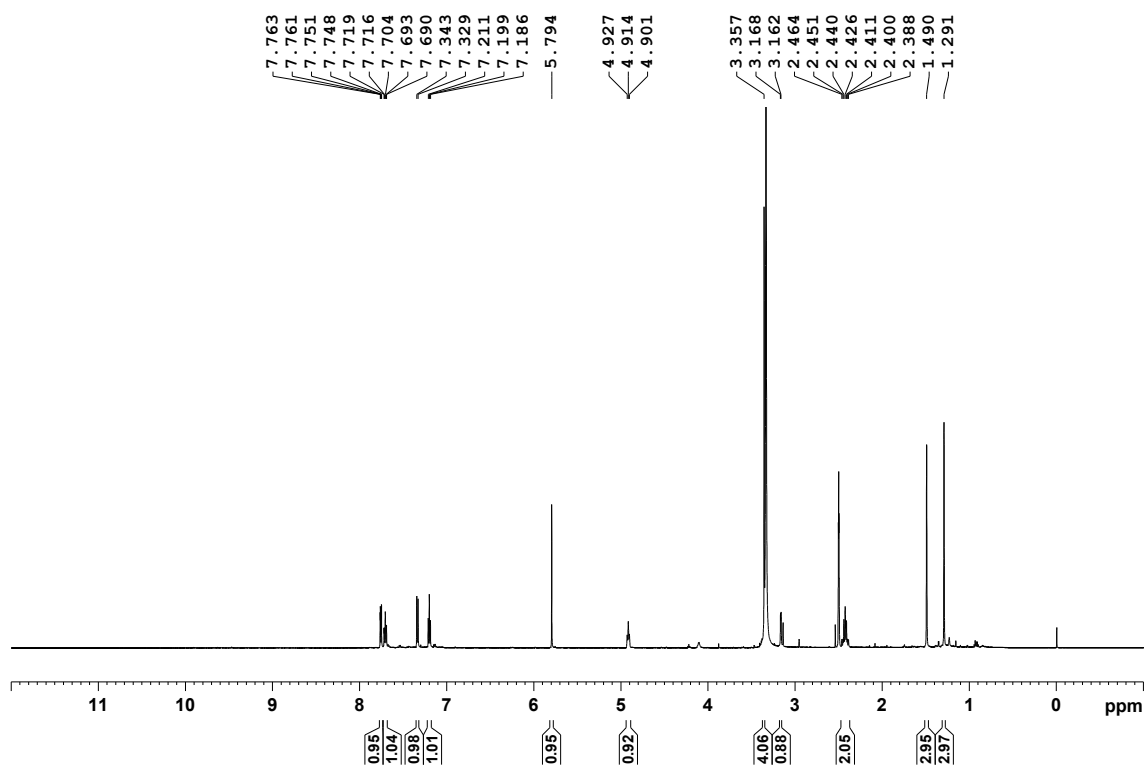

Figure S64. The  $^{13}\text{C}$  NMR (150 MHz) spectrum of Clausenaside G (7) in  $\text{DMSO-}d_6$

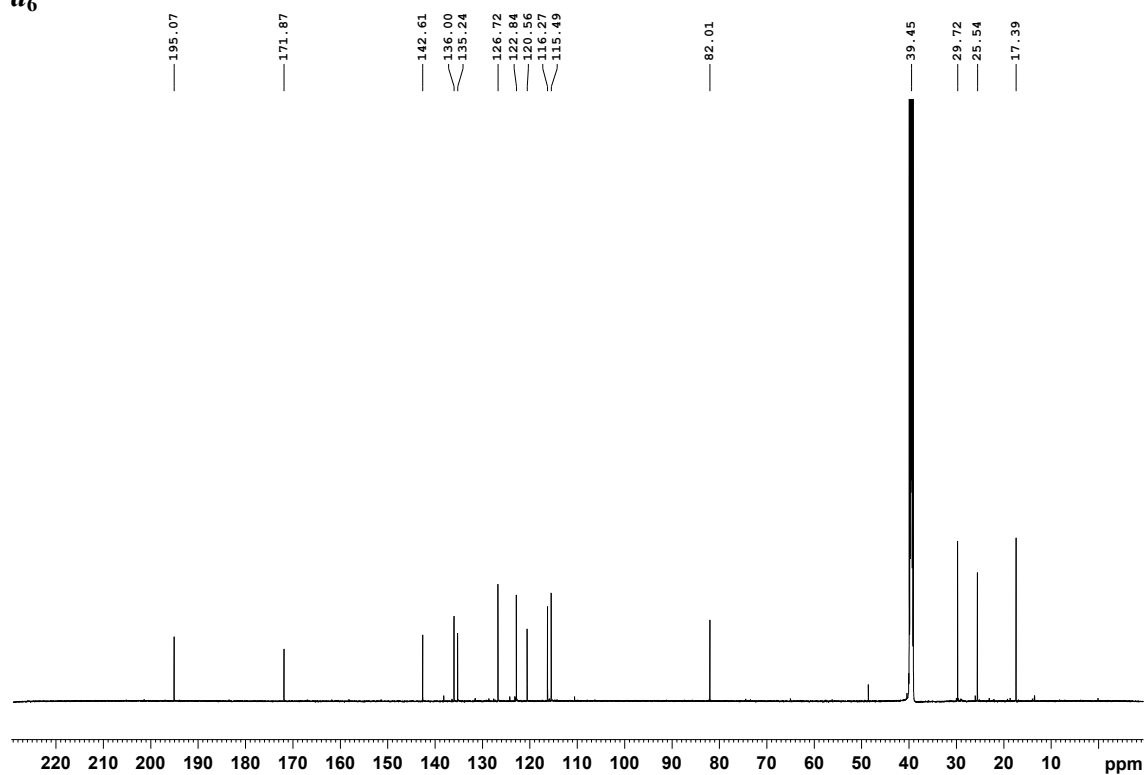

Figure S65. The HSQC spectrum of Clausenaside G (7) in DMSO-*d*<sub>6</sub>

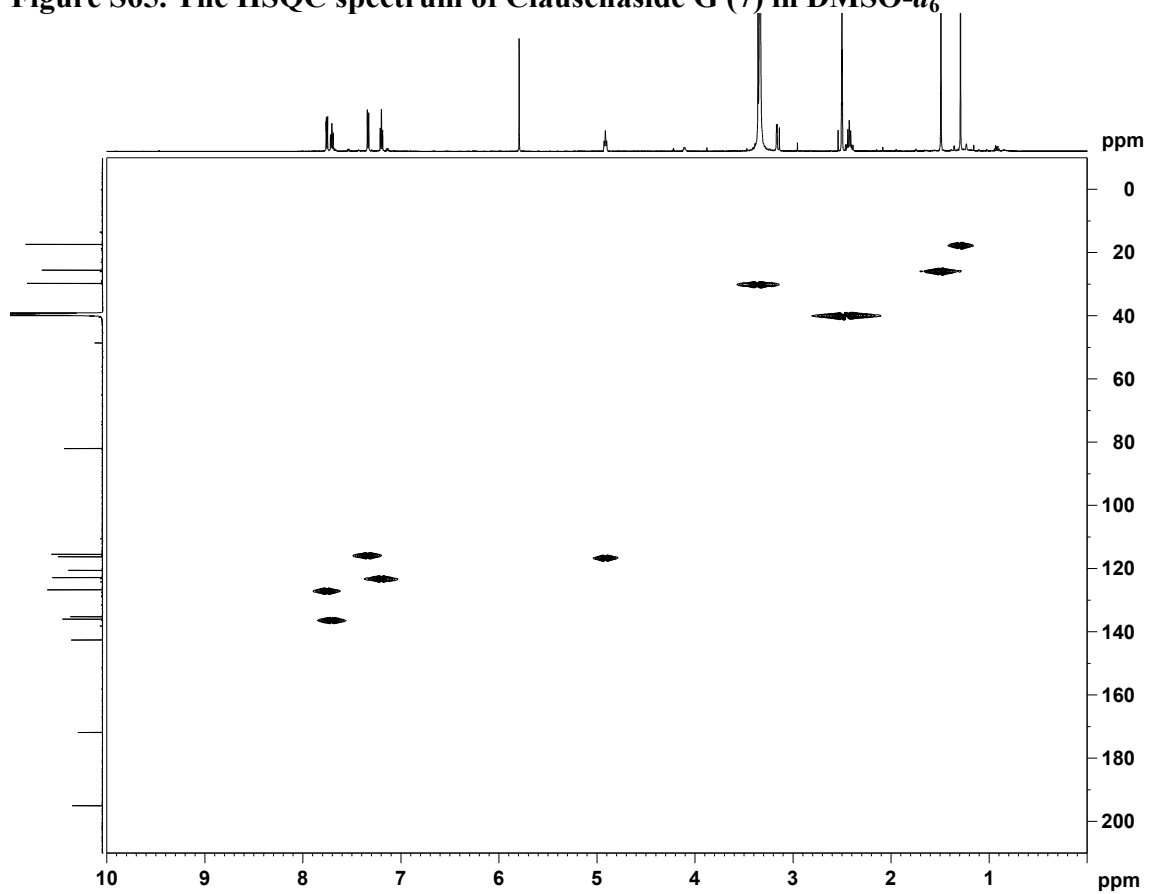

Figure S66. The HMBC spectrum of Clausenaside G (7) in DMSO-*d*<sub>6</sub>

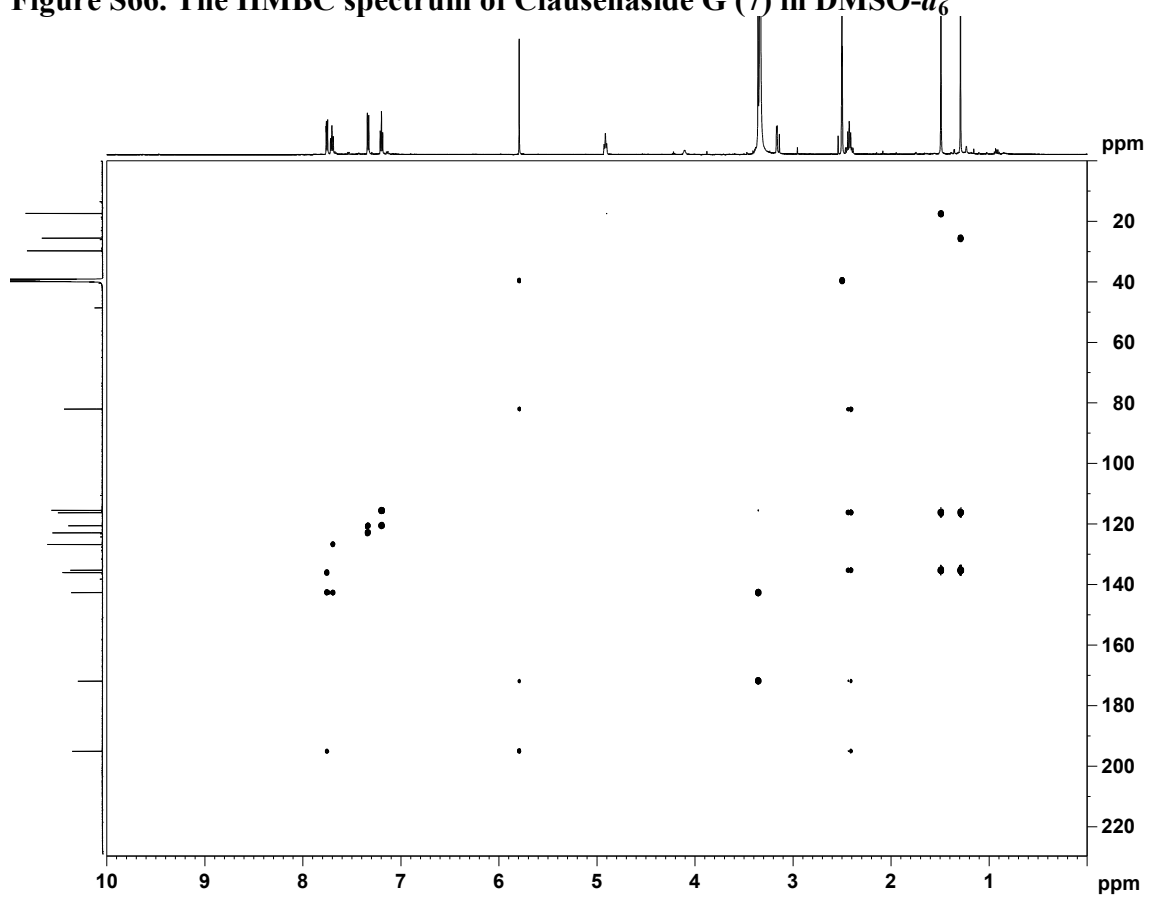

Figure S67. The  $^1\text{H}$ - $^1\text{H}$  COSY spectrum of Clausenaside G (7) in  $\text{DMSO-}d_6$

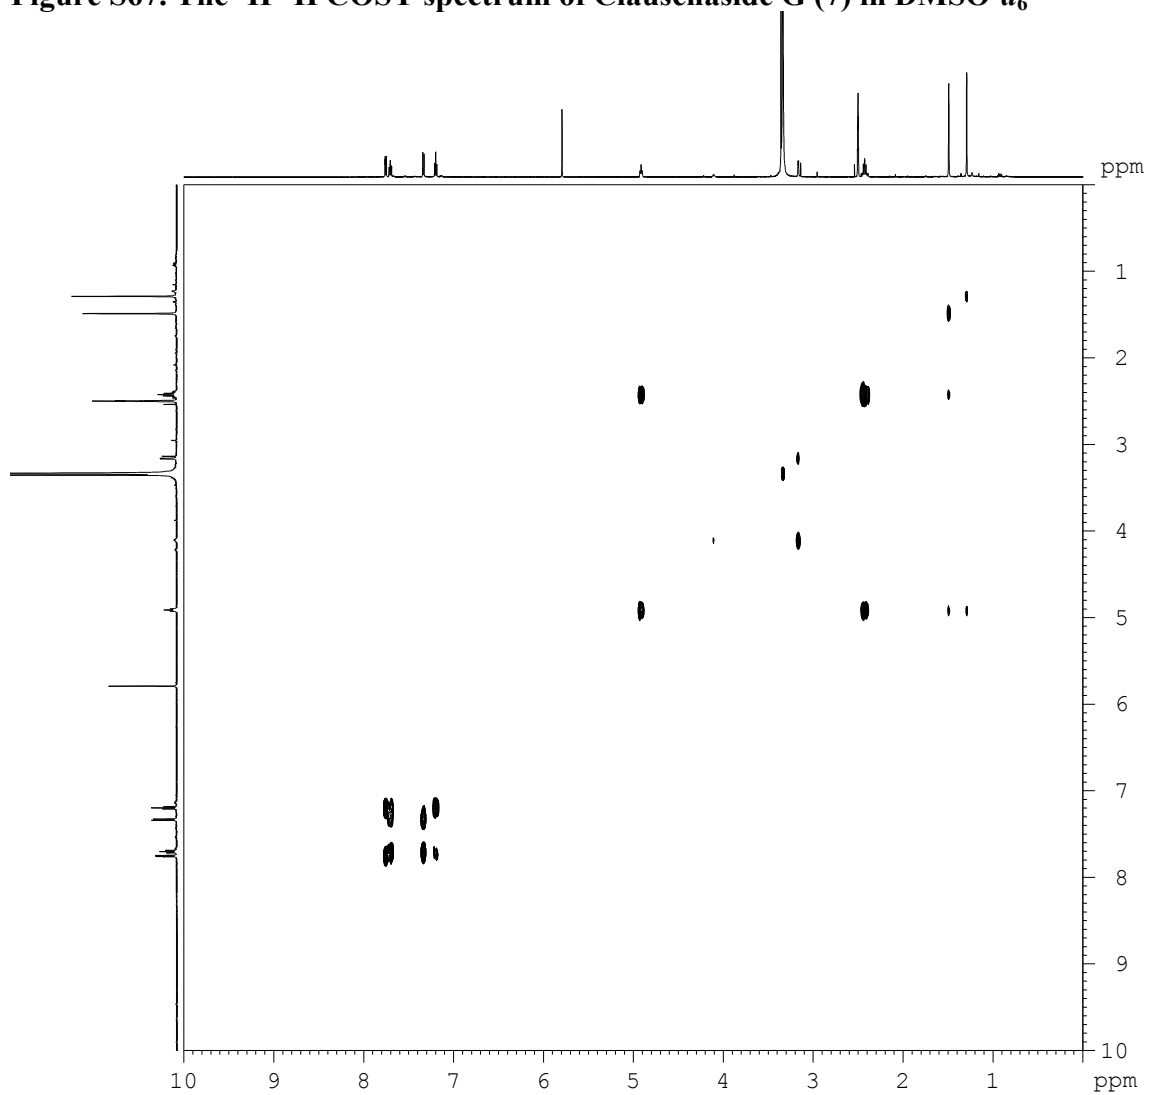

Figure S68. The IR spectrum of Clausenaside G (7)

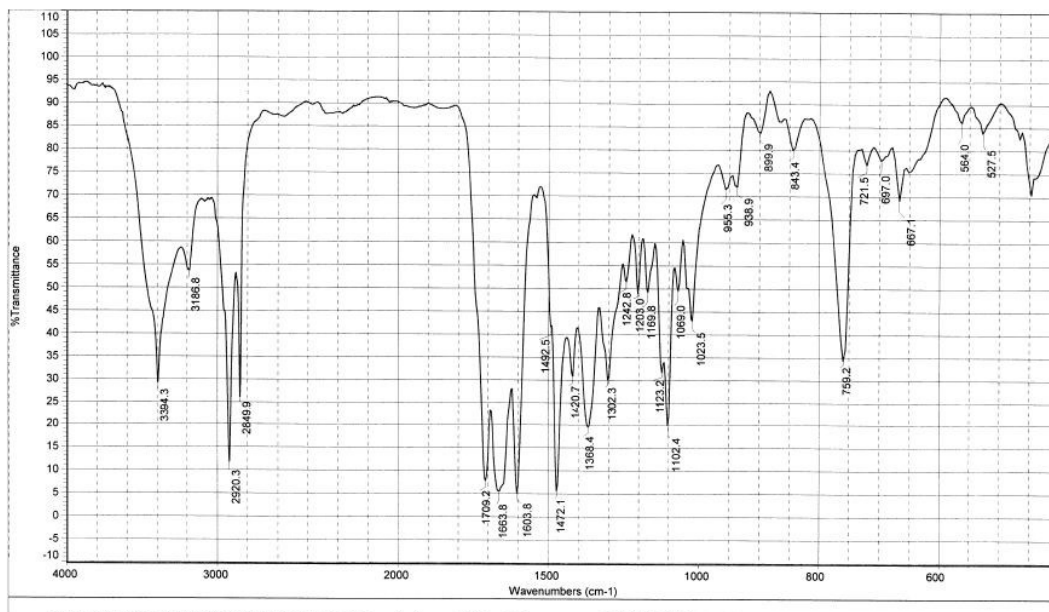

## Figure S69. The HRESIMS of Clausenaside G (7)

MS Formula Results: + Scan (6.414 min) Sub (2014110201.d)

| m/z                                 | Ion                                              | Formula                                             | Abundance |           |          |           |          |            |                |            |             |               |     |
|-------------------------------------|--------------------------------------------------|-----------------------------------------------------|-----------|-----------|----------|-----------|----------|------------|----------------|------------|-------------|---------------|-----|
| 282.1107                            | (M+Na) <sup>+</sup>                              | C <sub>15</sub> H <sub>17</sub> N Na O <sub>3</sub> | 361227.5  |           |          |           |          |            |                |            |             |               |     |
| Best                                | Formula (M)                                      | Ion Formula                                         | Score     | Cross Sco | Mass     | Calc Mass | Calc m/z | Diff (ppm) | Abs Diff (ppm) | Mass Match | Abund Match | Spacing Match | DBE |
| <input checked="" type="checkbox"/> | C <sub>15</sub> H <sub>17</sub> N O <sub>3</sub> | C <sub>15</sub> H <sub>17</sub> N Na O <sub>3</sub> | 98.24     |           | 259.1215 | 259.1208  | 282.1101 | -2.49      | 2.49           | 99.84      | 97.03       | 96.49         | 8   |



**Figure S70. Two conformations of Clausenaside G (7)**

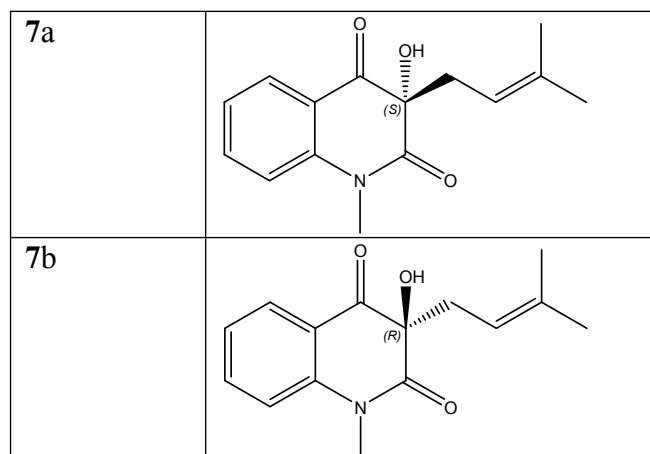

**Figure S71. Calculated ECD spectra of 3*S* (7a), Calculated ECD spectra of 3*R* (7b) and experimental ECD spectrum of Clausenaside G (7)**

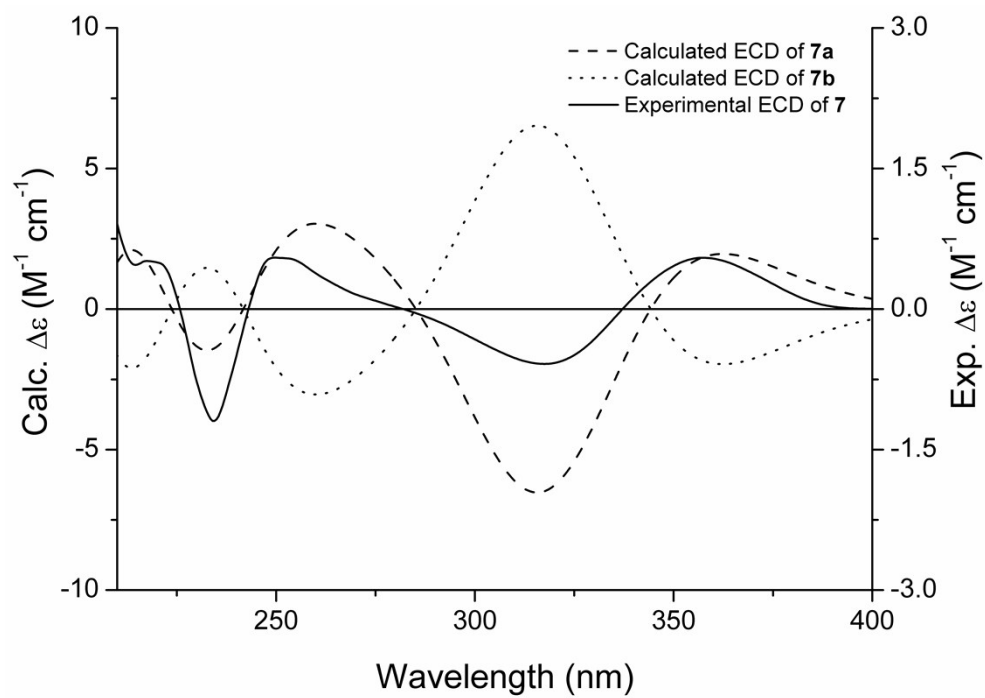

Figure S72. The  $^1\text{H}$  NMR (400 MHz) spectrum of Clausenaside H (8) in  $\text{DMSO-}d_6$

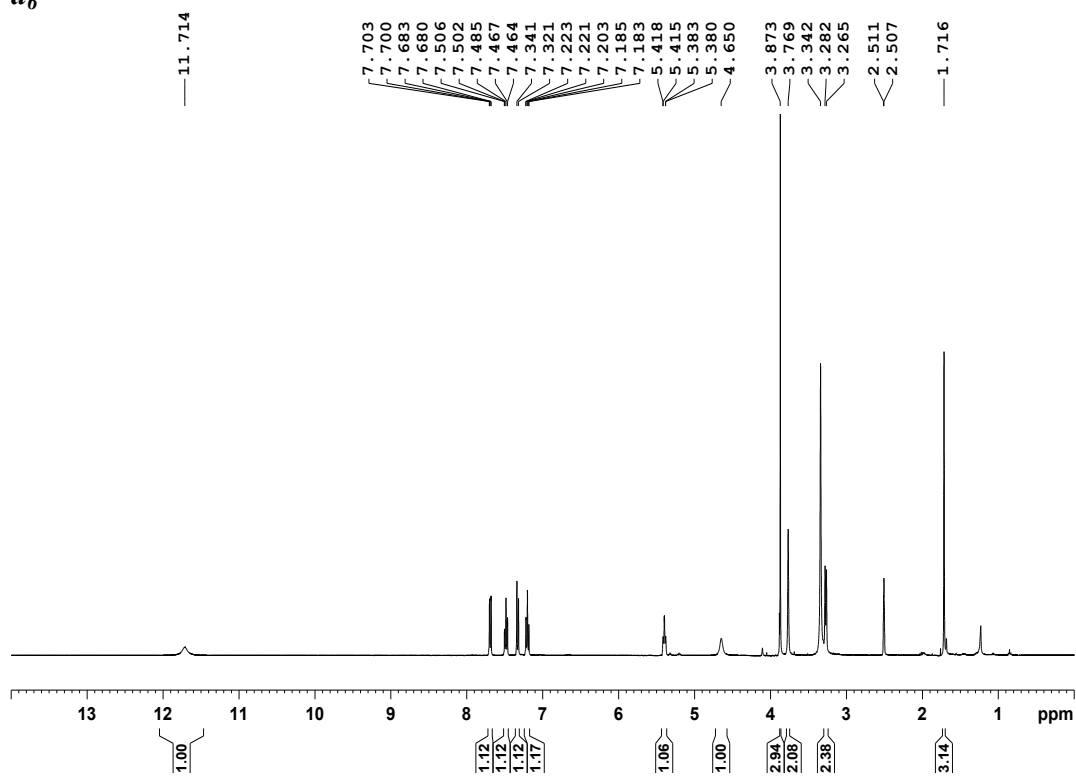

Figure S73. The  $^{13}\text{C}$  NMR (100 MHz) spectrum of Clausenaside H (8) in  $\text{DMSO-}d_6$

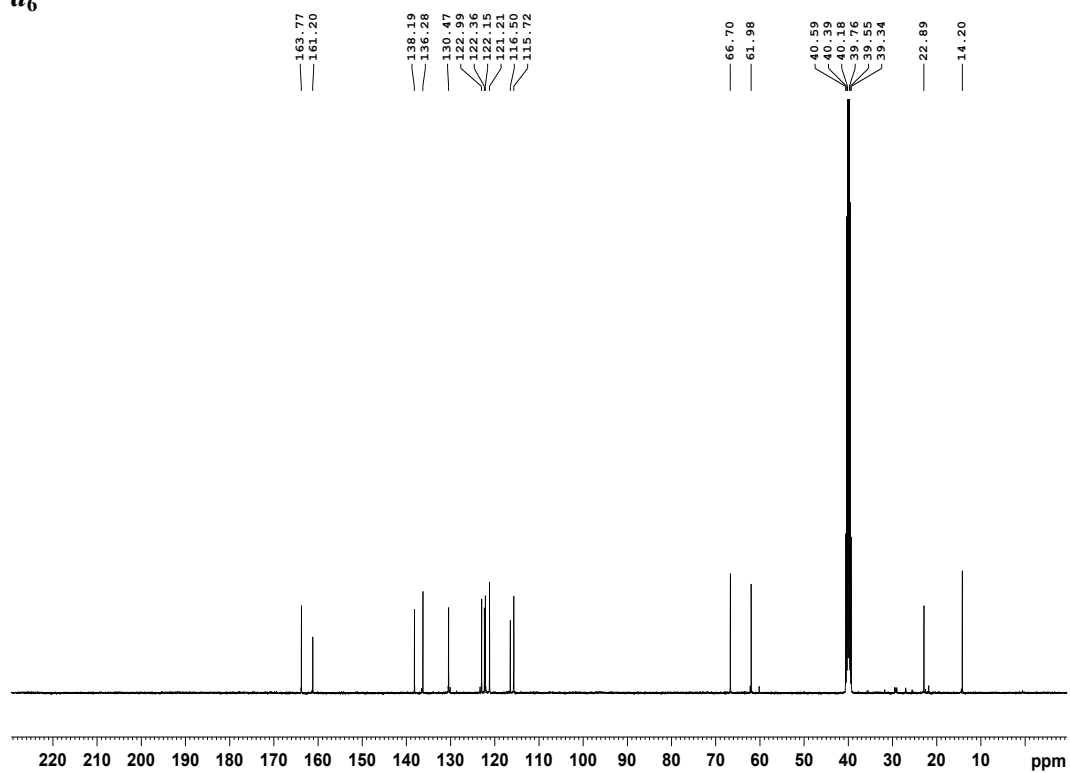

**Figure S74. The DEPT spectrum of Clausenaside H (8) in DMSO-*d*<sub>6</sub>**

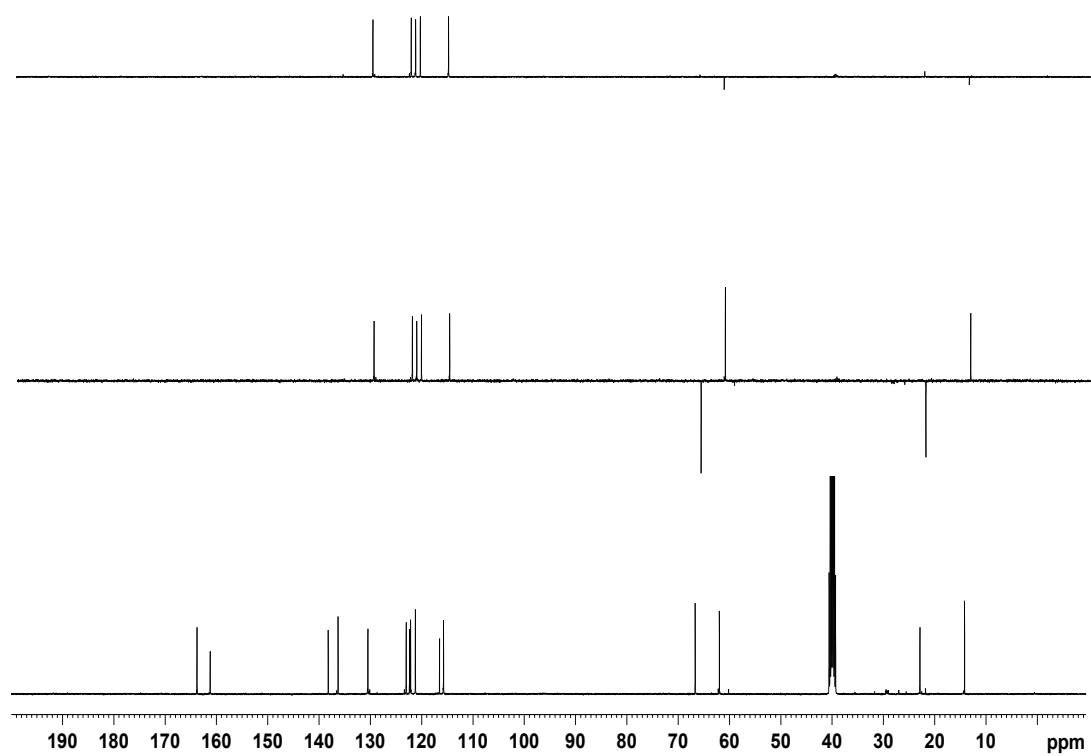

Figure S75. The HSQC spectrum of Clausenaside H (8) in DMSO-*d*<sub>6</sub>

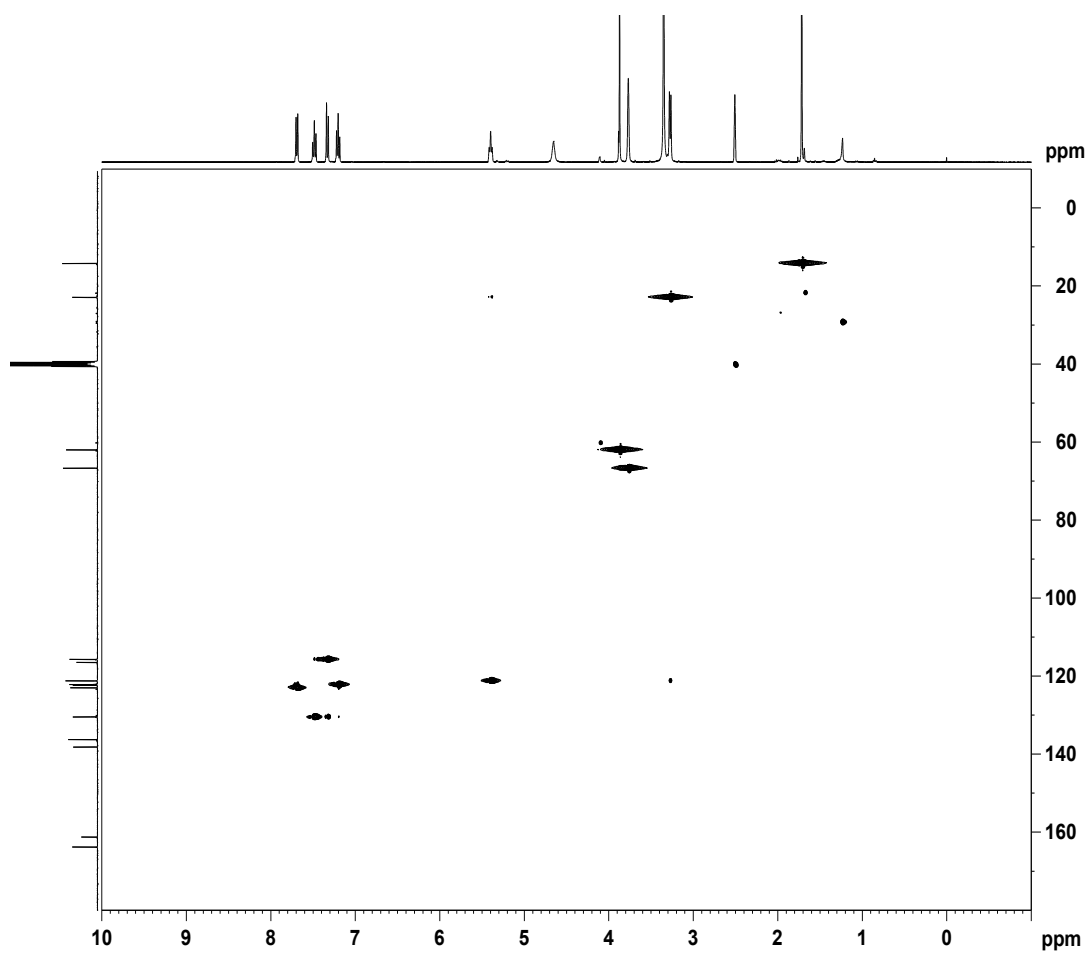

Figure S76. The HMBC spectrum of Clausenaside H (8) in DMSO-*d*<sub>6</sub>

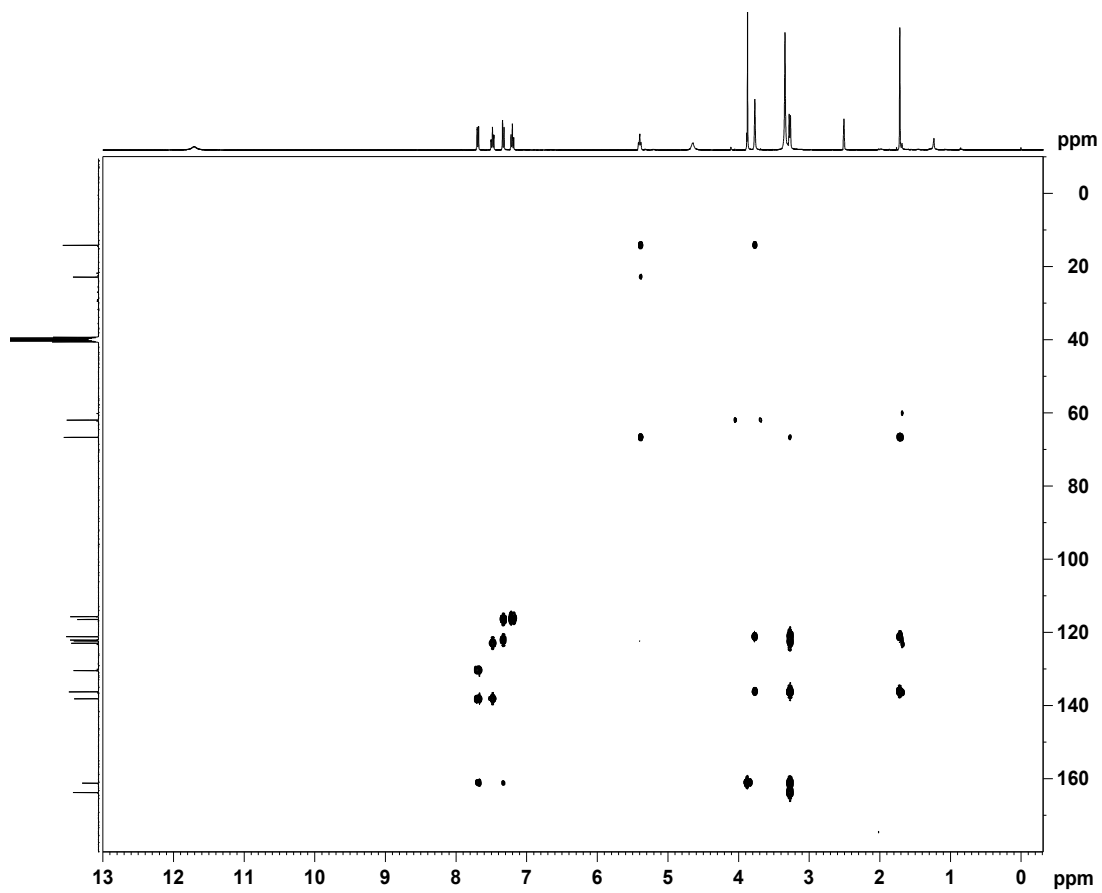

Figure S77. The  $^1\text{H}$ - $^1\text{H}$  COSY spectrum of Clausenaside H (8) in  $\text{DMSO-}d_6$

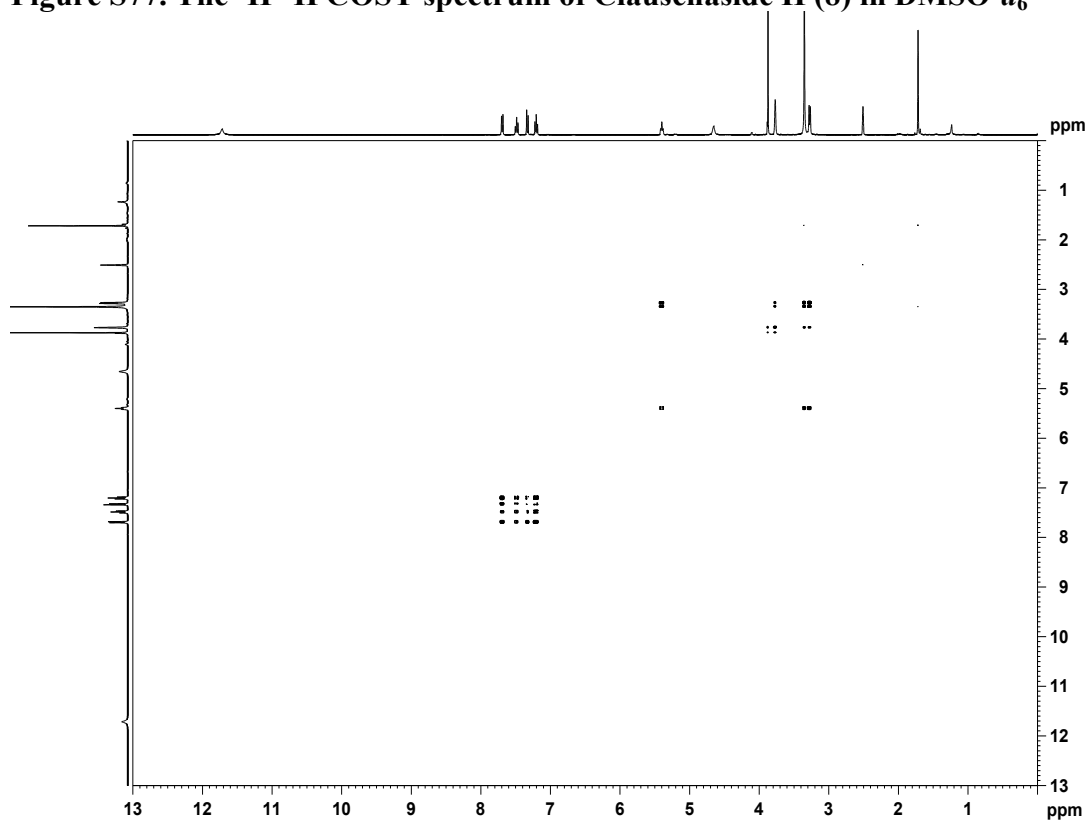



**Figure S78. The NOE difference spectrum of Clausenaside H (8) in DMSO- $d_6$**

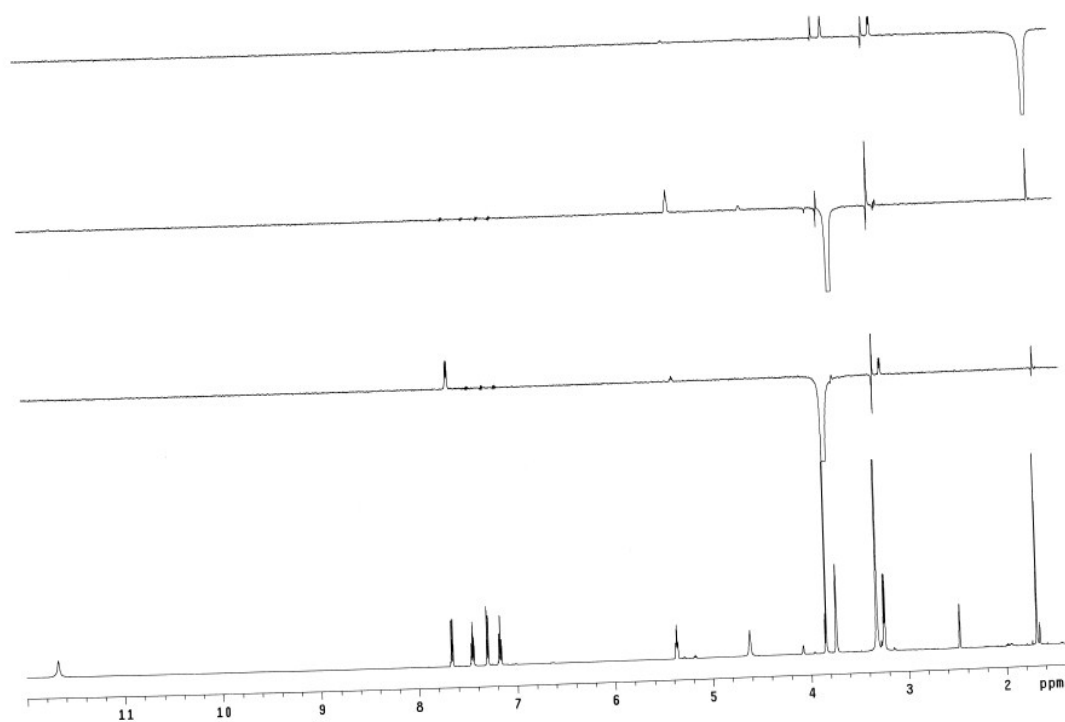

Figure S73. The IR spectrum of Clausenaside H (8)

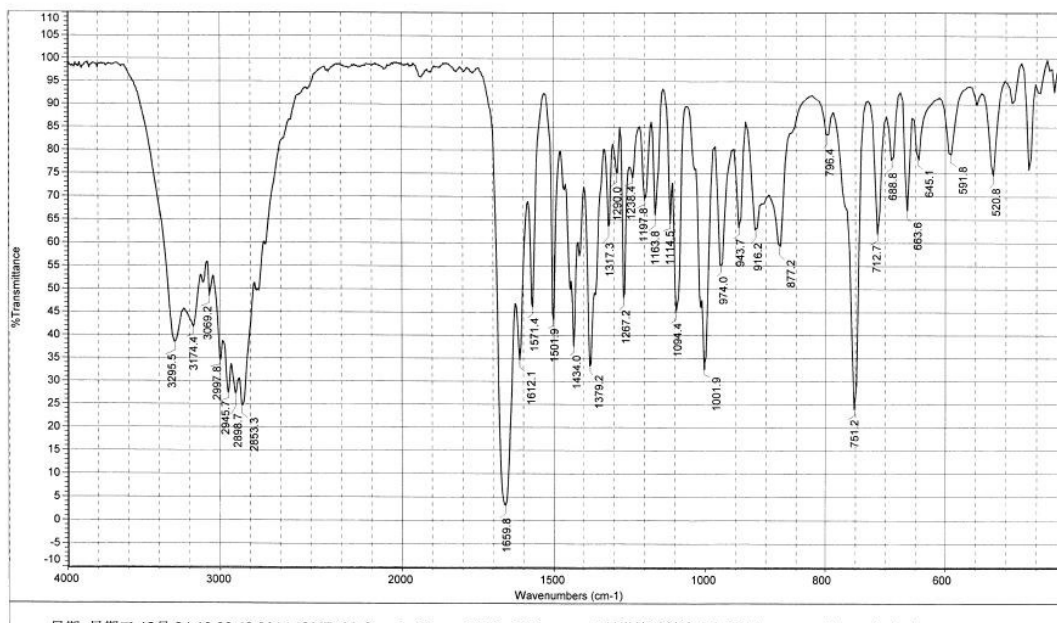

**Figure S74. The HRESIMS of Clausenaside H (8)**

MS Formula Results: + Scan (6.466 min) Sub (2014091103.d)

| m/z      | Ion                 | Formula         | Abundance |             |          |           |          |            |                |            |             |               |     |
|----------|---------------------|-----------------|-----------|-------------|----------|-----------|----------|------------|----------------|------------|-------------|---------------|-----|
| 260.128  | (M+H) <sup>+</sup>  | C15 H18 N O3    | 425025.8  |             |          |           |          |            |                |            |             |               |     |
| Best     | Formula (M)         | Ion Formula     | Score     | Cross Score | Mass     | Calc Mass | Calc m/z | Diff (ppm) | Abs Diff (ppm) | Mass Match | Abund Match | Spacing Match | DBE |
| ✓        | C15 H17 N O3        | C15 H18 N O3    | 99.97     |             | 259.1207 | 259.1208  | 260.1281 | 0.53       | 0.53           | 99.99      | 99.93       | 99.96         | 8   |
| m/z      | Ion                 | Formula         | Abundance |             |          |           |          |            |                |            |             |               |     |
| 282.1102 | (M+Na) <sup>+</sup> | C15 H17 N Na O3 | 642807.4  |             |          |           |          |            |                |            |             |               |     |
| Best     | Formula (M)         | Ion Formula     | Score     | Cross Score | Mass     | Calc Mass | Calc m/z | Diff (ppm) | Abs Diff (ppm) | Mass Match | Abund Match | Spacing Match | DBE |
| ✓        | C15 H17 N O3        | C15 H17 N Na O3 | 99.99     |             | 259.121  | 259.1208  | 282.1101 | -0.42      | 0.42           | 100        | 99.99       | 99.97         | 8   |
